# Supplementary material
Source: HighWire-hosted journal article supplement (https://erj.ersjournals.com/content/50/3/1602298)
Supplement: inline-supplementary-material-1 [file inline-supplementary-material-1.pdf]

## 1 Revised Online Supplement ERJ-02298-2016

2 Design and subjects

3 During the baseline visit data on demographics, medical history, physical examination and lung  
4 function were collected to assess inclusion criteria and severity of asthma. Subsequently,  
5 questionnaires were completed, atopy status was assessed and blood and sputum collected. Finally,  
6 nasal brushings and endobronchial biopsies were collected in a separate visit.

7 Severe asthma was defined according to the IMI consensus statement [E1], and thereby, patients  
8 were included who had a confirmed diagnosis of asthma that was uncontrolled despite high intensity  
9 asthma treatment ( $\geq 1000\mu\text{g}$  Fluticasone eq. plus a second controller) or could only be controlled  
10 with treatment by systemic oral corticosteroids (OCS) or omalizumab. Uncontrolled asthma was  
11 diagnosed if  $\geq 3$  of the following features were present: 1)  $>2$  weekly daytime symptoms, 2) any  
12 limitations of activities, 3)  $\geq 1$  weekly nocturnal symptoms 4)  $>2$  weekly need for reliever medication,  
13 5) pre bronchodilator FEV<sub>1</sub>  $< 80\%$  predicted or personal best, or if the patient encountered  $\geq 2$  yearly  
14 severe exacerbations. Current-smokers, ex-smokers and never-smokers were included.

15 PAL was diagnosed in patients with a post-bronchodilator FEV<sub>1</sub>/FVC  $<$  lower limit of normal (LLN).  
16 The LLN was calculated for each patient according to formulae stated by Quanjer *et al.* [E2] (for male  
17 subjects:  $-0.18 \times \text{AGE} + 75.41$ ; for female subjects:  $-0.19 \times \text{AGE} + 78.4$ ) consistent to LLN defined by  
18 Global Lung Function Initiative (GLI) [E3]. In order to examine consistency with other criteria for PAL  
19 we additionally performed an analysis based on PAL defined by post-bronchodilator FEV<sub>1</sub>  $<$  LLN. The  
20 U-BIOPRED study was registered at ClinicalTrials.gov identifier NCT01976767 and was approved by  
21 the Medical Ethics Boards of all participating centers. All patients provided written informed consent.

## 24 Measurements

### 25 *Clinical data*

26 Clinical data were collected according to predefined standard operating procedures (SOPs) and  
27 details on the methods of collection in U-BIOPRED have been published elsewhere [E4]. First, by  
28 history taking data on age, gender, body mass index (BMI), age of onset of asthma, medication and  
29 smoking history were assessed. Second, asthma symptoms were obtained by a questionnaire  
30 (ACQ)[E5]. Third, lung function was measured pre- and post-bronchodilator and according to  
31 standardized procedures [E6]. Fourth, eosinophil and neutrophil counts were assessed in blood and  
32 induced sputum samples.

### 33 *mRNA samples*

34 Gene expression was assessed on the total RNA in unselected samples of severe asthma patients in  
35 the following four different airway compartments: (1) nasal brushing (n=37), (2) induced sputum  
36 (n=79), (3) endobronchial brushings (n=62) and (4) endobronchial biopsies (n=50). There was no  
37 complete overlap between the samples, mainly because of limited sputum induction success rate  
38 (Fig. 1).

### 39 *Sputum induction*

40 Sputum samples, induced by inhalation of hypertonic saline, were processed with 0.1%DTT by using  
41 the selected sample technique, quality controlled according to ERS recommendations [E7]. Sputum  
42 was processed within 2 hours after collection and processed suspension was preserved in RNeasy®  
43 solution and then maintained at -80°C.

### 44 *Nasal brushing, endobronchial brushing and biopsy*

Nasal brushings were collected from one nostril (4mm plastic coated wire interdental brush (DENT.O.CARE Limited, 7 Cygnus Business Centre, Dalmeyer Road, London, UK)). Samples were embedded in phosphate buffer saline (PBS) directly after the procedure. Bronchoscopy procedures were based on U-BIOPRED SOPs and performed according to safety standards [E8]. Patients had refrained smoking  $\geq 6$  hours prior to the procedure, and subsequently received bronchodilator medication and local anesthesia. A flexible scope (type of scope depending on preferences of physician and clinical center) was introduced and, first, four endobronchial brushings were performed in a large airway (bronchus intermedius) contacting the wall at least 4 times (with e.g. Olympus REF: BC-202D-2010 (2mm brush size) or BC-202D-3010 (3mm brush size), KeyMed (Medical & Industrial Equipment, Ltd OLYMPUS Group Company)). Subsequently, up to 8 endobronchial biopsies were taken from the 2<sup>nd</sup> and 4<sup>th</sup> airway carinae of the right or left lower and middle lobes, working upwards (with a disposable 1.8 mm cupped biopsy forceps). Nasal brushings and endobronchial biopsies and brushings were immediately preserved in RNeasy Lysis solution and then maintained at -80°C. RNA was extracted using Qiagen miRNeasy kit (Qiagen; Germantown, MD) and amplified with NuGen ovation pico WTA kit (NuGen Technologies; San Carlos, CA).

#### *mRNA microarray analysis*

Microarray analysis was performed with the Affymetrix HT HG-U133+ PM microarray platform (Affymetrix, Santa Clara, Ca). Pre-processing and quality control were performed with multi-array average normalization (Almac, Craiganvond, UK) and the obtained CEL files were normalized. Technical outliers were excluded (chip image analysis, Affymetrix GeneChip QC, RNA degradation analysis, distribution analysis, principal components analysis, and correlation analysis) and CEL files re-normalized using the robust multi-array (RMA) method. Technical batch effects (e.g., from microarray hybridization date/lot, RNA processing batch) were adjusted in the data matrices using linear modeling of batch (as random factor).

## 69 **Statistical analysis**

70 Clinical variables were summarized as mean±standard deviation when normally distributed, as  
 71 median (interquartile range) when skewed and as their frequencies (proportion) when categorical.  
 72 Between group comparison was performed with independent t-tests, Mann-Whitney U test or chi-  
 73 square tests, as appropriate. Clinical variables with a  $p < 0.05$  were considered significantly different.

## 74 *GSVA*

75 Gene set variation analysis (GSVA) is a statistical technique that allows sensitive identification of  
 76 differences in expression of sets of genes between heterogeneous groups and can be used to explore  
 77 for underlying pathways [E9]. Sets of genes were predefined, and were based on the available gene  
 78 expression publications and data on airways disease, including human and murine models, both *in*  
 79 *vivo* and *in vitro* studies, to assure sensitive pathway detection. These included studies on the gene  
 80 expression associated with (1) airway disease treatment, (2) immunologic pathways and (3) induced  
 81 lung injury or inflammation. The latter included gene signatures that were identified at several time  
 82 points after the admission of either Poly(I:C) as a model for exacerbations [E10], or bleomycin, which  
 83 is used as a model for mimicking the course of fibrotic processes in the lung [E11]. For this discovery  
 84 study 105 predefined gene sets were entered into the statistical models (Table E7).

## 85 *Enrichment scores and false discovery*

86 Enrichment scores (ES) were calculated for each patient and for each of the gene signatures and  
 87 were based on the gene expression of genes in the sets. ES could range from a value of -1 to 1 [E9].  
 88 Subsequently, mean ES were calculated for patients with PAL and patients without PAL and  
 89 Generalized Linear Models, including correction for smoking status, corticosteroid usage and  
 90 duration of asthma, were applied to statistically compare ES between the groups. In order to  
 91 minimize false discovery, only gene signatures that had  $p < 0.05$  and a difference of ES (dES) between

of the groups of  $\geq 0.2$  were considered significantly different, following the Microarray Consortium for Quality Control (MACQC) recommendations regarding the need for applying group-difference thresholds in order to stringently limit false discovery [E12].

*Consistency when using different definition of PAL*

211 out of 421 patients (50.1%) were having PAL defined as  $FEV_1 < LLN$ . Patient characteristics were similar in both analyses, however patients with PAL defined as  $FEV_1 < LLN$  were also more frequent female and had a higher ACQ score (Table E5).

GSVA analysis showed that identified signatures between  $FEV_1/FVC < LLN$  and  $FEV_1 < LLN$  were also similar, including those associated with treatment with fluticasone, eosinophilic inflammation and involvement of  $T_H2$  helper cells and IFN- $\alpha$ . In addition, induced lung injury and inflammation gene signatures were identified in both analyses as well (Table E6). However, involvement of CD4 T-cells of rheumatoid arthritis was not consistent, and no significant gene signatures were identified in the biopsies applying  $FEV_1 < LLN$ .

107

**Table E1: Patient Characteristics of Nasal Brushings sample**

|                                               | <b>No PAL</b>          | <b>PAL</b>             | <b>P-Value</b>   |
|-----------------------------------------------|------------------------|------------------------|------------------|
| <b>n</b>                                      | 15                     | 22                     |                  |
| <b>Gender = Female (%)</b>                    | <b>11 (73.3%)</b>      | <b>8 (36.4%)</b>       | <b>0.045</b>     |
| <b>Age (yrs)*</b>                             | 47.5 ± 16.2            | 53.2 ± 12.1            | 0.229            |
| <b>BMI (Kg/m<sup>2</sup>)*</b>                | 34.1 ± 6.6             | 29.4 ± 5.7             | 0.027            |
| <b>Asthma Duration (yrs)*</b>                 | 25.0 [14.0 - 38.0]     | 21.5 [17.0 - 40.5]     | 0.914            |
| <b>Smoking Status (%)</b>                     |                        |                        | 0.188            |
| <i><b>Never Smokers</b></i>                   | 12 (80.0)              | 11 (50.0)              |                  |
| <i><b>Ex-smokers</b></i>                      | 3 (20.0)               | 8 (36.4)               |                  |
| <i><b>Current-smokers</b></i>                 | 0 (0.0)                | 3 (13.6)               |                  |
| <b>Packyears†</b>                             | 5.0 [3.3 - 5.1]        | 20.0 [11.5 - 38.5]     | 0.052            |
| <b>OCS dose (mg)†</b>                         | 10.0 [8.0 - 25.0]      | 10.00 [8.12, 13.75]    | 0.616            |
| <b>ACQ*</b>                                   | 1.9 ± 1.0              | 2.2 ± 1.2              | 0.414            |
| <b>Exacerbations per year†</b>                | 2.0 [1.0 - 4.0]        | 3.0 [1.0 - 4.0]        | 0.982            |
| <b>pbFEV<sub>1</sub> (% predicted)*</b>       | <b>99.4 ± 17.6</b>     | <b>71.5 ± 14.9</b>     | <b>&lt;0.001</b> |
| <b>Blood Eosinophils (x10<sup>3</sup>/L)†</b> | 0.2 [0.1 - 0.4]        | 0.2 [0.1 - 0.3]        | 0.817            |
| <b>Blood Neutrophils (x10<sup>3</sup>/L)†</b> | <b>3.8 [3.6 - 5.1]</b> | <b>5.0 [4.2 - 7.8]</b> | <b>0.033</b>     |
| <b>Sputum Eosinophils (%)†</b>                | 1.4 [0.4 - 4.6]        | 2.6 [0.2 - 13.8]       | 0.614            |
| <b>Sputum Neutrophils (%)*</b>                | 46.6 ± 18.4            | 63.2 ± 18.8            | 0.053            |

\* mean ± SD; † median [Interquartile Range]; PAL: persistent airflow limitation;  
 OCS: Oral corticosteroids; ACQ: Asthma Control Questionnaire FEV<sub>1</sub>: Forced  
 Expiratory Volume in the first second

108

109

110

**Table E2: Patient Characteristics of sputum sample**

|                                               | <b>No PAL</b>          | <b>PAL</b>              | <b>P-Value</b>   |
|-----------------------------------------------|------------------------|-------------------------|------------------|
| <b>n</b>                                      | 21                     | 58                      |                  |
| <b>Gender = Female (%)</b>                    | 13 (61.9%)             | 35 (60.3%)              | 1.000            |
| <b>Age (yrs)*</b>                             | 52.5 ± 13.9            | 54.2 ± 11.4             | 0.580            |
| <b>BMI (Kg/m<sup>2</sup>)*</b>                | 28.2 ± 5.0             | 28.1 ± 5.3              | 0.928            |
| <b>Asthma Duration (yrs)*</b>                 | 23.1 ± 14.5            | 26.8 ± 17.2             | 0.374            |
| <b>Smoking Status (%)</b>                     |                        |                         | 0.799            |
| <i><b>Never Smokers</b></i>                   | 11 (52.4%)             | 35 (60.3%)              |                  |
| <i><b>Ex-smokers</b></i>                      | 8 (38.1%)              | 18 (31.0%)              |                  |
| <i><b>Current-smokers</b></i>                 | 2 (9.5%)               | 5 (8.6%)                |                  |
| <b>Packyears†</b>                             | 13.8 [2.9 - 19.7]      | 10.0 [2.8 - 18.8]       | 0.922            |
| <b>OCS dose (mg)†</b>                         | 10.0 [8.8 - 12.5]      | 10.0 [6.9 - 13.1]       | 0.691            |
| <b>ACQ*</b>                                   | 2.6 ± 1.4              | 2.6 ± 1.3               | 0.914            |
| <b>Exacerbations per year†</b>                | 2.0 [2.0 – 3.5]        | 2.0 [1.5 – 4.0]         | 0.833            |
| <b>pbFEV<sub>1</sub> (% predicted)*</b>       | <b>90.2 ± 14.0</b>     | <b>63.5 ± 19.9</b>      | <b>&lt;0.001</b> |
| <b>Blood Eosinophils (x10<sup>3</sup>/L)†</b> | 0.2 [0.2 - 0.3]        | 0.4 [0.2 - 0.5]         | 0.203            |
| <b>Blood Neutrophils (x10<sup>3</sup>/L)†</b> | 4.3 [3.3 - 6.3]        | 5.0 [3.9 - 7.5]         | 0.051            |
| <b>Sputum Eosinophils (%)†</b>                | <b>1.3 [0.2 - 3.8]</b> | <b>6.2 [1.3 - 28.5]</b> | <b>&lt;0.001</b> |
| <b>Sputum Neutrophils (%)*</b>                | 61.5 ± 23.6            | 58.5 ± 27.1             | 0.663            |

\* mean ± SD; † median [Interquartile Range]; PAL: persistent airflow limitation;  
 OCS: Oral corticosteroids; ACQ: Asthma Control Questionnaire FEV<sub>1</sub>: Forced  
 Expiratory Volume in the first second

111

112

113

**Table E3: Patient Characteristics of endobronchial brushings sample**

|                                               | No PAL                 | PAL                      | P-Value          |
|-----------------------------------------------|------------------------|--------------------------|------------------|
| <b>n</b>                                      | 30                     | 32                       |                  |
| <b>Gender = Female (%)</b>                    | <b>19 (63.3)</b>       | <b>10 (31.2)</b>         | <b>0.021</b>     |
| <b>Age (yrs)*</b>                             | 46.7 ± 14.0            | 53.0 ± 11.1              | 0.052            |
| <b>BMI (Kg/m<sup>2</sup>)*</b>                | 31.3 ± 6.3             | 28.5 ± 6.1               | 0.081            |
| <b>Asthma Duration (yrs)*</b>                 | 26.4 ± 16.8            | 26.7 ± 17.9              | 0.940            |
| <b>Smoking Status (%)</b>                     |                        |                          | 0.077            |
| <i>Never Smokers</i>                          | 22 (73.3)              | 15 (46.9)                |                  |
| <i>Ex-smokers</i>                             | 7 (23.3)               | 12 (37.5)                |                  |
| <i>Current-smokers</i>                        | 1 (3.3)                | 5 (15.6)                 |                  |
| <b>Packyears†</b>                             | <b>5.1 [1.4 - 8.1]</b> | <b>18.8 [7.0 - 24.0]</b> | <b>0.031</b>     |
| <b>OCS dose (mg)†</b>                         | 10.0 [10.0 - 21.3]     | 10.0 [6.5 - 16.3]        | 0.246            |
| <b>ACQ*</b>                                   | 2.1 ± 1.2              | 2.4 ± 1.0                | 0.314            |
| <b>Exacerbations per year†</b>                | 2.0 [2.0 – 4.0]        | 3.0 [2.0 – 4.0]          | 0.768            |
| <b>pbFEV<sub>1</sub> (% predicted)*</b>       | <b>91.9 ± 14.3</b>     | <b>66.7 ± 15.5</b>       | <b>&lt;0.001</b> |
| <b>Blood Eosinophils (x10<sup>3</sup>/L)†</b> | 0.2 [0.1 - 0.4]        | 0.2 [0.1 - 0.3]          | 0.319            |
| <b>Blood Neutrophils (x10<sup>3</sup>/L)†</b> | <b>4.0 [3.2 - 5.4]</b> | <b>5.8 [4.1 - 7.7]</b>   | <b>0.005</b>     |
| <b>Sputum Eosinophils (%)†</b>                | 1.4 [0.6 - 4.6]        | 4.5 [0.2 - 24.9]         | 0.520            |
| <b>Sputum Neutrophils (%)*</b>                | 48.5 ± 20.7            | 61.6 ± 23.3              | 0.143            |

\* mean ± SD; † median [Interquartile Range]; PAL: persistent airflow limitation;  
 OCS: Oral corticosteroids; ACQ: Asthma Control Questionnaire FEV<sub>1</sub>: Forced  
 Expiratory Volume in the first second

114

115

116



117

**Table E4: Patient Characteristics of endobronchial biopsies sample**

|                                               | <b>No PAL</b>           | <b>PAL</b>                | <b>P-Value</b>   |
|-----------------------------------------------|-------------------------|---------------------------|------------------|
| <b>n</b>                                      | 22                      | 28                        |                  |
| <b>Gender = Female (%)</b>                    | 14 (63.6%)              | 12 (42.9%)                | 0.166            |
| <b>Age (yrs)*</b>                             | 48.4 ± 12.6             | 52.7 ± 11.2               | 0.212            |
| <b>BMI (Kg/m<sup>2</sup>)*</b>                | 30.2 ± 5.4              | 28.6 ± 6.4                | 0.344            |
| <b>Asthma Duration (yrs)*</b>                 | 25.8 ± 15.5             | 30.5 ± 18.7               | 0.353            |
| <b>Smoking Status (%)</b>                     |                         |                           | 0.245            |
| <i>Never Smokers</i>                          | 16 (72.7%)              | 16 (57.1%)                |                  |
| <i>Ex-smokers</i>                             | 5 (22.7%)               | 6 (21.4%)                 |                  |
| <i>Current-smokers</i>                        | 1 (4.5%)                | 6 (21.4%)                 |                  |
| <b>Packyears†</b>                             | <b>5.3 [2.0 - 13.4]</b> | <b>21.5 [18.0 - 27.5]</b> | <b>0.049</b>     |
| <b>OCS dose (mg)†</b>                         | 10.0 [7.9 - 10.0]       | 10.0 [6.0 - 15.0]         | 0.966            |
| <b>ACQ*</b>                                   | 2.3 (1.3)               | 2.4 (1.1)                 | 0.721            |
| <b>Exacerbations per year†</b>                | 2.0 [2.0 – 3.3]         | 3.0 [2.0 – 4.0]           | 0.249            |
| <b>pbFEV<sub>1</sub> (% predicted)*</b>       | <b>89.6 ± 13.6</b>      | <b>68.3 ± 15.2</b>        | <b>&lt;0.001</b> |
| <b>Blood Eosinophils (x10<sup>3</sup>/L)†</b> | 0.2 [0.1 - 0.3]         | 0.2 [0.1 - 0.3]           | 0.683            |
| <b>Blood Neutrophils (x10<sup>3</sup>/L)†</b> | 4.0 [3.5 - 5.3]         | 5.0 [4.3 - 7.3]           | 0.050            |
| <b>Sputum Eosinophils (%)†</b>                | 2.0 [0.7 - 8.0]         | 2.6 [0.2 - 6.1]           | 0.938            |
| <b>Sputum Neutrophils (%)*</b>                | 50.4 ± 19.5             | 56.5 ± 27.0               | 0.518            |

\* mean ± SD; † median [Interquartile Range]; PAL: persistent airflow limitation;  
OCS: Oral corticosteroids; ACQ: Asthma Control Questionnaire FEV<sub>1</sub>: Forced  
Expiratory Volume in the first second

118

119

**Table E5: Patient characteristics of patients with persistent airflow limitation (PAL) defined as post-bronchodilator FEV<sub>1</sub> < LLN**

|                                               | <b>no PAL</b>             | <b>PAL</b>                | <b>P-value</b>   |
|-----------------------------------------------|---------------------------|---------------------------|------------------|
| <b>n</b>                                      | <b>210</b>                | <b>211</b>                |                  |
| <b>Female (%)</b>                             | <b>118 (56.2)</b>         | <b>143 (67.8)</b>         | <b>0.016</b>     |
| <b>Age (yrs)*</b>                             | <b>49.7 ± 14.8</b>        | <b>54.1 ± 11.6</b>        | <b>0.001</b>     |
| <b>BMI (Kg/m<sup>2</sup>)*</b>                | 29.3 ± 6.3                | 29.2 ± 6.3                | 0.825            |
| <b>Asthma Duration (yrs)†</b>                 | <b>20.0 [11.0 - 30.0]</b> | <b>26.0 [13.3 - 41.8]</b> | <b>&lt;0.001</b> |
| <b>Smoking history (%)</b>                    |                           |                           | 0.832            |
| <b>Never</b>                                  | 133 (63.3)                | 131 (62.1)                |                  |
| <b>Ex-smoker</b>                              | 58 (27.6)                 | 57 (27.0)                 |                  |
| <b>Current smoker</b>                         | 19 (9.0)                  | 23 (10.9)                 |                  |
| <b>Packyears†</b>                             | 12.5 [4.5 - 20.0]         | 12.7 [3.8 - 21.4]         | 0.975            |
| <b>OCS dose†</b>                              | 12.8 ± 8.6                | 14.3 ± 10.6               | 0.345            |
| <b>ACQ*</b>                                   | <b>2.3 ± 1.3</b>          | <b>3.0 ± 1.2</b>          | <b>&lt;0.001</b> |
| <b>Exacerbations per year †</b>               | 2.0 [1.0 - 4.0]           | 2.0 [2.0 - 3.0]           | 0.568            |
| <b>pbFEV<sub>1</sub> (% pred)*</b>            | <b>91.5 ± 13.6</b>        | <b>60.2 ± 15.1</b>        | <b>&lt;0.001</b> |
| <b>Blood Eosinophils (x10<sup>9</sup>/L)†</b> | 0.2 [0.1 - 0.4]           | 0.2 [0.1 - 0.4]           | 0.950            |
| <b>Blood Neutrophils (x10<sup>9</sup>/L)†</b> | 4.9 [3.8 - 6.4]           | 4.8 [3.6 - 7.3]           | 0.969            |
| <b>Sputum Eosinophils (%)†</b>                | 2.0 [0.4 - 9.6]           | 3.8 [1.0 - 20.7]          | 0.099            |
| <b>Sputum Neutrophils (%)*</b>                | 51.7 [31.5 - 72.8]        | 56.5 [37.4 - 74.4]        | 0.298            |

\* mean ± SD; † median [Interquartile Range]; PAL: persistent airflow limitation; OCS: Oral corticosteroids; ACQ: Asthma Control Questionnaire; FEV<sub>1</sub>: Forced Expiratory Volume in the first second

**Table E6: Differentially enriched gene signatures in severe asthma patients with FEV1 post-bronchodilator < LLN as compared to severe asthma patients without FEV1 post-bronchodilator < LLN**

|                                            | Gene signatures associated with                          | Nasal brush |         | Sputum |         | Endobr. Brush |         | Endobr. Biopsy |         |
|--------------------------------------------|----------------------------------------------------------|-------------|---------|--------|---------|---------------|---------|----------------|---------|
|                                            |                                                          | dES         | p-value | dES    | p-value | dES           | p-value | dES            | p-value |
| <b>Treatment gene signatures</b>           | Fluticasone treatment in asthma - DOWN <sup>1*</sup>     |             |         |        |         | 0.23          | 0.007   |                |         |
|                                            | Fluticasone treatment in asthma - UP <sup>1*</sup>       |             |         |        |         | 0.23          | 0.009   |                |         |
|                                            | Asthma (HDM induced model) - UP <sup>3</sup>             |             |         |        |         | 0.21          | 0.009   |                |         |
| <b>Immunologic gene signatures</b>         | Eosinophils - UP <sup>1*</sup>                           |             |         | 0.37   | 0.001   | 0.21          | 0.039   |                |         |
|                                            | TH2 activated - DOWN <sup>2*</sup>                       | -0.21       | 0.033   |        |         |               |         |                |         |
|                                            | IFN-alpha - UP <sup>1*</sup>                             |             |         | -0.19  | 0.011   |               |         |                |         |
| <b>Induced lung injury gene signatures</b> | Induced inflammation (Poly I:C - 72h) - UP <sup>3*</sup> |             |         | -0.21  | 0.002   |               |         |                |         |
|                                            | Induced injury (Bleomycin - Day 2) - UP <sup>3*</sup>    |             |         | -0.19  | 0.003   |               |         |                |         |

Differences in mean gene signature enrichment scores between severe asthma patients with FEV1 post-bronchodilator < LLN as compared to severe asthma patients without FEV1 post-bronchodilator < LLN (in RED are higher and in BLUE are lower). \* Comparable results as found in PAL defined as Fev1/FVC < LLN; <sup>1</sup>In vitro model in human sample; <sup>2</sup>In vivo model in human sample; <sup>3</sup>In vivo model in murine model

## References

- E1. Bel EH, Sousa A, Fleming L, Bush A, Chung KF, Versnel J, Wagener AH, Wagers SS, Sterk PJ, Compton CH. Diagnosis and definition of severe refractory asthma: an international consensus statement from the Innovative Medicine Initiative (IMI). *Thorax* 2011; 66(10): 910-917.
- E2. Quanjer PH, Tammeling GJ, Cotes JE, Pedersen OF, Peslin R, Yernault JC. Lung volumes and forced ventilatory flows. *The European respiratory journal* 1993; 6 Suppl 16: 5-40.
- E3. Quanjer PH, Stanojevic S, Cole TJ, Baur X, Hall GL, Culver BH, Enright PL, Hankinson JL, Ip MS, Zheng J, Stocks J. Multi-ethnic reference values for spirometry for the 3-95-yr age range: the global lung function 2012 equations. *The European respiratory journal* 2012; 40(6): 1324-1343.
- E4. Shaw DE, Sousa AR, Fowler SJ, Fleming LJ, Roberts G, Corfield J, Pandis I, Bansal AT, Bel EH, Auffray C, Compton CH, Bisgaard H, Bucchioni E, Caruso M, Chanez P, Dahlen B, Dahlen SE, Dyson K, Frey U, Geiser T, Gerhardsson de Verdier M, Gibeon D, Guo YK, Hashimoto S, Hedlin G, Jeyasingham E, Hekking PW, Higenbottam T, Horvath I, Knox AJ, Krug N, Erpenbeck VJ, Larsson LX, Lazarinis N, Matthews JG, Middelveld R, Montuschi P, Musial J, Myles D, Pahus L, Sandstrom T, Seibold W, Singer F, Strandberg K, Vestbo J, Vissing N, von Garnier C, Adcock IM, Wagers S, Rowe A, Howarth P, Wagener AH, Djukanovic R, Sterk PJ, Chung KF. Clinical and inflammatory characteristics of the European U-BIOPRED adult severe asthma cohort. *The European respiratory journal* 2015.
- E5. Juniper EF, Bousquet J, Abetz L, Bateman ED. Identifying 'well-controlled' and 'not well-controlled' asthma using the Asthma Control Questionnaire. *RespirMed* 2006; 100(4): 616-621.
- E6. Miller MR, Hankinson J, Brusasco V, Burgos F, Casaburi R, Coates A, Crapo R, Enright P, van der Grinten CP, Gustafsson P, Jensen R, Johnson DC, MacIntyre N, McKay R, Navajas D, Pedersen OF, Pellegrino R, Viegi G, Wanger J. Standardisation of spirometry. *The European respiratory journal* 2005; 26(2): 319-338.
- E7. Paggiaro PL, Chanez P, Holz O, Ind PW, Djukanovic R, Maestrelli P, Sterk PJ. Sputum induction. *The European respiratory journal Supplement* 2002; 37: 3s-8s.
- E8. Moore WC, Evans MD, Bleecker ER, Busse WW, Calhoun WJ, Castro M, Chung KF, Erzurum SC, Curran-Everett D, Dweik RA, Gaston B, Hew M, Israel E, Mayse ML, Pascual RM, Peters SP, Silveira L, Wenzel SE, Jarjour NN. Safety of investigative bronchoscopy in the Severe Asthma Research Program. *The Journal of allergy and clinical immunology* 2011; 128(2): 328-336.e323.
- E9. Hanzelmann S, Castelo R, Guinney J. GSVA: gene set variation analysis for microarray and RNA-seq data. *BMC bioinformatics* 2013; 14: 7.
- E10. Harris P, Sridhar S, Peng R, Phillips JE, Cohn RG, Burns L, Woods J, Ramanujam M, Loubeau M, Tyagi G, Allard J, Burczynski M, Ravindran P, Cheng D, Bitter H, Fine JS, Bauer CM, Stevenson CS. Double-stranded RNA induces molecular and inflammatory signatures that are directly relevant to COPD. *Mucosal immunology* 2013; 6(3): 474-484.
- E11. Peng R, Sridhar S, Tyagi G, Phillips JE, Garrido R, Harris P, Burns L, Renteria L, Woods J, Chen L, Allard J, Ravindran P, Bitter H, Liang Z, Hogaboam CM, Kitson C, Budd DC, Fine JS, Bauer CM, Stevenson CS. Bleomycin induces molecular changes directly relevant to idiopathic pulmonary fibrosis: a model for "active" disease. *PloS one* 2013; 8(4): e59348.
- E12. Shi L, Reid LH, Jones WD, Shippy R, Warrington JA, Baker SC, Collins PJ, de Longueville F, Kawasaki ES, Lee KY, Luo Y, Sun YA, Willey JC, Setterquist RA, Fischer GM, Tong W, Dragan YP, Dix DJ, Frueh FW, Goodsaid FM, Herman D, Jensen RV, Johnson CD, Lobenhofer EK, Puri RK, Schrf U, Thierry-Mieg J, Wang C, Wilson M, Wolber PK, Zhang L, Amur S, Bao W, Barbacioru CC, Lucas AB, Bertholet V, Boysen C, Bromley B, Brown D, Brunner A, Canales R, Cao XM, Cebula TA, Chen JJ, Cheng J, Chu TM, Chudin E, Corson J, Corton JC, Croner LJ, Davies C, Davison TS, Delenstarr G, Deng X, Dorris D, Eklund AC, Fan XH, Fang H, Fulmer-Smentek S, Fuscoe JC, Gallagher K, Ge W, Guo L, Guo X, Hager J, Haje PK, Han J, Han T, Harbottle HC, Harris SC, Hatchwell E, Hauser CA, Hester S, Hong H, Hurban P, Jackson SA, Ji H, Knight CR, Kuo WP, LeClerc JE, Levy S, Li QZ, Liu C, Liu Y, Lombardi MJ, Ma Y, Magnuson SR,

171 Maqsodi B, McDaniel T, Mei N, Myklebost O, Ning B, Novoradovskaya N, Orr MS, Osborn TW, Papallo  
 172 A, Patterson TA, Perkins RG, Peters EH, Peterson R, Philips KL, Pine PS, Pustai L, Qian F, Ren H, Rosen  
 173 M, Rosenzweig BA, Samaha RR, Schena M, Schroth GP, Shchegrova S, Smith DD, Staedtler F, Su Z, Sun  
 174 H, Szallasi Z, Tezak Z, Thierry-Mieg D, Thompson KL, Tikhonova I, Turpaz Y, Vallanat B, Van C, Walker  
 175 SJ, Wang SJ, Wang Y, Wolfinger R, Wong A, Wu J, Xiao C, Xie Q, Xu J, Yang W, Zhang L, Zhong S, Zong  
 176 Y, Slikker W, Jr. The MicroArray Quality Control (MAQC) project shows inter- and intraplatform  
 177 reproducibility of gene expression measurements. *Nature biotechnology* 2006; 24(9): 1151-1161.

178

179 Appendix: **The members of the U-BIOPRED Study Group are as follows:**

|                                                                                                                              |
|------------------------------------------------------------------------------------------------------------------------------|
| Adcock Ian, National Heart and Lung Institute, Imperial College, London, UK;                                                 |
| Adriaens Nora, Academic Medical Centre, University of Amsterdam, The Netherlands;                                            |
| Ahmed Hassan, European Institute for Systems Biology and Medicine, CNRS-ENS-UCBL-INSERM, Lyon, France;                       |
| Aliprantis Antonios, Merck Research Laboratories, Boston, USA;                                                               |
| Alving Kjell, Dept Women's & Children's Health, Uppsala University, Sweden                                                   |
| Auffray Charles, European Institute for Systems Biology and Medicine, CNRS-ENS-UCBL-INSERM, Lyon, France;                    |
| Badorrek Philipp, Fraunhofer ITEM; Cornelia Faulenbach, Fraunhofer ITEM;                                                     |
| Bakke Per, Department of Clinical Science, University of Bergen, Bergen, Norway;                                             |
| Balgoma David, Centre for Allergy Research, Karolinska Institutet, Stockholm, Sweden                                         |
| Bansal Aruna T., Acclarogen Ltd, St. John's Innovation Centre, Cambridge, UK;                                                |
| Barber Clair, NIHR Southampton Respiratory Biomedical Research Unit and Clinical and Experimental Sciences, Southampton, UK; |
| Baribaud Frédéric, Janssen R&D, USA;                                                                                         |
| Bates Steward, Respiratory Therapeutic Unit, GSK, UK;                                                                        |
| Bautmans An, MSD, Brussels, BE                                                                                               |
| Behndig Annelie F., Dept of Public Health and Clinical Medicine, Umeå University, Umeå, Sweden;                              |
| Bel Elisabeth, Academic Medical Centre, University of Amsterdam, The Netherlands;                                            |
| Beleta Jorge, Almirall S.A., Barcelona, Spain;                                                                               |
| Berglind Ann, Dept. Women's and Children's Health & Centre for Allergy Research, Karolinska Institutet, Stockholm, Sweden    |

|                                                                                                                                                                  |
|------------------------------------------------------------------------------------------------------------------------------------------------------------------|
| Berton Alix, AstraZeneca, Mölndal, Sweden                                                                                                                        |
| <i>Bigler Jeannette, Previously at: Amgen Inc.;</i>                                                                                                              |
| Bisgaard Hans, COPSAC, Copenhagen Prospective Studies on Asthma in Childhood, Herlev and Gentofte Hospital,<br>University of Copenhagen, Copenhagen, Denmark     |
| Bochenek Grazyna, II Department of Internal Medicine, Jagiellonian University Medical College, Krakow, Poland;                                                   |
| Boedigheimer Michel J., Amgen Inc.;                                                                                                                              |
| Bønnelykke Klaus, COPSAC, Copenhagen Prospective Studies on Asthma in Childhood, Herlev and Gentofte<br>Hospital, University of Copenhagen, Copenhagen, Denmark; |
| Brandsma Joost, University of Southampton, UK                                                                                                                    |
| Braun Armin, Fraunhofer Institute for Toxicology and Experimental Medicine, Hannover, Germany;                                                                   |
| Brinkman Paul, Academic Medical Centre, University of Amsterdam, The Netherlands;                                                                                |
| Burg Dominic, Centre for Proteomic Research, Institute for Life Sciences, University of Southampton, UK                                                          |
| Campagna Davide, Department of Clinical and Experimental Medicine, University of Catania, Italy;                                                                 |
| Carayannopoulos Leon, MSD, USA;                                                                                                                                  |
| Caruso Massimo, Dept. Clinical and Experimental Medicine, University of Catania, Italy;                                                                          |
| Carvalho da Purificação Rocha João Pedro, Royal Brompton and Harefield NHS Foundation Trust, UK;                                                                 |
| Chaiboonchoe Amphun, European Institute for Systems Biology and Medicine, CNRS-ENS-UCBL-INSERM, CIRI-UMR5308, Lyon, France;                                      |
| Chaleckis Romanas, Centre of Allergy Research, Karolinska Institutet, Stockholm, Sweden                                                                          |
| Chanez Pascal, Assistance publique des Hôpitaux de Marseille - Clinique des bronches, allergies et                                                               |

|                                                                                                                                                                                                                  |
|------------------------------------------------------------------------------------------------------------------------------------------------------------------------------------------------------------------|
| sommeil, Aix Marseille Université, Marseille France                                                                                                                                                              |
| Chung Kian F., National Heart and Lung Institute, Imperial College, London, UK;                                                                                                                                  |
| Coleman Courtney, Asthma UK, London, UK;                                                                                                                                                                         |
| Compton Chris, Respiratory Therapeutic Unit, GSK, UK                                                                                                                                                             |
| Corfield Julie, Areteva R&D, Nottingham, UK;                                                                                                                                                                     |
| D'Amico Arnaldo, University of Rome 'Tor Vergata', Rome Italy;                                                                                                                                                   |
| Dahlen Barbro, Karolinska University Hospital & Centre for Allergy Research, Karolinska Institutet, Stockholm, Sweden                                                                                            |
| Dahlén Sven-Erik, Centre for Allergy Research, Karolinska Institutet, Stockholm, Sweden                                                                                                                          |
| De Alba Jorge, Almirall S.A., Barcelona, Spain;                                                                                                                                                                  |
| de Boer Pim, Longfonds, Amersfoort, The Netherlands;                                                                                                                                                             |
| De Lepeleire Inge, MSD, Brussels, BE                                                                                                                                                                             |
| De Meulder Betrand, European Institute for Systems Biology and Medicine, CNRS-ENS-UCBL-INSERM, Lyon, France;                                                                                                     |
| Dekker Tamara, Academic Medical Centre, University of Amsterdam, The Netherlands;                                                                                                                                |
| Delin Ingrid, Centre for Allergy Research, Karolinska Institutet, Stockholm, Sweden                                                                                                                              |
| Dennison Patrick, NIHR Southampton Respiratory Biomedical Research Unit, Clinical and Experimental Sciences, NIHR-Wellcome Trust Clinical Research Facility, Faculty of Medicine, University of Southampton, UK; |
| Dijkhuis Annemiek, Academic Medical Centre, University of Amsterdam, The Netherlands;                                                                                                                            |
| Djukanovic Ratko, NIHR Southampton Respiratory Biomedical Research Unit and Clinical and Experimental Sciences, Southampton, UK;                                                                                 |
| Draper Aleksandra, BioSci Consulting, Maasmechelen, Belgium;                                                                                                                                                     |



|                                                                                                                                                                                                                                                    |
|----------------------------------------------------------------------------------------------------------------------------------------------------------------------------------------------------------------------------------------------------|
| Edwards Jessica, Asthma UK, London, UK;                                                                                                                                                                                                            |
| Emma Rosalia, Department of Clinical and Experimental Medicine, University of Catania, Italy;                                                                                                                                                      |
| Ericsson Magnus, Karolinska University Hospital, Stockholm, Sweden                                                                                                                                                                                 |
| Erpenbeck Veit, Translational Medicine, Respiratory Profiling, Novartis Institutes for Biomedical Research, Basel, Switzerland;                                                                                                                    |
| Erzen Damijan, Boehringer Ingelheim Pharma GmbH & Co. KG; Biberach, Germany                                                                                                                                                                        |
| Fichtner Klaus, Boehringer Ingelheim Pharma GmbH & Co. KG; Biberach, Germany                                                                                                                                                                       |
| Fitch Neil, BioSci Consulting, Maasmechelen, Belgium;                                                                                                                                                                                              |
| Fleming Louis J., National Heart and Lung Institute, Imperial College, London, UK;                                                                                                                                                                 |
| Flood Breda, Asthma UK, UK;                                                                                                                                                                                                                        |
| Fowler Stephen J., Centre for Respiratory Medicine and Allergy, Institute of Inflammation and Repair, University of Manchester and University Hospital of South Manchester, Manchester Academic Health Sciences Centre, Manchester, United Kingdom |
| Frey Urs, University Children's Hospital, Basel, Switzerland;                                                                                                                                                                                      |
| Gahlemann Martina, Boehringer Ingelheim (Schweiz) GmbH, Switzerland;                                                                                                                                                                               |
| Galffy Gabriella, Semmelweis University, Budapest, Hungary;                                                                                                                                                                                        |
| Gallart Hector, Centre for Allergy Research, Karolinska Institutet, Stockholm, Sweden                                                                                                                                                              |
| Garrett Trevor, BioSci Consulting, Maasmechelen, Belgium;                                                                                                                                                                                          |
| Geiser Thomas, Department of Respiratory Medicine, University Hospital Bern, Switzerland;                                                                                                                                                          |
| Gent Julaiha, Royal Brompton and Harefield NHS Foundation Trust, UK;                                                                                                                                                                               |
| Gerhardsson de Verdier Maria, AstraZeneca; Molndal, Sweden;                                                                                                                                                                                        |
| Gibeon David, National Heart and Lung Institute, Imperial College, UK;                                                                                                                                                                             |

|                                                                                                                                                             |
|-------------------------------------------------------------------------------------------------------------------------------------------------------------|
| Gomez Cristina, Centre for Allergy Research, Karolinska Institutet, Stockholm, Sweden                                                                       |
| Gove Kerry, NIHR Southampton Respiratory Biomedical Research Unit and Clinical and Experimental Sciences, Southampton, UK;                                  |
| Gozzard Neil, UCB, UK;                                                                                                                                      |
| Guo Yi-ke, Data Science Institute, Imperial College, UK;                                                                                                    |
| Hashimoto Simone, Academic Medical Centre, University of Amsterdam, The Netherlands;                                                                        |
| Haughney John, International Primary Care Respiratory Group, Aberdeen, Scotland;                                                                            |
| Hedlin Gunilla, Dept. Women's and Children's Health & Centre for Allergy Research, Karolinska Institutet, Stockholm, Sweden;                                |
| Hekking Pieter-Paul, Academic Medical Centre, University of Amsterdam, The Netherlands;                                                                     |
| Henriksson Elisabeth, Karolinska University Hospital & Karolinska Institutet, Stockholm, Sweden                                                             |
| Hewitt Lorraine, NIHR Southampton Respiratory Biomedical Research Unit, Southampton, UK                                                                     |
| Higgenbottam Tim, Allergy Therapeutics, West Sussex, UK;                                                                                                    |
| Hoda Uruj, Imperial College, UK;                                                                                                                            |
| Hohlfeld Jens, Fraunhofer Institute for Toxicology and Experimental Medicine, Hannover, Germany;                                                            |
| Holweg Cecile, Respiratory and Allergy Diseases, Genentech, San Francisco CA;                                                                               |
| Horvath Ildiko, Semmelweis University, Budapest, Hungary;                                                                                                   |
| Howarth Peter, NIHR Southampton Respiratory Biomedical Research Unit, Clinical and Experimental Sciences and Human Development and Health, Southampton, UK; |
| Hu Richard, Amgen Inc.;                                                                                                                                     |
| Hu Sile, National Heart and Lung Institute, Imperial College, UK;                                                                                           |
| Hu Xugang, Amgen Inc.;                                                                                                                                      |

|                                                                                                                            |
|----------------------------------------------------------------------------------------------------------------------------|
| Hudson Val, Asthma UK, London, UK;                                                                                         |
| James Anna J., Centre for Allergy Research, Karolinska Institutet, Stockholm, Sweden;                                      |
| Kamphuis Juliette, Longfonds, Amersfoort, The Netherlands;                                                                 |
| Kennington Erika J., Asthma UK, London, UK;                                                                                |
| Kerry Dyson, CromSource, Stirling UK;                                                                                      |
| Klücklich Matthias, Boehringer Ingelheim Pharma GmbH & Co. KG; Biberach, Germany                                           |
| Knobel Hugo, Philips Research Laboratories, Eindhoven, The Netherlands;                                                    |
| Knowles Richard, Knowles Consulting, UK                                                                                    |
| Knox Alan, Respiratory Research Unit, University of Nottingham, UK;                                                        |
| Kolmert Johan, Centre for Allergy Research, Karolinska Institutet, Stockholm, Sweden                                       |
| Konradsen Jon, Dept. Women's and Children's Health & Centre for Allergy Research, Karolinska Institutet, Stockholm, Sweden |
| Kots Maxim, Chiesi Pharmaceuticals, SPA, Parma, Italy;                                                                     |
| Krueger Linn, University Children's Hospital Bern, Switzerland                                                             |
| Krug Norbert, Fraunhofer Institute for Toxicology and Experimental Medicine, Hannover, Germany;                            |
| Kuo Scott, National Heart and Lung Institute, Imperial College, UK;                                                        |
| Kupczyk Maciej, Centre for Allergy Research, Karolinska Institutet, Stockholm, Sweden                                      |
| Lambrecht Bart, University of Gent, Gent, Belgium;                                                                         |
| Lantz Ann-Sofie, Karolinska University Hospital & Centre for Allergy Research, Karolinska Institutet, Stockholm, Sweden;   |
| Larsson Lars, AstraZeneca, Mölndal, Sweden;                                                                                |
| Lazarinis Nikos, Karolinska University Hospital & Karolinska Institutet, Stockholm, Sweden                                 |

|                                                                                                                          |
|--------------------------------------------------------------------------------------------------------------------------|
| Lefaudeaux Diane, European Institute for Systems Biology and Medicine, CNRS-ENS-UCBL-INSERM, Lyon, France;               |
| Lone-Latif Saeeda, Academic Medical Centre, University of Amsterdam, The Netherlands;                                    |
| Loza Matthew J., Janssen R&D, USA;                                                                                       |
| Lutter Rene, Academic Medical Centre, University of Amsterdam, The Netherlands;                                          |
| Marouzet Lisa, NIHR Southampton Respiratory Biomedical Research Unit, Southampton, UK                                    |
| Martin Jane, NIHR Southampton Respiratory Biomedical Research Unit, Southampton, UK                                      |
| Masefield Sarah, European Lung Foundation, Sheffield, UK;                                                                |
| Mathon Caroline, Centre of Allergy Research, Karolinska Institutet, Stockholm, Sweden                                    |
| Matthews John G., Respiratory and Allergy Diseases, Genentech, San Francisco CA, USA;                                    |
| Mazein Alexander, European Institute for Systems Biology and Medicine, CNRS-ENS-UCBL-INSERM, CIRI-UMR5308, Lyon, France; |
| Meah Sally, National Heart and Lung Institute, Imperial College, UK;                                                     |
| Meiser Andrea, National Heart and Lung Institute, Imperial College, UK;                                                  |
| Menzies-Gow Andrew, Royal Brompton and Harefield NHS Foundation Trust, UK;                                               |
| <i>Metcalf Leanne, Previously at: Asthma UK, London, UK;</i>                                                             |
| Middelveld Roelinde, Centre for Allergy Research, Karolinska Institutet, Stockholm, Sweden                               |
| Mikus Maria, Science for Life Laboratory & The Royal Institute of Technology, Stockholm, Sweden;                         |
| Miralpeix Montse, Almirall, Barcelona, Spain;                                                                            |
| Monk Philip, Synairgen Research Ltd, Southampton, UK;                                                                    |
| Montuschi Paolo, Università Cattolica del Sacro Cuore, Italy;                                                            |
| Mores Nadia, Università Cattolica del Sacro Cuore, Italy;                                                                |

|                                                                                                                                                                                                                                                  |
|--------------------------------------------------------------------------------------------------------------------------------------------------------------------------------------------------------------------------------------------------|
| Murray Clare S., Centre for Respiratory Medicine and Allergy, Institute of Inflammation and Repair, University of Manchester and University Hospital of South Manchester, Manchester Academic Health Sciences Centre, Manchester, United Kingdom |
| Musial Jacek, II Department of Internal Medicine, Jagiellonian University Medical College, Krakow, Poland;                                                                                                                                       |
| Myles David, Respiratory Therapeutic Unit, GSK, UK;                                                                                                                                                                                              |
| Naz Shama, Centre for Allergy Research, Karolinska Institutet, Stockholm, Sweden                                                                                                                                                                 |
| Nething Katja, Boehringer Ingelheim Pharma GmbH & Co. KG; Biberach, Germany                                                                                                                                                                      |
| Nicholas Ben, University of Southampton, UK                                                                                                                                                                                                      |
| Nihlen Ulf, AstraZeneca; Mölndal, Sweden;                                                                                                                                                                                                        |
| Nilsson Peter, Science for Life Laboratory & The Royal Institute of Technology, Stockholm, Sweden;                                                                                                                                               |
| Nordlund Björn, Dept. Women's and Children's Health & Centre for Allergy Research, Karolinska Institutet, Stockholm, Sweden                                                                                                                      |
| Östling Jörgen, AstraZeneca, Mölndal, Sweden;                                                                                                                                                                                                    |
| Pacino Antonio, Lega Italiano Anti Fumo, Catania, Italy;                                                                                                                                                                                         |
| Pahus Laurie, Assistance publique des Hôpitaux de Marseille, Clinique des bronches, allergies et sommeil<br><br>Espace Éthique Méditerranéen, Aix-Marseille Université, Marseille, France;                                                       |
| Palkonen Susanna, European Federation of Allergy and Airways Diseases Patient's Associations, Brussels, Belgium.                                                                                                                                 |
| Pandis Ioannis, Data Science Institute, Imperial College, London, UK;                                                                                                                                                                            |
| Pavlidis Stelios, National Heart and Lung Institute, Imperial College, UK                                                                                                                                                                        |
| Pennazza Giorgio, University of Rome 'Tor Vergata', Rome Italy;                                                                                                                                                                                  |
| Petrén Anne, Centre for Allergy Research, Karolinska Institutet, Stockholm, Sweden                                                                                                                                                               |

|                                                                                                                                                              |
|--------------------------------------------------------------------------------------------------------------------------------------------------------------|
| Pink Sandy, NIHR Southampton Respiratory Biomedical Research Unit, Southampton, UK                                                                           |
| Postle Anthony, University of Southampton, UK                                                                                                                |
| Powel Pippa, European Lung Foundation, Sheffield, UK;                                                                                                        |
| <i>Rahman-Amin Malayka, Previously at: Asthma UK, London, UK;</i>                                                                                            |
| Rao Navin, Janssen R&D, USA;                                                                                                                                 |
| Ravanetti Lara, Academic Medical Centre, University of Amsterdam, The Netherlands;                                                                           |
| Ray Emma, NIHR Southampton Respiratory Biomedical Research Unit, Southampton, UK                                                                             |
| Reinke Stacey, Centre for Allergy Research, Karolinska Institutet, Stockholm, Sweden                                                                         |
| <i>Reynolds Leanne, Previously at: Asthma UK, London, UK;</i>                                                                                                |
| Riemann Kathrin, Boehringer Ingelheim Pharma GmbH & Co. KG; Biberach, Germany                                                                                |
| Riley John, Respiratory Therapeutic Unit, GSK, UK;                                                                                                           |
| Robberechts Martine, MSD, Brussels, BE                                                                                                                       |
| Roberts Amanda, Asthma UK, UK;                                                                                                                               |
| Roberts Graham, NIHR Southampton Respiratory Biomedical Research Unit, Clinical and Experimental Sciences and Human Development and Health, Southampton, UK; |
| Rossios Christos, National Heart and Lung Institute, Imperial College, UK;                                                                                   |
| Rowe Anthony, Janssen R&D, UK;                                                                                                                               |
| Russell Kirsty, National Heart and Lung Institute, Imperial College, UK;                                                                                     |
| Rutgers Michael, Longfonds, Amersfoort, The Netherlands;                                                                                                     |
| Sandström Thomas, Dept of Public Health and Clinical Medicine, Umeå University, Umeå, Sweden;                                                                |
| Santini Giuseppe, Università Cattolica del Sacro Cuore, Italy;                                                                                               |

|                                                                                                                  |
|------------------------------------------------------------------------------------------------------------------|
| Santoninco Marco, University of Rome 'Tor Vergata', Rome Italy;                                                  |
| Schoelch Corinna, Boehringer Ingelheim Pharma GmbH & Co. KG, Biberach, Germany                                   |
| Schofield James P. R., Centre for Proteomic Research, Institute for Life Sciences, University of Southampton, UK |
| Seibold Wolfgang, Boehringer Ingelheim Pharma GmbH, Biberach, Germany                                            |
| Shaw Dominick E., Respiratory Research Unit, University of Nottingham, UK;                                       |
| Sigmund Ralf, Boehringer Ingelheim Pharma GmbH & Co. KG; Biberach, Germany                                       |
| Singer Florian, University Children's Hospital, Zurich, Switzerland;                                             |
| Sjödin Marcus, Centre for Allergy Research, Karolinska Institutet, Stockholm, Sweden                             |
| Skipp Paul J., Centre for Proteomic Research, Institute for Life Sciences, University of Southampton, UK         |
| Smids Barbara, Academic Medical Centre, University of Amsterdam, The Netherlands;                                |
| Smith Caroline, NIHR Southampton Respiratory Biomedical Research Unit, Southampton, UK                           |
| Smith Jessica, Asthma UK, London, UK;                                                                            |
| Smith Katherine M., University of Nottingham, UK;                                                                |
| Söderman Päivi, Dept. Women's and Children's Health, Karolinska Institutet, Stockholm, Sweden                    |
| Sogbesan Adesimbo, Royal Brompton and Harefield NHS Foundation Trust, UK;                                        |
| Sousa Ana R., Respiratory Therapeutic Unit, GSK, UK;                                                             |
| Staykova Doroteya, University of Southampton, UK                                                                 |
| Sterk Peter J., Academic Medical Centre, University of Amsterdam, The Netherlands;                               |
| Strandberg Karin, Karolinska University Hospital & Karolinska Institutet, Stockholm, Sweden                      |
| Sun Kai, National Heart and Lung Institute, Imperial College, UK;                                                |

|                                                                                                                                                                                                                                                |
|------------------------------------------------------------------------------------------------------------------------------------------------------------------------------------------------------------------------------------------------|
| Supple David, Asthma UK, UK;                                                                                                                                                                                                                   |
| Szentkereszty Marton, Semmelweis University, Budapest, Hungary;                                                                                                                                                                                |
| Tamasi Lilla, Semmelweis University, Budapest, Hungary;                                                                                                                                                                                        |
| Tariq Kamran, NIHR Southampton Respiratory Biomedical Research Unit, Clinical and Experimental Sciences, NIHR-Wellcome Trust Clinical Research Facility, Faculty of Medicine, University of Southampton, UK;                                   |
| Thörngren John-Olof, Karolinska University Hospital, Sweden                                                                                                                                                                                    |
| Thornton Bob, MSD, USA;                                                                                                                                                                                                                        |
| Thorsen Jonathan, COPSAC, Copenhagen Prospective Studies on Asthma in Childhood, Herlev and Gentofte Hospital, University of Copenhagen, Copenhagen, Denmark;                                                                                  |
| Valente Salvatore, Università Cattolica del Sacro Cuore, Italy;                                                                                                                                                                                |
| van Aalderen Wim, Academic Medical Centre, University of Amsterdam, The Netherlands;                                                                                                                                                           |
| van de Pol Marianne, Academic Medical Centre, University of Amsterdam, The Netherlands;                                                                                                                                                        |
| van Drunen Kees, Academic Medical Centre, University of Amsterdam, The Netherlands;                                                                                                                                                            |
| van Geest Marleen, AstraZeneca, Mölndal, Sweden;                                                                                                                                                                                               |
| <i>Versnel Jenny, Previously at: Asthma UK, London, UK;</i>                                                                                                                                                                                    |
| Vestbo Jorgen, Centre for Respiratory Medicine and Allergy, Institute of Inflammation and Repair, University of Manchester and University Hospital of South Manchester, Manchester Academic Health Sciences Centre, Manchester, United Kingdom |
| Vink Anton, Philips Research Laboratories, Eindhoven, The Netherlands;                                                                                                                                                                         |
| Vissing Nadja, COPSAC, Copenhagen Prospective Studies on Asthma in Childhood, Herlev and Gentofte Hospital, University of Copenhagen, Copenhagen, Denmark;                                                                                     |



|                                                                                                                                                                                                                                                  |
|--------------------------------------------------------------------------------------------------------------------------------------------------------------------------------------------------------------------------------------------------|
| von Garnier Christophe, University Hospital Bern, Switzerland;                                                                                                                                                                                   |
| Wagener Ariane, Academic Medical Centre, University of Amsterdam, The Netherlands;                                                                                                                                                               |
| Wagers Scott, BioSci Consulting, Maasmechelen, Belgium;                                                                                                                                                                                          |
| Wald Frans, Boehringer Ingelheim Pharma GmbH & Co. KG, Biberach, Germany                                                                                                                                                                         |
| Walker Samantha, Asthma UK, London, UK;                                                                                                                                                                                                          |
| Ward Jonathan, Histochemistry Research Unit, Faculty of Medicine, University of Southampton, Southampton, UK;                                                                                                                                    |
| Weiszhart Zsoka, Semmelweis University, Budapest, Hungary;                                                                                                                                                                                       |
| Wetzel Kristiane, Boehringer Ingelheim Pharma GmbH, Biberach, Germany                                                                                                                                                                            |
| Wheelock Craig E., Centre for Allergy Research, Karolinska Institutet, Stockholm, Sweden;                                                                                                                                                        |
| Wiegman Coen, National Heart and Lung Institute, Imperial College, UK;                                                                                                                                                                           |
| Williams Siân, International Primary Care Respiratory Group, Aberdeen, Scotland;                                                                                                                                                                 |
| Wilson Susan J., Histochemistry Research Unit, Faculty of Medicine, University of Southampton, Southampton, UK;                                                                                                                                  |
| Woodcock Ashley, Centre for Respiratory Medicine and Allergy, Institute of Inflammation and Repair, University of Manchester and University Hospital of South Manchester, Manchester Academic Health Sciences Centre, Manchester, United Kingdom |
| Yang Xian, National Heart and Lung Institute, Imperial College, UK;                                                                                                                                                                              |
| Yeyasingham Elizabeth, UK Clinical Operations, GSK, Stockley Park, UK;                                                                                                                                                                           |
| Yu Wen, Amgen Inc.;                                                                                                                                                                                                                              |
| Zetterquist Wilhelm, Dept. Women's and Children's Health & Centre for Allergy Research, Karolinska Institutet, Stockholm, Sweden                                                                                                                 |
| Zwinderman Koos, Academic Medical Centre, University of Amsterdam, The Netherlands;                                                                                                                                                              |
