# Supplementary material
Source: HighWire-hosted journal article supplement (https://erj.ersjournals.com/content/50/3/1602298)
Supplement: inline-supplementary-material-2 [file inline-supplementary-material-2.pdf]

| Table E7: Details on significantly different enriched gene signatures |                               |         |                                             |           |                                                                                                                                                                                                                                                                              |                                                                                                       |
|-----------------------------------------------------------------------|-------------------------------|---------|---------------------------------------------|-----------|------------------------------------------------------------------------------------------------------------------------------------------------------------------------------------------------------------------------------------------------------------------------------|-------------------------------------------------------------------------------------------------------|
| #                                                                     | Tissue                        | Species | Trigger                                     | Direction | Gene Set                                                                                                                                                                                                                                                                     | Source                                                                                                |
| 12                                                                    | Bronchial epithelia           | HS      | Fluticasone in asthma                       | DOWN      | TFCP2L1, HBB, MUC13, POSTN, SERPINB2                                                                                                                                                                                                                                         | <a href="http://www.ncbi.nlm.nih.gov/pubmed/17898169">http://www.ncbi.nlm.nih.gov/pubmed/17898169</a> |
| 27                                                                    | Peripheral blood - CD4 Tcells | HS      | Rheumatoid Arthritis                        | UP        | BCL3, SOCS3, PIM1, SBNO2, LDHA, CMAHP, PDCD1, IGFL1, LOC731186, MUC1, GPRIN3                                                                                                                                                                                                 | <a href="http://www.ncbi.nlm.nih.gov/pubmed/22532634">http://www.ncbi.nlm.nih.gov/pubmed/22532634</a> |
| 34                                                                    | Lung biopsy                   | HS      | Fluticasone in COPD                         | DOWN      | TMPRSS11D, SERPINB13, SPINK5, KRT4, TMPRSS11A, CSTA, GABRP, TYMS, GPR87, TMPRSS4, ATP10B, CH25H, SRPX2, IGKC, BNIPL, RAB38, CAPNS2, FANCD2, ABCC1, TENM2, BNC1, KLK10, PTAFR, CRABP2, TENM4, TRIM16, EYA2, GNA15, SMAGP, BICD2, EXOSC7, SCO1, BID, RHNO1, ITPA, TSPAN17      | <a href="http://www.ncbi.nlm.nih.gov/pubmed/23925644">http://www.ncbi.nlm.nih.gov/pubmed/23925644</a> |
| 36                                                                    | Peripheral blood              | HS      | Systemic lupus erythematosus (SLE) and PBMC | UP        | IFI35, IRF7, MX1, MX2, XIAP, IFI44L, OAS2, LY6E, AGRN, IFIT1, RSAD2, ISG15, IFIT3, CCL2, TDRD7, PLSCR1, ACSL1, TNFSF10, OAS1, GBP1, SERPING1, FCGR1A, C2, TYMP, STAT1, LAMP3, LGALS3BP, IFITM3, TAP1, IFI6, APOBEC3F, APOBEC3C, APOBEC3B, APOBEC3A, APOBEC3D, APOBEC3G, G6PD | <a href="http://www.ncbi.nlm.nih.gov/pubmed/12642603">http://www.ncbi.nlm.nih.gov/pubmed/12642603</a> |
| 55                                                                    | Eosinophils (BAL)             | HS      | Mild Asthma, Whole Lung                     | UP        | ADAM28, CNR2, FFAR3, LGALS12, PRSS33, SPNS3, ADAM8, CORO1A, FHL3, LTC4S, RAB37, TESC, ARAP3, CYP4F12, GGT5, MCTP2, RAB3D, TNFSF14, ASB2, DACH1, GPR56, MMP25, RD3,                                                                                                           | <a href="http://www.ncbi.nlm.nih.gov/pubmed/23844029">http://www.ncbi.nlm.nih.gov/pubmed/23844029</a> |

|    |             |    |                    |    |                                                                                                                                                                                                                                                                                                                                                                                                                                                                                                                                                          |                                                                                                       |
|----|-------------|----|--------------------|----|----------------------------------------------------------------------------------------------------------------------------------------------------------------------------------------------------------------------------------------------------------------------------------------------------------------------------------------------------------------------------------------------------------------------------------------------------------------------------------------------------------------------------------------------------------|-------------------------------------------------------------------------------------------------------|
|    |             |    | Allergen Challenge |    | TREML2, ATP2A3, DAPK2, GPR97, NHSL2, RNASE2, TRPM6, CASS4, DGKD, ICAM3, P2RY2, RNASE3, TSPAN18, CD300LB, EMP4P, IFITM1, PADI2, SIGLEC10, VSTM1, CD69, FAM101B, IL1RL1, PADI4, SIGLEC8, CDA, FAM65B, IL5RA, PGLYRP1, SLC24A3, CHST15, FFAR2, KIF21B, PIK3R6, SORL1                                                                                                                                                                                                                                                                                        |                                                                                                       |
| 57 | Lung biopsy | MM | Poly(I:C) - 2hr    | UP | CXCL10, IFIT1B, MX1, MX1, OASL, IFIT2, CMPK2, HAS2, RSAD2, HAS1, RSAD2, CXCL11, CSF1, TNFAIP6, IFIT1B, GBP2, RSAD2, RTP4, IRGM, RND1, GBP4, RTP4, IFIH1, IRGM, CMPK2, HAS2, CXCL9, IRGM, IFNB1, CSF1, IL6, ADAMTS4, STAT1, PTX3, GEM, TNFAIP3, PARP14, GBP6, ADAMTS4, DDX58, PYHIN1, FAM26F, TNFAIP2, USP18, MMP13, CCL4, CCL8, CCL11, PYHIN1, MT1H, PLSCR2, TNFAIP3, VCAM1, ADM, CXCL11, C12orf75, ATF3, CP, CCL20, CXCL9, TIMP1, SLFN11, HPX, SAA1, IFI44L, CCL22, NTS, CH25H, IRG1, IFI44L, FGG, MT1A, RGS16, CXCL3, CXCL3, CXCL3, CXCL6, CXCL8, LEP, | <a href="http://www.ncbi.nlm.nih.gov/pubmed/22990623">http://www.ncbi.nlm.nih.gov/pubmed/22990623</a> |
| 58 | Lung biopsy | MM | Poly(I:C) - 6hr    | UP | NHLH1, CMPK2, IFIT2, CMPK2, GBP4, MX1, RSAD2, TOR3A, CD274, HERC6, DDX58, HERC6, HERC6, SAMD9L, STAT1, HERC6, GBP4, GBP2, GBP4, RNF213, MX1, ZNFX1, MITD1, PARP14, CXCL10, IRGM, GBP2, SETDB2, STAT1, IFIT1B, EIF2AK2, ENPP4, WARS, IRGM, IRGM, ATM, ASB13, WDR19, OASL, PML, PML, TLR3, IFIH1,                                                                                                                                                                                                                                                          | <a href="http://www.ncbi.nlm.nih.gov/pubmed/22990623">http://www.ncbi.nlm.nih.gov/pubmed/22990623</a> |

|  |  |  |  |  |                                                                                                                                                                                                                                                                                                                                                                                                                                                                                                                                                                                                                                                                                                                                                                                                                                                                                                                                                                                                                                                                                                                                                                                                                                                      |  |
|--|--|--|--|--|------------------------------------------------------------------------------------------------------------------------------------------------------------------------------------------------------------------------------------------------------------------------------------------------------------------------------------------------------------------------------------------------------------------------------------------------------------------------------------------------------------------------------------------------------------------------------------------------------------------------------------------------------------------------------------------------------------------------------------------------------------------------------------------------------------------------------------------------------------------------------------------------------------------------------------------------------------------------------------------------------------------------------------------------------------------------------------------------------------------------------------------------------------------------------------------------------------------------------------------------------|--|
|  |  |  |  |  | RTP4, TOR3A, IFIT1B, SLFN11, ASB13, DDX60, STAT2, PARP11, TRIM5, STAT2, STAT1, TOR3A, TRIM6, RBL1, CXCL11, WDR19, DDX58, PARP9, TRIM21, USP18, WARS, DDX60, GBP2, DTX3L, IL15, GBP6, ENPP4, SLFN11, SECTM1, ADAR, MLKL, XAF1, RSAD2, INPP1, ZUFSP, WARS, MITD1, TRAFD1, RTP4, DHX58, UBE2L6, IDO1, LY6E, STAT1, IFI35, RSAD2, TRIM34, NAMPT, GNB4, CXCL9, NMI, IFI35, CXCL9, PLSCR2, PNPT1, HAS2, TRIM14, NLRC5, CXCL11, PYHIN1, DDX58, IRF9, HAP1, ZBP1, BATF2, IRF7, PYHIN1, DTX3L, DAXX, ZBP1, IFI44, KATNA1, SPATS2L, ADAR, Mar-05, PNP, NCOA7, SLFN5, FAM26F, SP100, IFI44L, RAB19, CX3CL1, ZNF836, PLEKHA4, SLFN11, ISG20, MISP, IFI44L, SERPINA3, CD40, SPPL2A, IFNB1, AIM1, MMP13, UBA7, ADAR, VCAM1, ZC3HAV1, SPATS2L, IFI44L, ATM, TOR1AIP2, TTC39B, DHX58, TMEM171, MOV10, CD40, PAPD7, TNFAIP6, SLFN12, PSMB8, LGALS9C, PARP14, ASAP3, TTC39B, HAS2, PSMB9, TAPBPL, ZSWIM5, CCRL2, CD40, CASP4, ATP10A, AREL1, DCP2, IL6, CCL5, UPP1, SLFN5, ECE2, APOL6, GCH1, CTRL, SP100, CX3CL1, CSF1, LAG3, IL18BP, TTC39B, TMEM106A, PNPT1, SPATS2L, TRIM25, RNF114, PLAC8, FCGR1A, SLC15A3, USP25, NAMPT, SLFN12, EPSTI1, GGT5, XAF1, CD69, CACNB4, SOCS1, MS4A4A, TLR2, ATF3, OAS3, SAMHD1, PYHIN1, GCH1, PPP1R14D, ASB13, TRIM5, LYPD8, NFKBIE, |  |
|--|--|--|--|--|------------------------------------------------------------------------------------------------------------------------------------------------------------------------------------------------------------------------------------------------------------------------------------------------------------------------------------------------------------------------------------------------------------------------------------------------------------------------------------------------------------------------------------------------------------------------------------------------------------------------------------------------------------------------------------------------------------------------------------------------------------------------------------------------------------------------------------------------------------------------------------------------------------------------------------------------------------------------------------------------------------------------------------------------------------------------------------------------------------------------------------------------------------------------------------------------------------------------------------------------------|--|

|  |  |  |  |  |                                                                                                                                                                                                                                                                                                                                                                                                                                                                                                                                                                                                                                                                                                                                                                                                                                                                                                                                     |  |
|--|--|--|--|--|-------------------------------------------------------------------------------------------------------------------------------------------------------------------------------------------------------------------------------------------------------------------------------------------------------------------------------------------------------------------------------------------------------------------------------------------------------------------------------------------------------------------------------------------------------------------------------------------------------------------------------------------------------------------------------------------------------------------------------------------------------------------------------------------------------------------------------------------------------------------------------------------------------------------------------------|--|
|  |  |  |  |  | <p> ARHGAP8, CSF1, CASP1, ZC3HAV1, PLA1A, BRIP1, CD86, SOCS1, CCL8, LGALS3BP, OSMR, CCL4, ETNK1, OAS2, TIFA, EPSTI1, ARID5A, PPA1, XDH, TNFAIP3, CNR1, NFKBIE, MS4A4A, ERVFRD-1, CA13, PARP11, MARCKSL1, VCAM1, GLIPR2, LRRC4, SECTM1, GEM, RND1, PTX3, ARSI, AFTPH, NPC2, VCAN, GLIPR2, DNASE1L3, ABTB2, MS4A6A, SLC2A6, CA13, FRAS1, PAPSS2, MXD1, HSPBAP1, B2M, FAP, SLFN5, PCGF5, VCAM1, EPSTI1, MB21D1, ADAMTS4, PTPN2, IFNG, FCGR1A, GZMB, VCAN, POU3F1, CA13, TFPI2, TNFAIP3, VNN1, PML, IAPP, UBD, IRG1, ADAMTS6, IAPP, IAPP, RTN4RL2, DCK, TNFAIP2, RGS1, BCL3, CSRNP1, SLFN12, ADAMTS4, MT1H, KLRK1, VNN1, MSR1, IL12B, CH25H, NTS, CCL22, PYHIN1, IL1RN, TNF, CP, SOCS3, RAD54B, CCR2, TIMD4, TIMP1, XCL2, NAV3, IFITM1, HPX, DDX4, MS4A6A, GZMA, DCK, FCGR3B, CXorf21, NCR2, GPR84, MBD1, MSR1, IL1RN, SELP, IL1RN, MSR1, NCR1, SAA1, SLFN12, CCL3L1, MT1A, CXCL3, FGG, CXCL3, RGS16, CXCL3, ORM2, C15orf48, CXCL8 </p> |  |
|--|--|--|--|--|-------------------------------------------------------------------------------------------------------------------------------------------------------------------------------------------------------------------------------------------------------------------------------------------------------------------------------------------------------------------------------------------------------------------------------------------------------------------------------------------------------------------------------------------------------------------------------------------------------------------------------------------------------------------------------------------------------------------------------------------------------------------------------------------------------------------------------------------------------------------------------------------------------------------------------------|--|

|    |             |    |                  |    |                                                                                                                                                                                                                                                                                                                                                                                                                                                                                                                                                                                                                                                                                                                                                                                                                                                                                                                                                                                                                                                                                                                                                                                     |                                                                                                              |
|----|-------------|----|------------------|----|-------------------------------------------------------------------------------------------------------------------------------------------------------------------------------------------------------------------------------------------------------------------------------------------------------------------------------------------------------------------------------------------------------------------------------------------------------------------------------------------------------------------------------------------------------------------------------------------------------------------------------------------------------------------------------------------------------------------------------------------------------------------------------------------------------------------------------------------------------------------------------------------------------------------------------------------------------------------------------------------------------------------------------------------------------------------------------------------------------------------------------------------------------------------------------------|--------------------------------------------------------------------------------------------------------------|
| 62 | Lung biopsy | MM | Poly(I:C) - 48hr | UP | <p>IRF7, APOD, ZBP1, IFI44L, CXCL10, GBP4, PYHIN1, PYHIN1, ZBP1, IFI44, CXCL9, IFIT1B, CXCL11, LY6E, LGALS3BP, USP18, DDX60, SIGLEC1, GBP6, RTP4, LAIR2, MX1, IFI44L, BST2, MX1, RTP4, MS4A6A, XAF1, C3AR1, DDX60, SLAMF9, C3AR1, CMPK2, STAT1, CCR2, FCGR1A, OASL, IFIT2, MS4A4A, FCGR1A, OAS3, C3AR1, LAIR2, IL18BP, OAS2, AIF1, DHX58, LAIR2, CCR2, IRGM, HERC6, TM4SF5, APOC2, SLFN12, MS4A7, CNGB3, MS4A4A, MS4A6A, HERC6, IFI44L, APOBEC1, CCR2, FCGR2A, HERC6, RSAD2, PLA1A, MSR1, CXCL9, GDF3, TIMP1, IL12B, RSAD2, SLFN11, CLEC4A, CCR2, SIRPG, HERC6, B2M, SAA1, IFI27, NLRC5, CLEC4A, CCR2, FCGR2A, EPSTI1, CCL5, CLEC5A, BEX4, CCR2, CD72, SLFN12, MSR1, EPSTI1, TRIM5, MILR1, STAT1, XCL2, FCGR2A, FCGR2A, LPXN, DCK, GPR114, GPR65, MSR1, LST1, VNN1, DHX58, FAM26F, RSAD2, CCR1, MSR1, SAA4, CCL4, CCL8, NCR2, CXCL3, PYHIN1, CCR9, KLRK1, GZMK, IRG1, HAVCR1, PARP14, CCR2, MS4A7, RGS1, CXCL3, CXCL3, KLK1, CH25H, FYB, CXorf21, HPX, GPR35, CD180, FCGR3B, CXCL13, SLFN12, IL6, TLR1, KLK1, CXCL6, ORM2, TNFRSF9, CA13, KLK1, KLRB1, GZMB, C15orf48, EMR3, RGS16, CXCL13, ADAMTS4, CYBB, CXCL11, IL1RN, RFPL3, SLC26A4, CXCL8, UBD, CCL3L1, IFNG, IL1RN, ORM2</p> | <p><a href="http://www.ncbi.nlm.nih.gov/pubmed/22990623">http://www.ncbi.nlm.nih.gov/pubmed/22990623</a></p> |
|----|-------------|----|------------------|----|-------------------------------------------------------------------------------------------------------------------------------------------------------------------------------------------------------------------------------------------------------------------------------------------------------------------------------------------------------------------------------------------------------------------------------------------------------------------------------------------------------------------------------------------------------------------------------------------------------------------------------------------------------------------------------------------------------------------------------------------------------------------------------------------------------------------------------------------------------------------------------------------------------------------------------------------------------------------------------------------------------------------------------------------------------------------------------------------------------------------------------------------------------------------------------------|--------------------------------------------------------------------------------------------------------------|

|    |             |    |                   |    |                                                                                                                                                                                                                                                                                                                                                                                    |                                                                                                       |
|----|-------------|----|-------------------|----|------------------------------------------------------------------------------------------------------------------------------------------------------------------------------------------------------------------------------------------------------------------------------------------------------------------------------------------------------------------------------------|-------------------------------------------------------------------------------------------------------|
| 64 | Lung biopsy | MM | Poly(I:C) - 72hr  | UP | IRF7, APOD, CCNA1, PYHIN1, IFI44L, TOMM20L, PYHIN1, IFI44, IFI27, IFI44L, IFIT1B, MS4A7, OAS2, CXCL10, MX1, DDX60, ZBP1, CCR2, C3AR1, ZBP1, SPAG5, CXCL9, SAA1, CCDC67, CCR2, FCGR1A, KLK1, KLK1, OAS3, MX1, MS4A4A, SRSF11, NCAPG, CDK10, CEP55, MS4A4A, CCR2, ESCO2, CCR2, OASL, RGS1, SLFN12, IL12B, KLK1, ORM2, CXCL11, CXCL8, IRG1, CXCL3, CXCL3, CXCL3, SLC26A4, AGR2, CLCA1 | <a href="http://www.ncbi.nlm.nih.gov/pubmed/22990623">http://www.ncbi.nlm.nih.gov/pubmed/22990623</a> |
| 65 | Lung biopsy | MM | Poly(I:C) - 96hr  | UP | APOD, IRF7, MS4A7, PYHIN1, C3AR1, C3AR1, CCL8, CCR2, MS4A7, PYHIN1, CCR2, C3AR1, CCNA1, IFI44L, SPAG5, TOMM20L, MX1, CDK10, CXCL9, IFI27, IL12B, SAA1, CEP55, OAS2, HAL, IFI44L, ESCO2, CXCL10, RGS1, HMMR, CH25H, CXCL11, ESCO2, C15orf48, ORM2, CXCL8, IRG1, AGR2                                                                                                                | <a href="http://www.ncbi.nlm.nih.gov/pubmed/22990623">http://www.ncbi.nlm.nih.gov/pubmed/22990623</a> |
| 67 | Lung biopsy | MM | Bleomycin - 1day  | UP | GDF15, AEN, CCNG1, CDKN1A, EDA2R, CELF5, DDIAS, PSRC1, THEM5, PSAPL1, SAA1, CXCL3, CXCL10, RSAD2, ORM2, CCL20, CXCL6, TIMP1, CXCL8, CCL8, SLC26A4, IL6, ADAMTS4, CXCL9                                                                                                                                                                                                             | <a href="http://www.ncbi.nlm.nih.gov/pubmed/23565148">http://www.ncbi.nlm.nih.gov/pubmed/23565148</a> |
| 68 | Lung biopsy | MM | Bleomycin - 2days | UP | HERC6, VCAN, RSAD2, MX1, IFIT1B, DHX58, IFI44, IRF7, CXCL11, CXCL10, OAS3, FCGR1A, GDF15, MS4A6A, CXCL8, ZBP1, OASL, CYP7B1, DDIAS, SAA1, EDA2R, OAS2, APOD, SERPINA3, CELF5, CXCL3, TIMP1, PSRC1, CCL8, SECTM1, C15orf48, CCR2, CH25H, ORM2, MSR1, FOSL1, IRG1, CXCL6, SPINK1, LIF, SLFN12, IL6, CXCL9, IL1RN, EREG,                                                              | <a href="http://www.ncbi.nlm.nih.gov/pubmed/23565148">http://www.ncbi.nlm.nih.gov/pubmed/23565148</a> |

|            |                       |           |                    |      |                                                                                                                                                                                                                                                      |                                                                                                       |
|------------|-----------------------|-----------|--------------------|------|------------------------------------------------------------------------------------------------------------------------------------------------------------------------------------------------------------------------------------------------------|-------------------------------------------------------------------------------------------------------|
|            |                       |           |                    |      | MORC1, CXCL13, TNC, CHL1, CD177, BCAT1, ADAMTS4, SPRR1B,                                                                                                                                                                                             |                                                                                                       |
| <b>77</b>  | <b>Lung biopsy</b>    | <b>MM</b> | Bleomycin - 28days | DOWN | BEX2, TMEM132D, SLC4A1, FABP1, TBX20, KCNJ3, TRDN                                                                                                                                                                                                    | <a href="http://www.ncbi.nlm.nih.gov/pubmed/23565148">http://www.ncbi.nlm.nih.gov/pubmed/23565148</a> |
| <b>101</b> | <b>Lung brushings</b> | <b>HS</b> | IL-13              | UP   | ADAMTS9, ALOX15, BCL2L15, C1QTNF1, CA2, CCBL1, CCL26, CD274, CD44, CDH26, CISH, CST1, CST2, CST4, CTSC, DPP4, FAM26E, FETUB, GGH, HS3ST1, LRRC31, NTRK1, NABP1, PCSK6, POSTN, SERPINB4, SH2D1B, SIDT1, SLC26A4, SLC39A8, SLC5A1, SOCS1, SUSD2, USP54 | ADEPT cohort                                                                                          |

*HS: Human sample, IVV: In vitro sample; MM: Murine model*
