# Supplementary material
Source: HighWire-hosted journal article supplement (https://erj.ersjournals.com/content/50/3/1602298)
Supplement: inline-supplementary-material-3 [file inline-supplementary-material-3.pdf]

| Table E8: All predefined gene sets entered into gene set variation analysis |                                                                                                                                                                                                                                                                                                                                                                                                                                                                                                                                                                                                       |                                                                                                       |
|-----------------------------------------------------------------------------|-------------------------------------------------------------------------------------------------------------------------------------------------------------------------------------------------------------------------------------------------------------------------------------------------------------------------------------------------------------------------------------------------------------------------------------------------------------------------------------------------------------------------------------------------------------------------------------------------------|-------------------------------------------------------------------------------------------------------|
| #                                                                           | Gene Set                                                                                                                                                                                                                                                                                                                                                                                                                                                                                                                                                                                              | Source                                                                                                |
| 1                                                                           | LDLRAP1, ASPM, BCL11B, MIS18A, CAMK4, CCNA2, CCNB1, CCNB2, CD3D, CD3E, CD3G, CD5, CD6, CD8A, CD8BP, CD8B, CDK1, CPOX, CTLA4, CXCR6, DGKA, DNAJB1, DUSP2, EGLN3, PRR11, GPR15, GZMK, H2AFX, HDGFRP3, PIK3IP1, HMMR, ICOS, IL22, IL9, INPP4B, KIF14, LAG3, LEF1, LEPROTL1, LRRN3, MELK, TAF1D, MKI67, PAICS, PRC1, ATAD2, DUSP4, RRM1, DEPDC1, AURKA, TCF7, TRAC, TOP2A, TPX2, TRAT1, UBE2C, UBE2S, ZBED2, ZWINT, HAUS1, NUF2, CDCA2, CDCA5, DHX33, STAMBP1, MTFR2, TRDV3, AC017002.1, GPATCH4, MTHFD1L, UBE2T, IL17F, OXNAD1, ZBED6CL, NDFIP2, NDNL2, TRAV12-1, TRIM59, ZNRF1                          | <a href="http://www.ncbi.nlm.nih.gov/pubmed/15789058">http://www.ncbi.nlm.nih.gov/pubmed/15789058</a> |
| 2                                                                           | AMPD1, PPOX, BANK1, BCL11A, TNFRSF17, BLK, BLNK, BMP8B, STAP1, VCPKMT, C19orf10, EDEM2, CD19, MS4A1, CD79A, CD79B, KLF6, DDOST, EAF2, EIF2AK3, ELL2, PDIA4, FCRL2, FKBP11, FAM46C, TXNDC15, TMEM156, GNG7, GPRC5D, WHSC1L1, SPCS2, SEL1L3, LZTFL1, MAN1A1, MANEA, NXPE3, NGLY1, OSBPL10, MZB1, PAX5, SUB1, PNOC, POU2AF1, QRSL1, RPN1, SEC24A, KDM5D, SPATS2, SPIB, SSR1, HSPA13, TCF3, TCL1A, SEC62, HSP90B1, TRAM1, TRAM2, UBE2G1, UBE2J1, EZR, VPRED3, FAM129C, PRDM15, CPNE5, LINC00926, ERN1, FBXO18, FCRL1, EME1, DERL3, FCRLA, PPAPDC1B, FCRL5, KLHL14, TXNDC11, NLRP7, RALGPS2, TLR10, WNT10A | <a href="http://www.ncbi.nlm.nih.gov/pubmed/15789058">http://www.ncbi.nlm.nih.gov/pubmed/15789058</a> |
| 3                                                                           | ATP13A3, AP1S2, BHLHE41, CASP1, CCL24, CCRL2, CD1D, CDK5RAP2, CLEC5A, VCAN, CTSD, CTSL, CXCL1, CXCL3, CXCL5, CYBB, DFNA5, HBEGF, DUSP6, EREG, THBS1, PID1, GNA15, HS3ST3B1, IER3, IL19, IL1A, IL1B, IL36G, IL1RN, IL24, IL3RA, IL6, MTF1, MMP1, MMP14, MMP19, MMP9, NPC1, NRIP3, PFKFB3, PLAUR, PLD3, PPBP, PPIF, PTX3, RNU2-1, PHACTR1, SERPINB2, SERPINB7, SLC28A3, SLC31A1, SLC3A2, SRC, TCIRG1, TFPI2, NEAT1, TNFSF15, ZFYVE16, POMZP3, LINC00158, LINC00936, RP11-384O8.1, GJB2, GPR84, PNPLA8, IRAK2, DNAJC5B, MPEP1, MS4A6A, GLIS3, PLD1, PRAM1, SGPP2, SNX9                                   | <a href="http://www.ncbi.nlm.nih.gov/pubmed/15789058">http://www.ncbi.nlm.nih.gov/pubmed/15789058</a> |

|           |                                                                                                                                                                                                                                                                                                                                                                                                                                                                                                                                   |                                                                                                       |
|-----------|-----------------------------------------------------------------------------------------------------------------------------------------------------------------------------------------------------------------------------------------------------------------------------------------------------------------------------------------------------------------------------------------------------------------------------------------------------------------------------------------------------------------------------------|-------------------------------------------------------------------------------------------------------|
| <b>4</b>  | CD244, CHST12, CLIC3, IVNS1ABP, IVNS1ABP, KIR3DL2, KIR3DL1, KIR2DL2, KIR2DL4, KIR2DS4, KIR2DS5, KIR2DS5, KIR3DS1, KLRF1, NS1-BP, PTGDR, TGFBR1, YPEL1                                                                                                                                                                                                                                                                                                                                                                             | <a href="http://www.ncbi.nlm.nih.gov/pubmed/15789058">http://www.ncbi.nlm.nih.gov/pubmed/15789058</a> |
| <b>5</b>  | ABTB2, ADAM12, ALOX15, CBR3, CCL13, CCL17, CD1A, CD1B, CD1E, CD86, N4BP2L1, CHST7, CLEC10A, CLIC2, CRLF2, CXCL11, EHD4, TRAFD1, FSCN1, IFI6, GRSF1, H6PD, HLA-DQA1, HLA-DQB1, HMG20B, HMOX1, IFIT1, CD209, CERS6, IFIH1, POGLUT1, MFSD12, MMP12, MX1, NAGPA, NR4A3, OAS1, SLC05A1, PDCD1LG2, RAB30, RAB9A, RASSF4, ARHGAP22, SLC27A3, SIGLEC1, SPRED2, TBC1D13, UBD, CNOT10, TIFAB, MAP3K13, WFDC21P, NAA25, GPR157, L3MBTL4, KDM2B, SRGAP2, NFXL1, ZNFX1, C17orf58, NEURL3, MOB1B, NT5C3AP1, AKT1S1, NUB1, BLOC1S6, PVRL2, TTYH2 | <a href="http://www.ncbi.nlm.nih.gov/pubmed/15789058">http://www.ncbi.nlm.nih.gov/pubmed/15789058</a> |
| <b>6</b>  | ABTB1, AMPD2, FAM53C, CCR3, CDA, CMTM2, CLC, CREB5, CTBS, CTBS, DICER1, MSL1, FCGR2B, FCGR3B, FCGR3B, MANSC1, FPR2, FRAT2, GPR27, FFAR2, HSPA6, CXCR1, CXCR2, TMCC1, SLC45A4, KRT23, MBOAT7, TSEN34, MXD1, YPEL3, CEP19, R3HDM4, MPPE1, SLC25A37, NCF4, NRBF2, PHC2, PROK2, RALB, RNF141, SEC14L1, MSRB1, STX3, TSPAN16, VMP1, VNN2, XPO6                                                                                                                                                                                         | <a href="http://www.ncbi.nlm.nih.gov/pubmed/15789058">http://www.ncbi.nlm.nih.gov/pubmed/15789058</a> |
| <b>7</b>  | FCGR2A, FCGR2C, CXCR1, CXCR2, FPR1, MME                                                                                                                                                                                                                                                                                                                                                                                                                                                                                           | <a href="http://www.ncbi.nlm.nih.gov/pubmed/27677865">http://www.ncbi.nlm.nih.gov/pubmed/27677865</a> |
| <b>8</b>  | CCL26, LOXL4, NOS2, CD36, CDH13, JAM2, HIGD1B, CLCA1, FZD5, CST2, IGHE, ATP5J, ALOX15, FETUB, AADAC, TOX2, LYPD1, CYR1, HS3ST4, CST1, KRT31, IL1R2, NKX1-2, TUBAL3, PRKD1                                                                                                                                                                                                                                                                                                                                                         | <a href="http://www.ncbi.nlm.nih.gov/pubmed/21819959">http://www.ncbi.nlm.nih.gov/pubmed/21819959</a> |
| <b>9</b>  | CLCA1, POSTN, PRR4, SERPINB2, CPA3, TPSB2, TPSAB1, C16orf54, STOM, ZMAT2, AHDC1, EVC2                                                                                                                                                                                                                                                                                                                                                                                                                                             | <a href="http://www.ncbi.nlm.nih.gov/pubmed/17898169">http://www.ncbi.nlm.nih.gov/pubmed/17898169</a> |
| <b>10</b> | GPR115, DMXL2, STEAP4, MUC5B, SCNN1G, TMEM45A, SCGB3A1                                                                                                                                                                                                                                                                                                                                                                                                                                                                            | <a href="http://www.ncbi.nlm.nih.gov/pubmed/17898169">http://www.ncbi.nlm.nih.gov/pubmed/17898169</a> |
| <b>11</b> | FKBP5, GAS1, PHACTR3, FAM107A, HIF3A, TSC22D3, KLF9, HCAR3, PER1, C6, SORD, LINC00964, FXYD1, AHNK2, WIPI1, CST1, CLCA1                                                                                                                                                                                                                                                                                                                                                                                                           | <a href="http://www.ncbi.nlm.nih.gov/pubmed/17898169">http://www.ncbi.nlm.nih.gov/pubmed/17898169</a> |

|           |                                                                                                                                                                                                                                                                                                                                                                                                                                                                                           |                                                                                                       |
|-----------|-------------------------------------------------------------------------------------------------------------------------------------------------------------------------------------------------------------------------------------------------------------------------------------------------------------------------------------------------------------------------------------------------------------------------------------------------------------------------------------------|-------------------------------------------------------------------------------------------------------|
| <b>12</b> | TFCP2L1, HBB, MUC13, POSTN, SERPINB2                                                                                                                                                                                                                                                                                                                                                                                                                                                      | <a href="http://www.ncbi.nlm.nih.gov/pubmed/17898169">http://www.ncbi.nlm.nih.gov/pubmed/17898169</a> |
| <b>13</b> | CCL26, PTCHD4, CLCA1, CST1, TUBAL3, CST2, CDH13, JAM2, NOS2, NTRK1, TMEM132B, PTGDR2, ZNF436, IL1R2, IGHE, FETUB, HIGD1B, TOX2, GRM8, NAGS, KRT31, KRT34, ATP5J, FZD5, LOXL4, NKX1-2, AADAC, DOK1, HRH1, CYR1, CTDSPL, NOVA2, WWC2-AS2, PRKD1, CEP72, SLCO2A1, CD36, DISP1, LYPD1, ADM5, ALOX15, FAM124B                                                                                                                                                                                  | <a href="http://www.ncbi.nlm.nih.gov/pubmed/21187436">http://www.ncbi.nlm.nih.gov/pubmed/21187436</a> |
| <b>14</b> | IRS2, CXCL6, FOLR1, DUSP1, DUSP4, MUC5B, SAA4, GLRB, HS3ST4, PROS1, TMEM45A, NR1I2, CSF3, AKR1C1, ACHE, CLGN, GUSBP4, GJB7, HGD, PIP5K1B, NA, SLC13A3, ZNF331, PGLYRP4, C11orf63, KIAA0232, PTP4A1, NSUN7, TSPAN6, HNF1A-AS1, RHOV, LRRC37B, PCYT2, LRWD1, ODC1, GK5, OSBPL6, ACTA1, CES4A, TCTN1, CCDC30                                                                                                                                                                                 | <a href="http://www.ncbi.nlm.nih.gov/pubmed/21187436">http://www.ncbi.nlm.nih.gov/pubmed/21187436</a> |
| <b>15</b> | HBG1, CAMKK2, CAV1, DUSP1, DUSP5, FLNC, TNFRSF17, ALPL, TRIB1, SGK1, MME, SOCS3, PTGS2, IL1RAP, IL1R2, LIFR, COL18A1, ITGB8, GPC1, SLIT1, POMZP3, KCNJ4, SELL, PABPC4, TRIM9, PDLIM4, IGKC, IGH, GYPC, CDKN2C, CCL11, CABP1, RAMP3, RRM2, RBFOX2, CXCL8, MMP9, CXCL2, CD38, FPR1, TOP2A, AKAP8L, TRIP6, BCL3, RB1, CDC45, CREBBP, EGR1, TFDP1, ADCY3, SAT1, CCL3, FOS, MXD1, NA                                                                                                           | <a href="http://www.ncbi.nlm.nih.gov/pubmed/23190644">http://www.ncbi.nlm.nih.gov/pubmed/23190644</a> |
| <b>16</b> | NCK1, FASLG, ABI1, PSTPIP1, ARNTL, CLTC, RPS6KB1, FEZ1, CD247, GNAI1, HLA-F, HLA-B, KLRD1, KLRC1, KLRC1, EIF3C, EIF3A, HTRA2, ITGAL, SMAD7, CUL4A, SF3B3, MLH1, CDC7, SNUPN, HNRNPAB, SYT11, PRF1, MAS1, IFNG, NUP210, CDK13, SLC4A4, KIAA1279, VPS4B, XCL1, C14orf1, NFE2L1, CTCF, BRD8, RAB9A, ID3, PRSS23, PSMA3, GZMA, TAF1A, ATF2, STAT4, CEBPG,                                                                                                                                     | <a href="http://www.ncbi.nlm.nih.gov/pubmed/23190644">http://www.ncbi.nlm.nih.gov/pubmed/23190644</a> |
| <b>17</b> | COPB2, S1PR4, GNB1, ARHGEF2, CAMKK2, RABAC1, KIF3B, MKNK1, FLOT2, GRAP, MINK1, MAP3K14, MAP2K4, FMNL1, PGAM1, GLS, MTOR, NEDD4L, PTPN6, CSK, STAT5B, PIK3CD, HCLS1, RPA1, PRDX1, RPA2, HADHB, PRDX4, FZD7, LIMK2, AP3D1, VAMP2, VAPB, CFL1, WIPF1, DDB1, STX12, GPSM3, S100A9, IFNGR2, DLGAP5, ARF3, TPD52L2, PHC2, MAP4K4, GPI, AIMP2, ENO1, AKAP8L, RXRA, MBD2, ACVR1, SPEN, ICAM3, TRIP12, S100A8, RBPJ, PPP4R1, TM9SF2, BAG1, USP4, MTA1, SMAD4, NUP98, MAML1, ANP32A, ARFIP2, PCMT1, | <a href="http://www.ncbi.nlm.nih.gov/pubmed/23190644">http://www.ncbi.nlm.nih.gov/pubmed/23190644</a> |

|           |                                                                                                                                                                                                                                                                                                                                                                                                                                                                                                                                                                                                                                                                                                                                                                                                                                                                                                                                                                      |                                                                                                       |
|-----------|----------------------------------------------------------------------------------------------------------------------------------------------------------------------------------------------------------------------------------------------------------------------------------------------------------------------------------------------------------------------------------------------------------------------------------------------------------------------------------------------------------------------------------------------------------------------------------------------------------------------------------------------------------------------------------------------------------------------------------------------------------------------------------------------------------------------------------------------------------------------------------------------------------------------------------------------------------------------|-------------------------------------------------------------------------------------------------------|
|           | RAC2, ALDOA, NFYC, TP53TG1, DNPEP, MAPK14                                                                                                                                                                                                                                                                                                                                                                                                                                                                                                                                                                                                                                                                                                                                                                                                                                                                                                                            |                                                                                                       |
| <b>18</b> | CYCS, CALD1, SLC25A4, PNO1, METAP2, FASLG, PKN2, AKT2, FGF2, RNF216, SSX2IP, RHEB, PIK3R1, GNAI1, TFRC, SH2B3, NCR1, HSPA5, LIPC, GUCY1A2, DLG2, SMAD7, ARF6, IFNG, SLC4A4, TIMM17A, YES1, JUND, MED1, GTF2B, ARID4A, RORA, CDKN1B, ENC1, ID2, MATK, ID3, ID1, KRR1, TNPO1, ANXA1, SKI, SRSF7, CHD1, SRSF3, MXD4, HIST1H1B                                                                                                                                                                                                                                                                                                                                                                                                                                                                                                                                                                                                                                           | <a href="http://www.ncbi.nlm.nih.gov/pubmed/23190644">http://www.ncbi.nlm.nih.gov/pubmed/23190644</a> |
| <b>19</b> | GNA12, MINK1, MAP3K14, RIPK1, GRB14, BCL10, SNTA1, HMOX1, SDC4, NEDD4L, PRG2, TGFB2, CD5, PTGS2, LIFR, TLR6, IGF2, FURIN, ITGB8, CCL7, SORT1, LCT, FZD7, PABPC4, BMP6, GYPC, CDKN2C, CXCL9, CXCR3, MCM6, Mar-02, RAMP3, DLGAP5, RBFOX2, REPS2, CXCL3, CXCL2, HAPLN1, LCN2, CTSL, GEMIN4, TRIP6, BMP2, TRIP12, PHLDA1, TAB2, HMGA1, MSC, NUP98, EGR1, ADCY3, PRDM1, DNPEP, MAX, CCL3, ZFP36L1,                                                                                                                                                                                                                                                                                                                                                                                                                                                                                                                                                                        | <a href="http://www.ncbi.nlm.nih.gov/pubmed/23190644">http://www.ncbi.nlm.nih.gov/pubmed/23190644</a> |
| <b>20</b> | CYCS, SOS1, PSTPIP1, CRELD1, TARS, SSX2IP, ACD, P2RX7, MAP2K5, SYK, BLNK, PLCG2, HLA-B, NCR1, SEBOX, ATP2B4, IL2RG, ZRSR2, ARF6, TESK1, SF3B3, FANCA, VPS4B, ITGB1BP1, ITGA4, IRF8, NFE2L1, IRF1, HDAC3, STX8, MNAT1, GTF2H4, ANXA1, ARFRP1, HIST1H1B                                                                                                                                                                                                                                                                                                                                                                                                                                                                                                                                                                                                                                                                                                                | <a href="http://www.ncbi.nlm.nih.gov/pubmed/23190644">http://www.ncbi.nlm.nih.gov/pubmed/23190644</a> |
| <b>21</b> | YWHAE, SNCA, GPRIN2, APLP2, GRK5, CNN1, GNA12, KLK6, COPB2, CYB5R3, HBG1, NRG1, RGS2, S1PR4, GNAQ, TBXA2R, TOR1A, TUBA1A, GNB1, ARHGEF2, CTNNA1, ADRBK2, GNG10, BDKRB2, SFN, NTRK2, MAPK3, CAV1, RIN2, RABAC1, DUSP1, RAB4A, SYN1, NOS1AP, PAK2, MKNK1, NCK2, WASF1, DUSP5, NTRK3, TNFRSF1B, MINK1, BST1, SOD2, SNCG, LTA, DUSP6, BUB1B, LSM1, GRB14, MAP2K4, CLIC1, FLNC, TRAF3, PCBP1, CSF2RA, ALPL, LDHA, BCL10, EIF6, TRIB1, LSM5, TNIP1, ACTN1, PDLIM1, FBP1, ADORA2A, PICALM, POR, TOM1, SNTA1, PGAM1, HMOX1, SVIL, TGFB1I1, SGK1, RAP1A, PTPN12, TNFRSF10C, SDCBP, BRAF, SDC4, FKBP1A, NEDD4L, BSG, SLC16A3, PRG2, PSEN1, PDLIM7, GAB2, ADM, MME, CSK, TLR2, PIK3CB, CSF2RB, LILRB2, FCAR, FCGR1A, CSF3R, SOCS3, STAT5B, FCER1G, WASF3, NDN, PTGS2, PECAM1, GAST, IL1RAP, MYD88, SLA, IL1R2, SSTR2, NUCB1, LILRB1, LY96, FCGR2A, GABARAP, TLR6, CD14, HCLS1, IGF2, NOV, GSN, LRP1, LRPAP1, APP, CR1, C4A, DMC1, RPA1, FURIN, GAPDH, TG, NOTCH2, ITGB8, HADHB, | <a href="http://www.ncbi.nlm.nih.gov/pubmed/23190644">http://www.ncbi.nlm.nih.gov/pubmed/23190644</a> |

|  |                                                                                                                                                                                                                                                                                                                                                                                                                                                                                                                                                                                                                                                                                                                                                                                                                                                                                                                                                                                                                                                                                                                                                                                                                                                                                                                                                                                                                                                                                                                                                                                                                                                                                                                                                                                                                                                    |  |
|--|----------------------------------------------------------------------------------------------------------------------------------------------------------------------------------------------------------------------------------------------------------------------------------------------------------------------------------------------------------------------------------------------------------------------------------------------------------------------------------------------------------------------------------------------------------------------------------------------------------------------------------------------------------------------------------------------------------------------------------------------------------------------------------------------------------------------------------------------------------------------------------------------------------------------------------------------------------------------------------------------------------------------------------------------------------------------------------------------------------------------------------------------------------------------------------------------------------------------------------------------------------------------------------------------------------------------------------------------------------------------------------------------------------------------------------------------------------------------------------------------------------------------------------------------------------------------------------------------------------------------------------------------------------------------------------------------------------------------------------------------------------------------------------------------------------------------------------------------------|--|
|  | MMP14, TIMP2, CASP4, PGK1, CST3, BGN, CCL7, C4A, GPC4, CTSD, DSG3, SERPINA3, CHM, SORT1, NUMB, ITGB5, ADAM9, FLOT1, PRDX4, F5, LCT, RAB11A, GPC1, SLIT1, ITM2B, POMZP3, F8, C3AR1, ANXA5, PSAP, ICAM1, KCNJ4, LIN7A, CHP1, KIF1B, KCNJ2, S100P, SDC2, CAPNS1, LIMK2, ACTC1, ABLIM3, AP3D1, VAPB, VASP, STXBP2, DMTN, PIP5K1C, SSH1, CDC42BPA, LASP1, XPO6, VAMP7, ZYX, SRSF9, WIPF1, WDR1, TRIM9, TESK2, HIST1H2BD, PDLIM4, SF3B4, BMP6, UBOX5, EXO1, FCGR3A, TLR1, NAPA, STX12, MPP1, CDKN2A, UBE2C, ENSA, SMARCD3, CXCL9, CCL11, MCM6, STX6, Mar-02, BID, CD101, CD80, CD86, TYR, TYRP1, PITPNA, F2RL1, ST14, IL1RN, ABI2, ACVR2B, PDHA2, TPM4, GPSM3, ADRA2A, CABP1, CHST15, RRAGD, RAMP3, LAMP2, CTSA, IRAK3, IFNGR2, CP, DLGAP5, GYPA, RHAG, ARF3, CENPB, RNASE2, APOBEC1, RBFOX2, CA4, GP1BA, CDC42EP2, REPS2, ANXA3, TPD52L2, PLP2, HP, CD163, DPEP1, CHMP1A, C2, AQP1, PHC2, AFG3L2, S100A2, TPM1, ITGB1, MAP4K4, CXCL3, CXCR2, AMFR, GPI, COL4A4, TGFBI, CD36, CD93, CXCL8, CXCR1, MMP9, TIMP1, CXCL2, AIMP2, HAPLN1, CXCL1, CCL2, VCAN, CD63, EPS8, CD9, LCN2, COL1A1, SAA1, TLN1, ENO1, FPR1, UBE2E3, IRF2, GATA2, AKAP8L, MAPK7, THRB, CRMP1, CTSL, SPRY2, BCL6, RXRA, BMP7, PLSCR1, CUX1, NCOR2, TRIP6, ARNT, SERPINB3, MBD2, ACVR1, BMP2, SPEN, TRIP12, PHLDA1, SLPI, ANXA11, S100A8, RBPJ, FHL2, PPP4R1, KLHL35, RNF11, TAB2, CDK14, TM9SF2, RB1, RNF40, CREG1, BAG1, HMGA1, FRK, POU3F1, CAT, LILRA3, RBPMS, ZDHHC3, PRUNE2, MVK, CALM1, KCNMB1, SALL2, TPGS2, TFE3, ALDH2, NUP214, MAML1, ANP32A, H3F3A, TGM2, SMAD2, FTL, HIST2H2BE, MCF2L, RHOG, EGR1, HIST1H4A, S100A11, PCMT1, ZEB2, ALDOA, SPR, TFDP1, PRDM1, HDGF, NFYC, RAB13, AGT, SAT1, GBP2, TP53TG1, B4GALT3, NFATC4, ELK3, MAPK14, MAPKAPK3, ELK1, MAPK11, MAX, CEBPB, RBM42, MAPK10, KCNK1, CCR4, TRIM29, HOMER3, FOS, CCR1, SPAG9, USF2, MXD1, CASP5, ZBED1, CDC25C |  |
|--|----------------------------------------------------------------------------------------------------------------------------------------------------------------------------------------------------------------------------------------------------------------------------------------------------------------------------------------------------------------------------------------------------------------------------------------------------------------------------------------------------------------------------------------------------------------------------------------------------------------------------------------------------------------------------------------------------------------------------------------------------------------------------------------------------------------------------------------------------------------------------------------------------------------------------------------------------------------------------------------------------------------------------------------------------------------------------------------------------------------------------------------------------------------------------------------------------------------------------------------------------------------------------------------------------------------------------------------------------------------------------------------------------------------------------------------------------------------------------------------------------------------------------------------------------------------------------------------------------------------------------------------------------------------------------------------------------------------------------------------------------------------------------------------------------------------------------------------------------|--|

|    |                                                                                                                                                                                                                                                                                                                                                                                                                                                                                                                                                                                                                                                                                                                                                                                                                                                                                                                                                                                                                                                                                                                                                                                                                                                                                                                                                                                                                                                                                                                                                                                                                                                                                                                                                                                                                                                                                                                                                                                                                                                                                                                                                                                                                                                |                                                                                                              |
|----|------------------------------------------------------------------------------------------------------------------------------------------------------------------------------------------------------------------------------------------------------------------------------------------------------------------------------------------------------------------------------------------------------------------------------------------------------------------------------------------------------------------------------------------------------------------------------------------------------------------------------------------------------------------------------------------------------------------------------------------------------------------------------------------------------------------------------------------------------------------------------------------------------------------------------------------------------------------------------------------------------------------------------------------------------------------------------------------------------------------------------------------------------------------------------------------------------------------------------------------------------------------------------------------------------------------------------------------------------------------------------------------------------------------------------------------------------------------------------------------------------------------------------------------------------------------------------------------------------------------------------------------------------------------------------------------------------------------------------------------------------------------------------------------------------------------------------------------------------------------------------------------------------------------------------------------------------------------------------------------------------------------------------------------------------------------------------------------------------------------------------------------------------------------------------------------------------------------------------------------------|--------------------------------------------------------------------------------------------------------------|
| 22 | <p>CALM1, SIAH1, PIK3CA, AKAP13, TTN, MRAS, FDX1, SLC25A4, PNO1, NCK1, METAP2, BIN1, CYFIP2, ABI1, AKAP1, EIF4A2, EIF4G2, EXOSC8, FBL, HSP90AB1, RPS6, TNFRSF10B, CDC37, HSP90AA1, HNRNPD, CAPN3, CHUK, AKT2, HARS, RPL5, RPSA, AIP, DDX39A, EXOSC9, CRELD1, OFD1, RPL6, ARNTL, SNRPN, RPL4, XRCC6, GSE1, UTRN, ACD, NCALD, RHEB, SOX4, RPS6KB1, RASGRP2, YWHAQ, MAGOH, KIF5B, TRAF4, P2RX7, PRKCZ, MAP2K5, FEZ1, DAPK3, YME1L1, CD247, PIK3R1, HNRNPU, BLNK, HLA-F, TRAC, CD72, FOLR1, IL6ST, KLRD1, INPP4A, KLRC1, SH2B3, NPM1, KLRB1, NCR1, EIF3G, EIF3H, EIF3E, EIF1AX, EIF3A, EIF3K, EIF5B, HSPA5, RECQL, XPA, RABGGTB, LRP8, PTP4A2, HMOX2, ITGAL, DLG1, EZR, ATP2B4, IL2RG, PIAS4, PRPF40A, RIF1, CLK1, SRSF6, U2AF2, ZRSR2, PPIG, SYNE1, SNRPD2, DYNC1LI2, NOL3, VAMP1, TRA2B, TWF1, SKP2, CUL4A, BRAP, CAND1, ZMYND11, BMPR1A, SF3B2, SF3B3, SF3B1, MLH1, SNRNP200, NONO, SFPQ, HSPA9, MVD, MPHOSPH10, IMP4, CD40LG, ZNF337, ATP5C1, ORC4, PSMC3, CDC7, ENO2, SNUPN, RPL17, SYNCRIP, SYT11, CSE1L, KPNA6, DPP4, STX16, GZMB, PRF1, SRSF5, SRRM1, IL12RB2, PI4KA, FBLN5, MAS1, PDHB, KPNA5, RPS19, ITPR3, ACIN1, AKR1C3, SRSF10, TRA2A, RRM1, AK1, CD48, IFNG, PARP2, NUP210, ABCE1, CELF2, CDK13, SLC4A4, OSGEP, 39326, TIMM17A, TIMM44, KIF22, REPS1, EMG1, SMARCC2, SMARCE1, TPD52, CCT4, RPL14, RPL7, TNNT2, ITGB1BP1, YES1, IGFBP3, EEF1B2, KARS, ITGA4, RPL10, XCL1, DFFB, NACA, TBP, C14orf1, ZNF24, ZBTB16, IRF8, COPS2, LAMTOR5, JUND, HMGB1, MED1, GTF2B, DHX9, ILF3, CTCF, TAF5, DPM1, POLR3F, PSMC2, STX8, SEPHS1, TRRAP, NDUFV2, KLF6, ARID4A, BRD8, HNRNPH3, CBFA2T2, RAB9A, EEF1D, DLST, DLG5, GATA3, CIR1, ILF2, SRRT, PMAIP1, RORA, ATM, TMPO, REL, PURA, CDKN1B, CCNE1, POLA1, DDX18, RAD17, GTF2H4, ELF1, CCNT2, NKRF, ENC1, MDM4, HBP1, CCND2, THOC1, PRDM2, AKAP8, TCOF1, UBTF, ERCC5, NOP56, RBBP5, PHB, EEF1E1, EWSR1, TRIM37, ID2, TCF4, MATK, ID3, ID1, PRSS23, RPS15A, ZMIZ2, KRR1, DDX5, PSMA3, GZMA, SET, NUP88, TNPO1, HSPD1, MAP3K12, RAN, ARF1, ANXA1, AES, PTMA, CAMK2G, MCF2, NXF1, MED6, SS18L1, E2F5, SRSF7, HIRIP3, TLE2, PPP2R1B, SMARCA5, TAF1A, RAE1, RPS7, HMGN1, ATF2, HNRNPK, MAPKAPK5, RAD52, UBE2I, CHD1, SRSF3, MKNK2, NOLC1, RPS6KA5, AIMP1, HOMER1, MXD4, STAT4, HSF2, CEBPG, MATR3</p> | <p><a href="http://www.ncbi.nlm.nih.gov/pubmed/23190644">http://www.ncbi.nlm.nih.gov/pubmed/23190644</a></p> |
|----|------------------------------------------------------------------------------------------------------------------------------------------------------------------------------------------------------------------------------------------------------------------------------------------------------------------------------------------------------------------------------------------------------------------------------------------------------------------------------------------------------------------------------------------------------------------------------------------------------------------------------------------------------------------------------------------------------------------------------------------------------------------------------------------------------------------------------------------------------------------------------------------------------------------------------------------------------------------------------------------------------------------------------------------------------------------------------------------------------------------------------------------------------------------------------------------------------------------------------------------------------------------------------------------------------------------------------------------------------------------------------------------------------------------------------------------------------------------------------------------------------------------------------------------------------------------------------------------------------------------------------------------------------------------------------------------------------------------------------------------------------------------------------------------------------------------------------------------------------------------------------------------------------------------------------------------------------------------------------------------------------------------------------------------------------------------------------------------------------------------------------------------------------------------------------------------------------------------------------------------------|--------------------------------------------------------------------------------------------------------------|

|    |                                                                                                                                                                                                                                                                                                                                                                                                                                                                                                                                                                                                                                                                                                                                                                                                                                                                                                                                                                                                                                                                                                                                                                                                                                                                                                                                                                                                                                                                                                                                                                                                                                                                                                                                                                                                                                                                                                                                                                                                                                                                                                                                                                                                                                                                                                                                                                      |                                                                                                              |
|----|----------------------------------------------------------------------------------------------------------------------------------------------------------------------------------------------------------------------------------------------------------------------------------------------------------------------------------------------------------------------------------------------------------------------------------------------------------------------------------------------------------------------------------------------------------------------------------------------------------------------------------------------------------------------------------------------------------------------------------------------------------------------------------------------------------------------------------------------------------------------------------------------------------------------------------------------------------------------------------------------------------------------------------------------------------------------------------------------------------------------------------------------------------------------------------------------------------------------------------------------------------------------------------------------------------------------------------------------------------------------------------------------------------------------------------------------------------------------------------------------------------------------------------------------------------------------------------------------------------------------------------------------------------------------------------------------------------------------------------------------------------------------------------------------------------------------------------------------------------------------------------------------------------------------------------------------------------------------------------------------------------------------------------------------------------------------------------------------------------------------------------------------------------------------------------------------------------------------------------------------------------------------------------------------------------------------------------------------------------------------|--------------------------------------------------------------------------------------------------------------|
| 23 | <p>YWHAE, SNCA, GPRIN2, APLP2, GRK5, CNN1, GNA12, KLK6, CYB5R3, NRGN, GNAQ, TBXA2R, TOR1A, TUBA1A, GNB1, CTNNAL1, ADRBK2, GNG10, BDKRB2, SFN, NTRK2, MAPK3, RIN2, RABAC1, DUSP1, RAB4A, SYN1, NOS1AP, PAK2, MKNK1, NCK2, WASF1, FLOT2, NTRK3, TNFRSF1B, MINK1, BST1, SOD2, SNCG, LTA, DUSP6, BUB1B, LSM1, GRB14, MAP2K4, CLIC1, TNFRSF17, TRAF3, PCBP1, CSF2RA, ALPL, LDHA, EIF6, TRIB1, LSM5, TNIP1, ACTN1, PDLIM1, FBP1, ADORA2A, PICALM, POR, FMNL1, TOM1, PGAM1, HMOX1, SVIL, TGFB1I1, SGK1, RAP1A, PTPN12, TNFRSF10C, SDCBP, BRAF, SDC4, FKBP1A, MTOR, NEDD4L, BSG, SLC16A3, PDLIM7, GAB2, ADM, MME, CD5, TLR2, PIK3CB, CSF2RB, LILRB2, FCAR, FCGR1A, CSF3R, SOCS3, FCER1G, WASF3, NDN, PTGS2, PECAM1, GAST, IL1RAP, MYD88, IL1R2, SSTR2, NUCB1, LILRB1, LY96, FCGR2A, GABARAP, TLR6, CD14, HCLS1, IGF2, NOV, GSN, LRP1, LRPAP1, APP, CR1, C4A, DMC1, FURIN, GAPDH, PRDX1, TG, NOTCH2, ITGB8, MMP14, TIMP2, CASP4, PGK1, CST3, BGN, CCL7, GPC4, CTSD, DSG3, SERPINA3, SORT1, NUMB, ITGB5, ADAM9, PRDX4, F5, RAB11A, ITM2B, F8, C3AR1, ANXA5, PSAP, ICAM1, LIN7A, CHP1, KIF1B, KCNJ2, S100P, SDC2, CAPNS1, SELL, LIMK2, ACTC1, ABLIM3, VAMP2, VASP, STXBP2, DMTN, PIP5K1C, SSH1, CDC42BPA, LASP1, XPO6, VAMP7, ZYX, SRSF9, WIPF1, WDR1, TESK2, HIST1H2BD, SF3B4, BMP6, UBOX5, EXO1, IGK, FCGR3A, IGH, TLR1, NAPA, MPP1, CDKN2A, UBE2C, ENSA, SMARCD3, CXCL9, MCM6, STX6, Mar-02, BID, CD101, CD80, CD86, TYRP1, PITPNA, IL1RN, ABI2, ACVR2B, PDHA2, TPM4, GPSM3, ADRA2A, RRAGD, RAMP3, S100A9, LAMP2, CTSA, IRAK3, RRM2, IFNGR2, CP, DLGAP5, GYPA, RHAG, ARF3, CENPB, RNASE2, APOBEC1, CA4, GP1BA, CDC42EP2, REPS2, ANXA3, TPD52L2, PLP2, HP, CD163, DPEP1, CHMP1A, C2, AQP1, PHC2, AFG3L2, S100A2, TPM1, ITGB1, CXCR2, AMFR, GPI, TGFB1, CD36, CD93, CXCL8, CXCR1, MMP9, TIMP1, CXCL2, CXCL1, VCAN, CD63, EPS8, CD9, LCN2, COL1A1, CD38, SAA1, TLN1, ENO1, FPR1, UBE2E3, TOP2A, IRF2, GATA2, AKAP8L, MAPK7, THRB, CRMP1, CTSL, SPRY2, BCL6, RXRA, BMP7, PLSCR1, CUX1, NCOR2, ARNT, SERPINB3, MBD2, ACVR1, PHLDA1, BCL3, SLPI, ANXA11, S100A8, FHL2, PPP4R1, KLHL35, RNF11, TM9SF2, RNF40, CREG1, HMGA1, FRK, CDC45, MTA1, POU3F1, CAT, MSC, LILRA3, RBPMS, ZDHHC3, PRUNE2, MVK, CALM1, KCNMB1, SALL2, TPGS2, CREBBP, SMAD4, TFE3, ALDH2, NUP214, MAML1, ANP32A, H3F3A, TGM2, SMAD2, FTL, HIST2H2BE, MCF2L, RHOG, EGR1, HIST1H4A, S100A11, ZEB2, ALDOA, SPR,</p> | <p><a href="http://www.ncbi.nlm.nih.gov/pubmed/23190644">http://www.ncbi.nlm.nih.gov/pubmed/23190644</a></p> |
|----|----------------------------------------------------------------------------------------------------------------------------------------------------------------------------------------------------------------------------------------------------------------------------------------------------------------------------------------------------------------------------------------------------------------------------------------------------------------------------------------------------------------------------------------------------------------------------------------------------------------------------------------------------------------------------------------------------------------------------------------------------------------------------------------------------------------------------------------------------------------------------------------------------------------------------------------------------------------------------------------------------------------------------------------------------------------------------------------------------------------------------------------------------------------------------------------------------------------------------------------------------------------------------------------------------------------------------------------------------------------------------------------------------------------------------------------------------------------------------------------------------------------------------------------------------------------------------------------------------------------------------------------------------------------------------------------------------------------------------------------------------------------------------------------------------------------------------------------------------------------------------------------------------------------------------------------------------------------------------------------------------------------------------------------------------------------------------------------------------------------------------------------------------------------------------------------------------------------------------------------------------------------------------------------------------------------------------------------------------------------------|--------------------------------------------------------------------------------------------------------------|

|           |                                                                                                                                                                                                                                                                                                                                                                                                                                                                                                                                                                                                                                                                                                                                                                                                                                                                                                                                                                                                                                                                                                                                                                                                                                                                                                                                                                                                                                                                                                                                                                                                                                                                                                                                                                                                                                                                                                                                                 |                                                                                                       |
|-----------|-------------------------------------------------------------------------------------------------------------------------------------------------------------------------------------------------------------------------------------------------------------------------------------------------------------------------------------------------------------------------------------------------------------------------------------------------------------------------------------------------------------------------------------------------------------------------------------------------------------------------------------------------------------------------------------------------------------------------------------------------------------------------------------------------------------------------------------------------------------------------------------------------------------------------------------------------------------------------------------------------------------------------------------------------------------------------------------------------------------------------------------------------------------------------------------------------------------------------------------------------------------------------------------------------------------------------------------------------------------------------------------------------------------------------------------------------------------------------------------------------------------------------------------------------------------------------------------------------------------------------------------------------------------------------------------------------------------------------------------------------------------------------------------------------------------------------------------------------------------------------------------------------------------------------------------------------|-------------------------------------------------------------------------------------------------------|
|           | TFDP1, HDGF, NFYC, RAB13, AGT, SAT1, GBP2, NFATC4, ELK3, MAPK14, MAPKAPK3, ELK1, MAPK11, CEBPB, RBM42, MAPK10, KCNK1, ZFP36L1, CCR4, TRIM29, HOMER3, FOS, CCR1, SPAG9, USF2, MXD1, CASP5, ZBED1,                                                                                                                                                                                                                                                                                                                                                                                                                                                                                                                                                                                                                                                                                                                                                                                                                                                                                                                                                                                                                                                                                                                                                                                                                                                                                                                                                                                                                                                                                                                                                                                                                                                                                                                                                |                                                                                                       |
| <b>24</b> | CALM1, PIK3CA, PRKCE, AKAP13, TTN, MRAS, CALD1, FDX1, NCK1, SOS1, METAP2, BIN1, CYFIP2, PKN2, AKAP1, EIF4A2, EXOSC8, FBL, HSP90AB1, RPS6, TNFRSF10B, CDC37, HSP90AA1, CAPN3, CHUK, AKT2, HARS, RPL5, RPSA, MAP2K7, AIP, FGF2, DDX39A, EXOSC9, OFD1, RPL6, TARS, SNRPN, RNF216, RPL4, CLTC, XRCC6, UTRN, ACD, NCALD, SOX4, RPS6KB1, RASGRP2, MAGOH, KIF5B, TRAF4, P2RX7, PRKCZ, DAPK3, YME1L1, CD247, HNRNPU, BLNK, HLA-F, TRAC, CD72, FOLR1, PLCG2, IL6ST, KLRD1, INPP4A, TFRC, KLRC1, SH2B3, NPM1, KLRB1, EIF3G, EIF3H, EIF3J, EIF3E, EIF1AX, EIF3K, EIF5B, RECQL, HTRA2, RABGGTB, LIPC, LRP8, PSEN2, HMOX2, DLG1, EZR, MYO6, PIAS4, PRPF40A, RIF1, CLK1, SRSF6, U2AF2, ZRSR2, PPIG, SYNE1, SNRPD2, DYNC1LI2, NOL3, VAMP1, TESK1, SKP2, BRAP, CAND1, ZMYND11, BMPR1A, SF3B2, SF3B1, SNRNP200, NONO, SFPQ, HSPA9, MVD, MPHOSPH10, IMP4, CD40LG, ZNF337, ORC4, PSMC3, ENO2, SNUPN, RPL17, SYNCRIP, HNRNPAB, CSE1L, KPNA6, DPP4, PSMA1, STX16, GZMB, SRSF5, PI4KA, FBLN5, PDHB, KPNA5, RPS19, ITPR3, ACIN1, AKR1C3, SRSF10, TRA2A, AK1, CD48, PARP2, NUP210, ABCE1, CELF2, OSGEP, 39326, TIMM44, KIF22, REPS1, EMG1, SMARCC2, TPD52, KIAA1279, CCT4, RPL14, RPL7, TNNT2, IGFBP3, EEF1B2, KARS, RPL10, XCL1, DFFB, TBP, ZNF24, ZBTB16, IRF8, COPS2, LAMTOR5, HMGB1, IRF1, HDAC3, MED1, GTF2B, DHX9, ILF3, TAF5, DPM1, POLR3F, PSMC2, SEPHS1, TRRAP, RPS27A, NDUFV2, KLF6, ARID4A, BRD8, HNRNPH3, CBFA2T2, EEF1D, DLST, DLG5, GATA3, CIR1, ILF2, SRRT, PMAIP1, ATM, TMPO, REL, PURA, MNAT1, POLA1, DDX18, RAD17, GTF2H4, ELF1, CCNT2, NKRF, MDM4, HBP1, CCND2, THOC1, PRDM2, AKAP8, TCOF1, UBTF, ERCC5, NOP56, RBBP5, PHB, EEF1E1, EWSR1, TRIM37, ID2, TCF4, MATK, TCF12, RPS15A, ZMIZ2, KRR1, DDX5, PSMA3, SET, NUP88, TNPO1, HSPD1, MAP3K12, RAN, ARF1, ARFRP1, AES, PTMA, CAMK2G, NXF1, MED6, SS18L1, E2F5, SRSF7, HIRIP3, DDX19A, PPP2R1B, SMARCA5, TAF1A, RAE1, RPS7, HMGN1, HNRNPK, RAD52, SRSF3, MKNK2, NOLC1, RPS6KA5, AIMP1, HOMER1, MXD4, | <a href="http://www.ncbi.nlm.nih.gov/pubmed/23190644">http://www.ncbi.nlm.nih.gov/pubmed/23190644</a> |



|           |                                                                                                                                                                                                                                                                                                                                                                                                                                                                                                                                                                                                                                          |                                                                                                       |
|-----------|------------------------------------------------------------------------------------------------------------------------------------------------------------------------------------------------------------------------------------------------------------------------------------------------------------------------------------------------------------------------------------------------------------------------------------------------------------------------------------------------------------------------------------------------------------------------------------------------------------------------------------------|-------------------------------------------------------------------------------------------------------|
|           | STAT4, HSF2, CEBPG, MATR3,                                                                                                                                                                                                                                                                                                                                                                                                                                                                                                                                                                                                               |                                                                                                       |
| <b>25</b> | RGS2, S1PR4, RABAC1, DUSP1, KIF3B, FLOT2, GRAP, SOD2, DUSP6, RIPK1, TNFRSF17, TRAF3, ALPL, TRIB1, ADORA2A, GLS, SVIL, SGK1, TNFRSF10C, SLC16A3, PRG2, PSEN1, TGFB2, MME, PTPN6, FCAR, CSF3R, SOCS3, STAT5B, PTGS2, PIK3CD, SLA, IL1R2, TLR6, CD14, HCLS1, NOV, RPA2, COL18A1, CHM, FLOT1, C3AR1, S100P, SELL, LIMK2, CFL1, XPO6, DDB1, IGK, IGH, TLR1, CXCR3, STX6, CD80, TYR, F2RL1, ST14, CHST15, IFNGR2, PLP2, PHC2, CXCL3, CXCR2, COL4A4, CXCL8, CXCR1, MMP9, CXCL2, CXCL1, CCL2, FPR1, IRF2, BCL6, GEMIN4, ARNT, ICAM3, SLPI, S100A8, CDK14, USP4, NUP214, ARFIP2, EGR1, S100A11, RAC2, PRDM1, B4GALT3, CCL3, CCR4, FOS, CCR1, MXD1 | <a href="http://www.ncbi.nlm.nih.gov/pubmed/23190644">http://www.ncbi.nlm.nih.gov/pubmed/23190644</a> |

|    |                                                                                                                                                                                                                                                                                                                                                                                                                                                                                                                                                                                                                                                                                                                                                                                                                                                                                                                                                                                                                                                                                                                                                                                                                                                                                                                                                                                                                                                                                                                                                 |                                                                                                       |
|----|-------------------------------------------------------------------------------------------------------------------------------------------------------------------------------------------------------------------------------------------------------------------------------------------------------------------------------------------------------------------------------------------------------------------------------------------------------------------------------------------------------------------------------------------------------------------------------------------------------------------------------------------------------------------------------------------------------------------------------------------------------------------------------------------------------------------------------------------------------------------------------------------------------------------------------------------------------------------------------------------------------------------------------------------------------------------------------------------------------------------------------------------------------------------------------------------------------------------------------------------------------------------------------------------------------------------------------------------------------------------------------------------------------------------------------------------------------------------------------------------------------------------------------------------------|-------------------------------------------------------------------------------------------------------|
| 26 | SIAH1, PRKCE, EIF4G2, HNRNPD, MAP2K7, OFD1, RPL4, SSX2IP, XRCC6, GSE1, YWHAQ, P2RX7, YME1L1, SYK, KLRD1, KLRB1, EIF3H, EIF3J, EIF3E, EIF3C, EIF3K, SEBOX, XPA, LRP8, PSEN2, PTP4A2, GUCY1A2, DLG2, MYO6, SYNE1, DYNC1LI2, NOL3, TRA2B, TWF1, CUL4A, ATP5C1, RPL17, FANCA, PSMA1, GZMB, SRRM1, IL12RB2, ITPR3, AKR1C3, SRSF10, TRA2A, RRM1, IFNG, 39326, REPS1, SMARCE1, TNNT2, KARS, NACA, ZBTB16, HMGB1, POLR3F, PSMC2, STX8, RPS27A, HNRNPH3, CBFA2T2, RAB9A, CIR1, CCNE1, MDM4, HBP1, TCF12, RPS15A, KRR1, TNPO1, SKI, MCF2, TLE2, DDX19A, RPS7, MAPKAPK5, UBE2I, HOMER1                                                                                                                                                                                                                                                                                                                                                                                                                                                                                                                                                                                                                                                                                                                                                                                                                                                                                                                                                                     | <a href="http://www.ncbi.nlm.nih.gov/pubmed/23190644">http://www.ncbi.nlm.nih.gov/pubmed/23190644</a> |
| 27 | BCL3, SOCS3, PIM1, SBNO2, LDHA, CMAHP, PDCD1, IGFL1, LOC731186, MUC1, GPRIN3                                                                                                                                                                                                                                                                                                                                                                                                                                                                                                                                                                                                                                                                                                                                                                                                                                                                                                                                                                                                                                                                                                                                                                                                                                                                                                                                                                                                                                                                    | <a href="http://www.ncbi.nlm.nih.gov/pubmed/22532634">http://www.ncbi.nlm.nih.gov/pubmed/22532634</a> |
| 28 | CFH, CFLAR, PLXND1, CYB561, TYMP, ANK1, RORA, TRIB2, TXK, PLD1, MCAM, IL12RB2, P2RX5, MAP3K4, ABCB1, TBC1D2, IL12RB1, TNFSF13B, CTSB, CA2, TRPS1, KCNN4, IMPDH1, SPOCK2, HLF, IL26, KLRB1, IL17A, IL17F, CCL20, ITGA4, IL1R1, EPAS1, ELOVL4, CCR2, APOL3, PALLD, ARNTL, SCRNI, FURIN, ITGAX, TOB1, RORC, SLC4A10, ADAM12, DST, GBP5, AUTS2, ACE, ZFYVE28, CCR5, IL23R, B3GALT2, ANTXR2, PTPN13, ANXA5, HPGD, CTSB, AQP3, KIF5C, LIMS1, CXCR6, DAB1, PTPRM, LONRF3, GREM2, FES, ZNRF1, GIMAP5, DPP4, LINGO4, TNFRSF25, LINC00299, LGALS3, ALPK1, PFKFB3, RNASET2, PDCD4, MAGED4, MAST4, ITGA6, CITED2, OSBP2, CERK, VDR, AK3, CDH4, S100A6, LRP12, MAPK10, RUNX1, MXD1, EMP1, SMOX, DTX1, AGPAT4, MYC, PCBP4, SPG20, PDE4D, NR1D2, NPDC1, CEBPD, ATP6V0A1, RCL1, LATS2, RAB11FIP5, RARG, GRAMD1B, SLC35G1, IL6R, GABBR1, ENTPD6, IL7R, SSBP3, GNA15, YBX3, TTC39C, FHL1, MLLT4, FLOT1, CCDC65, PERP, ADAM15, RPS6KA3, TGFB2, STOM, NEO1, IL4I1, IL18RAP, TDRKH, AGO4, PHLDA1, PPP4R1, LIMS3, GAB3, CLIC3, ADTRP, EVA1C, SEC31B, ME1, FLT3LG, NMRK1, MVP, EPG5, MAN2A2, C3AR1, ZNF652, PLEKHF1, DSE, CD274, CASK, FKBP11, OBFC1, ELOVL6, PPK, PPP2R2B, GALNT10, CYP27B1, PPT1, MAPK3, METRN1, SETD7, THBS1, NR1D1, C14orf182, LTBP4, SLAMF1, SRD5A3, ADCY3, ACKR3, ABCD1, CLOCK, MCF2L2, JUN, RNF144B, SFXN3, VSIG1, AMPD2, IFI44, ZDHHC9, KCNA2, LMO4, ECE1, FEZ1, TMEM184B, NCF4, TRADD, UNC93B1, MB21D2, PPAP2C, LST1, MYO5A, C4orf26, CYFIP1, PLAUR, MAST1, METTL21B, NUA2, FAM159A, CRYBG3, SH2B2, MDM2, CSNK1E, ADA, SLC38A5, CFHR1, MAML3, | <a href="http://www.ncbi.nlm.nih.gov/pubmed/22715389">http://www.ncbi.nlm.nih.gov/pubmed/22715389</a> |

|  |                                                                                                                                                                                                                                                                                                                                                                                                                 |  |
|--|-----------------------------------------------------------------------------------------------------------------------------------------------------------------------------------------------------------------------------------------------------------------------------------------------------------------------------------------------------------------------------------------------------------------|--|
|  | SOX5, SMAD3, RIPK2, NPHP4, GLA, MAP3K7CL, PAG1, CFP, LAPTM4B, PITPNC1, MPI, SFXN2, ZFP36L1, CDC42EP3, TSHZ3, ROPN1L, SIAE, NPC1, LPCAT4, MINA, NT5E, ARL3, TANC2, USP30, ITGA3, THOC3, B3GALNT2, MAP3K3, GIMAP1, BOP1, PGS1, C10orf2, DHX32, TNFRSF10B, TCEAL3, IRF1, KCNA3, PLSCR3, PLXNC1, ADPRH, PRKCD, ANKRD28, DHX58, NDRG1, EXT1, PHF11, CHN1, RANBP9, WDR59, RNF19A, CORO2A, CACNB3, OSTF1, MKNK2, ENPP2 |  |
|--|-----------------------------------------------------------------------------------------------------------------------------------------------------------------------------------------------------------------------------------------------------------------------------------------------------------------------------------------------------------------------------------------------------------------|--|

|    |                                                                                                                                                                                                                                                                                                                                                                                                                                                                                                                                                                                                                                                                                                                                                                                                                                                                                                                                                                                                                                                                                                                                                                                                                                                                                                                                                                                                                                                                                                                                                                                                                                                                                                                                          |                                                                                                              |
|----|------------------------------------------------------------------------------------------------------------------------------------------------------------------------------------------------------------------------------------------------------------------------------------------------------------------------------------------------------------------------------------------------------------------------------------------------------------------------------------------------------------------------------------------------------------------------------------------------------------------------------------------------------------------------------------------------------------------------------------------------------------------------------------------------------------------------------------------------------------------------------------------------------------------------------------------------------------------------------------------------------------------------------------------------------------------------------------------------------------------------------------------------------------------------------------------------------------------------------------------------------------------------------------------------------------------------------------------------------------------------------------------------------------------------------------------------------------------------------------------------------------------------------------------------------------------------------------------------------------------------------------------------------------------------------------------------------------------------------------------|--------------------------------------------------------------------------------------------------------------|
| 29 | <p>MCM8, CDKN2AIPNL, MMP25, CD74, CFLAR, FOXK1, CSNK1G2, ZNF250, DMC1, MAGT1, ZNF14, HLA-E, FAM115A, SSTR2, SPTLC1, NA, METTL21A, NLRP8, NCF1C, NA, ZFYVE20, ZNF321P, YRDC, ITGA2, NA, IL10, OCIAD1, STAT1, C5orf28, ALPP, RNF24, IL17RD, GABPB2, DDX51, C8orf37, KCNH6, ITPK1-AS1, GPR1, CASP4, NA, EID2B, ZNF682, TNFSF13B, HSD17B7, N4BP2, CDAN1, FKBP14, TUBA3FP, BLZF1, HYPK, SPI1, XPNPEP3, DTWD2, ADAR, SDHAP1, AK1, PDE4C, GJC1, FKTN, GGA1, RBCK1, ZNF549, SLC16A12, MCMDC2, DHFR, MBOAT7, INIP, MSRB3, SHISA5, MSH3, SLC35E1, MIF, ZNF430, MTMR12, CFAP74, NA, AUNIP, EIF2AK2, XRCC2, FAM73A, ZNF814, PNPT1, VCAN, VIM, ZNF69, RASGRP2, NUBPL, PARP14, SLC44A2, SORL1, AFF3, ZNF530, NA, ORC6, FBXO40, USP49, IFI35, AKNA, ZMAT3, NPIPB3, PPA2, FCGR1A, MLKL, ARL16, SLC44A4, GPSM3, LILRB1, PSME2, ZYX, TAPBP, PLIN3, NA, ARHGDIA, SEMA3E, CORO1A, CEP19, IRF9, ZNF652, SERPING1, MAP3K11, GNAI2, EXO5, SERPINA1, ACAP1, SLC25A44, CYB5RL, VHL, MVP, IL4R, PSMB8, ZNF394, TDP1, RHBDF2, LRRC47, ERAP2, IRF7, HLA-G, PARP10, ZNF683, TNFSF14, MBD4, AHR, CREB1, PLEKHO2, CATSPER2, ZNFX1, ZNF786, SNRNP70, RPL7L1, AKT1, LPAR2, SLC16A3, INTS7, CMTM7, ATHL1, PDCD7, SYAP1, CCR6, CTDSP1, TIAF1, MYO1F, C17orf62, LAP3, STAT5A, ADRM1, IL18, BCYRN1, KIAA0101, ARF3, FAM177A1, CSF2RA, CTSW, CAPZB, C15orf39, PDPR, PPP2R1A, TCIRG1, MAST3, SP110, AKR1D1, ISG15, IL17RA, UNC93B1, CFD, HNRNPU, JUP, NOP56, DAPP1, RN7SL1, ANKRD22, PTPN6, CD27, MBD6, TRPC4AP, CD97, MKNK2, MYO1G, TRANK1, ATG16L2, NDE1, LAPTM5, CPT2, AHCYL1, CD37, SLC25A28, PLCB2, NCOR2, MICAL1, ZNF483, NBEAL2, PIGR, GAPDH, ITIH5, PGS1, ACADVL, IRF2BPL, RBM23, TMEM17, RNF167, VPS9D1, MED22, SBNO2, PRKD2, LAT2, LILRB3, SDF2L1, CNDP2, GRIPAP1</p> | <p><a href="http://www.ncbi.nlm.nih.gov/pubmed/21357945">http://www.ncbi.nlm.nih.gov/pubmed/21357945</a></p> |
|----|------------------------------------------------------------------------------------------------------------------------------------------------------------------------------------------------------------------------------------------------------------------------------------------------------------------------------------------------------------------------------------------------------------------------------------------------------------------------------------------------------------------------------------------------------------------------------------------------------------------------------------------------------------------------------------------------------------------------------------------------------------------------------------------------------------------------------------------------------------------------------------------------------------------------------------------------------------------------------------------------------------------------------------------------------------------------------------------------------------------------------------------------------------------------------------------------------------------------------------------------------------------------------------------------------------------------------------------------------------------------------------------------------------------------------------------------------------------------------------------------------------------------------------------------------------------------------------------------------------------------------------------------------------------------------------------------------------------------------------------|--------------------------------------------------------------------------------------------------------------|

|    |                                                                                                                                                                                                                                                                                                                                                                                                                                                                                                                                                                                                                                                                                                                                                                                                                                                                                                                                                                                                                                                                                                                                                                                                                                                                                                                                                                                                                                                                                                                                                                                                                                                                                         |                                                                                                       |
|----|-----------------------------------------------------------------------------------------------------------------------------------------------------------------------------------------------------------------------------------------------------------------------------------------------------------------------------------------------------------------------------------------------------------------------------------------------------------------------------------------------------------------------------------------------------------------------------------------------------------------------------------------------------------------------------------------------------------------------------------------------------------------------------------------------------------------------------------------------------------------------------------------------------------------------------------------------------------------------------------------------------------------------------------------------------------------------------------------------------------------------------------------------------------------------------------------------------------------------------------------------------------------------------------------------------------------------------------------------------------------------------------------------------------------------------------------------------------------------------------------------------------------------------------------------------------------------------------------------------------------------------------------------------------------------------------------|-------------------------------------------------------------------------------------------------------|
| 30 | <p>GPR183, CD300LF, UBE2A, CRLF3, 37500, PRDX5, RSBN1, TPM1, C5orf15, DNAJB6, SMOX, ADSS, ZMAT2, HMBS, INSIG1, TRIM33, TMEM183B, H2AFY, CEPT1, DNAJA4, TOR1AIP1, ANP32B, SCAMP1, GPX4, RGS10, KIAA0430, KIAA1551, LBR, XPO7, CCNI, TM6SF1, HNRNPK, RPL6, SLC44A1, TLE4, SLC40A1, VEZF1, SRP14, MS4A7, PNRC2, EFR3A, ARRDC3, HPS1, CDKN1B, TMBIM4, SNX3, TMEM87A, OGT, BCL2L1, ATP6V0C, MBP, XK, CD47, ANXA5, TFDP1, PRDX6, NPRL3, SIAH1, CHMP3, FGL2, IGF2BP2, OPTN, BAZ2B, CD302, ARPC3, GLO1, SNRK, PRKRIR, UBE2D3, PGRMC1, ATP6V1A, PAPD4, PRNP, FAM60A, TMED5, EVI2B, PELI1, KLHDC8B, PRDX3, PTEN, DAZAP2, OR2W3, SUZ12, VMP1, EEF1A1, BPGM, LST1, GUCD1, JTB, UBXN4, NDUFB5, TNS1, F2RL1, SRP9, MAP3K7CL, YPEL5, OLR1, ACP1, FBXO33, FTL, YOD1, ETS1, ATP5L, Mar-08, MPP1, CMTM6, AP1S2, BTF3, PRDX2, C2orf88, SH3BGRL, DPM2, CAB39, GYPB, RIOK3, RAB10, GOLGA7, RAB31, ITGB1, CLK1, EEF1A1P12, EIF3E, YBX1, ACTR2, SLC6A10P, CCNDBP1, CXCR4, ATP5E, DCAF6, PTBP3, HAGH, TMSB4X, POLR1D, C9orf78, CD46, CHPT1, YWHAH, ATP5EP2, LYZ, PTGS2, YBX3, TMEM71, PIP4K2A, OXR1, GNG11, ARL6IP1, IFIT1B, CAPZA2, GRINA, RGCC, TMEM123, MMD, NPTN, TMOD1, SDPR, SGK1, IFNGR1, HIST1H2AC, RPL30, RNF11, SERF2, CXCL8, TRAM1, GYPC, PCNP, PRKAR1A, RAB11A, PAIP2, PSMF1, SESN3, ZFAND5, FBXO7, SRGN, CHURC1, FAM104A, UBXN6, GABARAPL2, Mar-07, TPGS2, PPM1A, HBA2, MS4A3, OAZ1, HBB, UBB, ASCC2, ADIPOR1, SELENBP1, NINJ2, VNN2, CA2, ODC1, TSPAN5, SLC25A39, E2F2, TPT1, TRIM58, DCAF12, NCOA4, MBNL3, CEACAM8, RAB2B, GSPT1, OLFM4, RAP1GAP, SNCA, EPB42, MKRN1, RGS18, GYPE, ELANE, SLC4A1, GLRX5, PITHD1, VWCE, BNIP3L, AHSP, STRADB, HBD, ALAS2, YBX3P1, CAMP, FAM46C, DEFA4, DEFA1B</p> | <a href="http://www.ncbi.nlm.nih.gov/pubmed/21357945">http://www.ncbi.nlm.nih.gov/pubmed/21357945</a> |
| 31 | <p>BCL11A, CCR7, KIAA0125, RBP5, CD22, FAIM3, DHRS9, ATP2C2, FCRLA, KBTBD12, CES3, C8orf34, GPR110, CR2, C5orf20, LOC130576, ZFYVE19, IGDCC4, DERL3, OSBPL3, MZB1, UNQ6228, SIGLEC6, CXCL13, MAN1C1, UGT8, CD79A, DMRT2, TMEM200A, GPR110, LRRRC75A, TMEM9, SLC4A8, CALB2, RALGPS2, FAM129C, FOLH1, KLHL6, PDGFRL, TMEM182, ANKS1B, PRDM15, PRRX1, SLC45A3, IRF4, PNMAL1, CD79B, AMPD1</p>                                                                                                                                                                                                                                                                                                                                                                                                                                                                                                                                                                                                                                                                                                                                                                                                                                                                                                                                                                                                                                                                                                                                                                                                                                                                                              | <a href="http://www.ncbi.nlm.nih.gov/pubmed/23925644">http://www.ncbi.nlm.nih.gov/pubmed/23925644</a> |

|           |                                                                                                                                                                                                                                                                                                                                                                                                                                                                                                                                                                              |                                                                                                       |
|-----------|------------------------------------------------------------------------------------------------------------------------------------------------------------------------------------------------------------------------------------------------------------------------------------------------------------------------------------------------------------------------------------------------------------------------------------------------------------------------------------------------------------------------------------------------------------------------------|-------------------------------------------------------------------------------------------------------|
| <b>32</b> | PAPSS2, WFDC1, NOSTRIN, NDEL1, NEDD9, STARD13, ASRGL1, EDNRB, KLF13, STOM, GPR4, MT1JP, SYN2, TMEM2, STX12, COL4A2, PAG1, RTN4, ABTB2, FCN3, ACVRL1, NES, PLXNA2, PODXL, PECAM1, RGCC, S100A8, TACC1, ENG, TPST2, KRT7, SYCP2L, MYH9, CYP4Z1, PHLDB1, WNT2B, BTNL3, SMAD6, RCOR1, LUZP1, PRKCE, ARHGEF10, HPCAL1, QKI, HERC3, COL4A1, GABARAPL1, CTTNBP2NL, KL, RIC1, CELF2, FOXF1, TMBIM1, BRINP1, CSPG4, SH3BP5, STXBP6, ATOH8, TAL1, CRMP1, RAI2, S1PR1, LPHN2, MAP2, CMTM8, SDE2, VIPR1, PKN1, ECHDC3, ADRB1, GREB1L, GPR133, ZNF358, PTPN12, LRRC8A, MAOA, TGFB2, EPAS1 | <a href="http://www.ncbi.nlm.nih.gov/pubmed/23925644">http://www.ncbi.nlm.nih.gov/pubmed/23925644</a> |
| <b>33</b> | FKBP5, PDK4, RHOTB3, ART3, PPM1K, HIF3A, KLF9, SLC39A8, PDE4DIP, JADE1, KLF15, KCNAB1, PRPH, TMX4                                                                                                                                                                                                                                                                                                                                                                                                                                                                            | <a href="http://www.ncbi.nlm.nih.gov/pubmed/23925644">http://www.ncbi.nlm.nih.gov/pubmed/23925644</a> |
| <b>34</b> | TMPRSS11D, SERPINB13, SPINK5, KRT4, TMPRSS11A, CSTA, GABRP, TYMS, GPR87, TMPRSS4, ATP10B, CH25H, SRPX2, IGKC, BNIPL, RAB38, CAPNS2, FANCD2, ABCC1, TENM2, BNC1, KLK10, PTAFR, CRABP2, TENM4, TRIM16, EYA2, GNA15, SMAGP, BICD2, EXOSC7, SCO1, BID, RHNO1, ITPA, TSPAN17                                                                                                                                                                                                                                                                                                      | <a href="http://www.ncbi.nlm.nih.gov/pubmed/23925644">http://www.ncbi.nlm.nih.gov/pubmed/23925644</a> |
| <b>35</b> | PPP2R1B, SCUBE3, ADAM22, GCC2, ACTA2, KIAA0319, FAM129A, MYOCD, NTN1, SYNPO2, CCDC30                                                                                                                                                                                                                                                                                                                                                                                                                                                                                         | <a href="http://www.ncbi.nlm.nih.gov/pubmed/23491407">http://www.ncbi.nlm.nih.gov/pubmed/23491407</a> |
| <b>36</b> | IFI35, IRF7, MX1, MX2, XIAP, IFI44L, OAS2, LY6E, AGRN, IFIT1, RSAD2, ISG15, IFIT3, CCL2, TDRD7, PLSCR1, ACSL1, TNFSF10, OAS1, GBP1, SERPING1, FCGR1A, C2, TYMP, STAT1, LAMP3, LGALS3BP, IFITM3, TAP1, IFI6, APOBEC3F, APOBEC3C, APOBEC3B, APOBEC3A, APOBEC3D, APOBEC3G, G6PD                                                                                                                                                                                                                                                                                                 | <a href="http://www.ncbi.nlm.nih.gov/pubmed/12642603">http://www.ncbi.nlm.nih.gov/pubmed/12642603</a> |
| <b>37</b> | CD3D, DLEU1, COX11, HNRNPDL, DAP3, SORL1, PRNP, SLC25A6, EIF4B, PABPC4, RAB4A, CD3G                                                                                                                                                                                                                                                                                                                                                                                                                                                                                          | <a href="http://www.ncbi.nlm.nih.gov/pubmed/12642603">http://www.ncbi.nlm.nih.gov/pubmed/12642603</a> |
| <b>38</b> | CCL5, GZMA, GZMK, PDCD1, IFNG, PACSIN1, CLIC3, TIGIT, CD70, TBX21, LYAR, ST8SIA1, CFH, IRF5, CTSH, OSM, LMO4, CCR4                                                                                                                                                                                                                                                                                                                                                                                                                                                           | <a href="http://www.ncbi.nlm.nih.gov/pubmed/23870669">http://www.ncbi.nlm.nih.gov/pubmed/23870669</a> |

|           |                                                                                                                                                                                                                                                                                                                                                                                                                                                                                                                                                                                                                                                                           |                                                                                                       |
|-----------|---------------------------------------------------------------------------------------------------------------------------------------------------------------------------------------------------------------------------------------------------------------------------------------------------------------------------------------------------------------------------------------------------------------------------------------------------------------------------------------------------------------------------------------------------------------------------------------------------------------------------------------------------------------------------|-------------------------------------------------------------------------------------------------------|
| <b>39</b> | SEMA5A, LOC729041, GATA3-AS1, NEFL, GAB2, KLRB1, NRIP3, ZP1, METRNL, TPPP, CAPG, ITPRIPL1, GATA3, ZDHHC11B, TNFRSF18, CADM1, ZDHHC11, NOD2, FANK1, LOC100131176, ABCA2, SUS4, BEGAIN, HOMER3, MRC2, ZBTB16, DUSP23, SNED1, C16orf45, BAI2, PPP1R9B, GALT, SNTN, ASPH, PRMT9, LMCD1, BEST4, RORC, NOS3, SLC25A33, PPAPDC1B, ARHGAP42, SEMA5A, LOC729041, GATA3-AS1, NEFL, GAB2, KLRB1, NRIP3, ZP1, METRNL, TPPP, CAPG, ITPRIPL1, GATA3, ZDHHC11B, TNFRSF18, CADM1, ZDHHC11, NOD2, FANK1, LOC100131176, ABCA2, SUS4, BEGAIN, HOMER3, MRC2, ZBTB16, DUSP23, SNED1, C16orf45, BAI2, PPP1R9B, GALT, SNTN, ASPH, PRMT9, LMCD1, BEST4, RORC, NOS3, SLC25A33, PPAPDC1B, ARHGAP42, | <a href="http://www.ncbi.nlm.nih.gov/pubmed/23870669">http://www.ncbi.nlm.nih.gov/pubmed/23870669</a> |
| <b>40</b> | BCL2L11, FLJ46446, NECAB3, TULP4, NXPE3, E2F3, TMEM2, CD27, LOC100128031, MBD5, GBP5, SLC12A6, PELI2, KBTBD11, CCR7, NRIP1, SNN, GPA33, PRAGMIN, TXK, ACTN1, IGF1R, BTBD11, ADTRP, TMIGD2,                                                                                                                                                                                                                                                                                                                                                                                                                                                                                | <a href="http://www.ncbi.nlm.nih.gov/pubmed/23870669">http://www.ncbi.nlm.nih.gov/pubmed/23870669</a> |
| <b>41</b> | KLRB1, RORC, PLXND1, CTSB, ALOX5, PTPN13, IL4I1, SMCO4, NEFL, HLF, JAKMIP2, DSE, LIMS1, HLA-DRB1, LTK, HLA-DRB4, USP10, NR1D1                                                                                                                                                                                                                                                                                                                                                                                                                                                                                                                                             | <a href="http://www.ncbi.nlm.nih.gov/pubmed/23870669">http://www.ncbi.nlm.nih.gov/pubmed/23870669</a> |

|    |                                                                                                                                                                                                                                                                                                                                                                                                                                                                                                                                                                                                                                                                                                                                                                                                                                                                                                                                                                                                                                                                                                                                                                                                                                                                                                                                                                      |                                                                                                       |
|----|----------------------------------------------------------------------------------------------------------------------------------------------------------------------------------------------------------------------------------------------------------------------------------------------------------------------------------------------------------------------------------------------------------------------------------------------------------------------------------------------------------------------------------------------------------------------------------------------------------------------------------------------------------------------------------------------------------------------------------------------------------------------------------------------------------------------------------------------------------------------------------------------------------------------------------------------------------------------------------------------------------------------------------------------------------------------------------------------------------------------------------------------------------------------------------------------------------------------------------------------------------------------------------------------------------------------------------------------------------------------|-------------------------------------------------------------------------------------------------------|
| 42 | <p> MYO1F, MIAT, ADAM19, LINC00152, E2F2, FAM129A, RP3-527F8.2, TESC, PDCD1, ANXA2, PRDM1, FAM46C, HLA-DRB1, LOC541471, ITGB1, NPDC1, ANXA2P1, HLA-DRB4, LOC338620, NCF4, TNFRSF4, LGALS1, TIGIT, MPST, SAP30, OASL, CPNE7, CALHM2, CD70, SRXN1, PMAIP1, GPR68, C12orf75, PLA2G16, PTGER2, PTTG1, PERP, HNRNP1L, FAS, IER5, MAF, ACTN4, RPL39L, SYT11, ANXA4, CDKN2C, AHNAK, LRFN4, RP11-374F3.4, APOBEC3C, IRF5, CHST7, DNAI2, PREX1, RNF214, S100A11, ATXN1, TNFRSF1B, SMCO4, S100A4, TUBB4B, TP53INP1, CYSTM1, CCR10, ANXA5, LOC284475, NDC80, TBK1, CREM, GALM, NBEAL2, PPP1R15A, ODF3B, ZC3H12A, CLIC5, TST, CD82, PRDM8, IL10RA, DLG3, PIEZO1, AIM2, YWHAH, HN1, CAPG, CTSB, PHACTR2, CD58, ACOT9, AAED1, CD99, GGTLC1, CLDN1, ATP2B4, PDIA6, SLC35B2, PI16, NABP2, SAMS1, MYO1G, CLIC1, EZR, SLAMF1, CHST11, FAM53B, OSBP1, LMNA, RILPL2, RALGDS, ARPC1B, GLIPR1, TRIM59, CRIP1, GATA3, SRGAP2, IL32, CDKN2A, BTG3, CCDC167, RUNX2, SRGN, ANTXR2, NLRP3, ADAM8, TPM4, GLIPR2, TXN, SSBP4, NABP1, CD63, OPTN, ASNA1, MTHFD2, RGS2, SURF4, CREB3L2, CD84, IDS, ZFYVE28, FLNA, COTL1, RAB11FIP1, COMMD5, SQRDL, PDP1, PANX1, RNF135, AQP3, FAM45A, SMC4, BNIP1, HERPUD1, GLB1, CAPN1, SHKBP1, SLC9A9, HSPA1A, SCO2, GDE1, TUBB2A, RABGAP1L, EAF1, SLC25A24, PRKCD, TRIM47, CAPN2, CCR4, SLC3A1, PFKF, S1PR2, REEP5, SNAI3, PMVK, S100A10, GGTLC2, CTSA, AHR </p> | <a href="http://www.ncbi.nlm.nih.gov/pubmed/23870669">http://www.ncbi.nlm.nih.gov/pubmed/23870669</a> |
| 43 | <p> TPCN1, ZSCAN18, DBH-AS1, CDCA7L, ZNF204P, CITED4, TCTN1, NAA16, GHRLOS, MYH3, LRRC24, ACVR1C, hCG_1990547, SLC12A7, LOC100128670, MYL5, CAPN5, GPRASP1, LAMB2P1, SMIM1, PCED1B, PPP1R3E, TXK, ROBO3, NUCB2, MEIS3P1, TLE2, MPZL1, CHI3L2, IL6ST, ACSS2, MPP1, ZNF573, PPT2, CCR7, FAM117B, SNN, EPHX2, AMIGO1, PLAG1, NET1, CHKA, MAN1C1, FBP1, SATB1, MDS2, GSAP, LOC100132345, LOC100131662, NLGN2, ITGA6, TRABD2A, TSPAN3, SCARNA16, B4GALT4, ACTN1, CERS6, NUAK2, GPC2, FBXO15, FLJ41649, BCAS4, TNFRSF10D, PDE9A, GNG7, GSTM2, CCDC106, FAM153A, PRAGMIN, AK5, PTPRS, LOC650392, APBA2, SOX8, IGF1R, BACH2, EPHB4, MYO15B, RIN1, FAM153B, AEBP1, PCSK5, AIF1, FAM213A, FHIT, LOC100129534, COL18A1, TMIGD2, CELA1, HSPG2, CLEC11A, NOG, LRRN3, </p>                                                                                                                                                                                                                                                                                                                                                                                                                                                                                                                                                                                                         | <a href="http://www.ncbi.nlm.nih.gov/pubmed/23870669">http://www.ncbi.nlm.nih.gov/pubmed/23870669</a> |



|           |                                                                                                                                                                                                                                                                                                                                                                                                                                                                                                                                                                                                                                                                                                                         |                                                                                                       |
|-----------|-------------------------------------------------------------------------------------------------------------------------------------------------------------------------------------------------------------------------------------------------------------------------------------------------------------------------------------------------------------------------------------------------------------------------------------------------------------------------------------------------------------------------------------------------------------------------------------------------------------------------------------------------------------------------------------------------------------------------|-------------------------------------------------------------------------------------------------------|
| <b>44</b> | TRIB1, FANK1, HLA-DRB1, HLA-DRB4, LOC541471, DUSP4, CD70, TIGIT, IL2RA, FOXP3, PMAIP1, CKS2, IKZF2, ICA1, SMPD3, CPNE2, RORC, PTPLA, BFSP2, MGST2, RPL39L, CTLA4, TNFRSF1B, NUSAP1, VAV3, DUSP10, SLC2A8, TOX, KLRB1, SPATS2L, CTNNAL1, LOC284475, F5, IKZF4, PCTP, BASP1, LMCD1, RHOF1, SETD7, TRIM16L, SHMT2, CXCR5, RP3-527F8.2, HLA-DMB, GBP5, HLA-DOA, FLJ46446, SMC6, HLA-DMA, IRF4, LOC730631, HS3ST3B1                                                                                                                                                                                                                                                                                                          | <a href="http://www.ncbi.nlm.nih.gov/pubmed/23870669">http://www.ncbi.nlm.nih.gov/pubmed/23870669</a> |
| <b>45</b> | AP3M2, TSPAN18, ZFP36L2, GPR35, LOC100131646, DPP4, SOS2, NLRP3, ASPH, MSX2P1, WNT10B, TMEM71, IL7R, WNT7A, STAT4, NOSIP, NR3C2, NOG, PDIA5, RBMS1, RECK, ACSL6, LOC643988, APP, CD40LG, VIPR1, WNT7B, CACNA1I, THEMIS, ID2, C1orf228, SCML4, LOC100132345, SOX8, DENND5A, AXIN2, ANK3, LOC650392, SLC40A1, NELL2                                                                                                                                                                                                                                                                                                                                                                                                       | <a href="http://www.ncbi.nlm.nih.gov/pubmed/23870669">http://www.ncbi.nlm.nih.gov/pubmed/23870669</a> |
| <b>46</b> | ALOX5, ANXA4, BIVM, BPI, BRD7, CAMP, CASK, CD63, CEACAM6, CEACAM8, CFLAR, DEFA4, GCA, LCN2, LOC23117, LOC728358, LTF, MBOAT1, MMP8, MNDA, PDE4D, POLR2J2, PPP1R16B, PRKCB, RETN, RNASE3, RUNX2, S100A12, S100A8, S100A9, S100P, SLC38A2, SPATA13, SRGN, SRGN, STOM, TNIP1, TTYH2, UGCG, ZNF749                                                                                                                                                                                                                                                                                                                                                                                                                          | <a href="http://www.ncbi.nlm.nih.gov/pubmed/21917308">http://www.ncbi.nlm.nih.gov/pubmed/21917308</a> |
| <b>47</b> | AGPS, AKIRIN1, ANAPC5, ANKRD12, ANKRD17, ANXA3, ARFGEF2, ARG1, ARIH1, AZU1, BAG2, BPI, CASD1, CASP2, CASP6, CD24, CEACAM1, CEACAM6, CEACAM6, CEACAM8, CFLAR, CHI3L1, CHI3L1, CPEB4, CSNK1A1, CYCS, DOCK9, EHBP1L1, ELANE, FAM20B, FAS, FLJ10038, FLJ38717, GCA, GGA1, GNAQ, HERPUD2, HP, HP1BP3, KDM4B, KLF9, LCN2, LOC23117, LOC728358, LRRC8C, LTF, MINA, KMT2A, MPO, MS4A3, MSI2, NBP1F11, NIPSNAP1, NMT2, NUP160, OXR1, MTPAP, PGLYRP1, PLP2, PLRG1, POGK, POLR2J2, POLR2J2, PRKX, PTER, PTPLAD1, RBM6, RECQL, RNASE3, RNPC3, RPL37A, RPS10, RSL1D1, S100P, SAMHD1, 38961, SF1, SMARCC2, SNRPN, SPEN, SRP72, TAF15, TCN1, TMEM106B, TMEM63A, TMF1, TNRC6B, UBE2H, UGCG, UGCG, YTHDC2, ZFP90, ZNF131, ZNF195, ZNF749 | <a href="http://www.ncbi.nlm.nih.gov/pubmed/21917308">http://www.ncbi.nlm.nih.gov/pubmed/21917308</a> |

|           |                                                                                                                                                                                                                                                                                                                                                                                                                                                                                                                                                                                                                                                                                                                                                                                                                                                                                                                                                                                                                                                                                                                                                                                                                                |                                                                                                       |
|-----------|--------------------------------------------------------------------------------------------------------------------------------------------------------------------------------------------------------------------------------------------------------------------------------------------------------------------------------------------------------------------------------------------------------------------------------------------------------------------------------------------------------------------------------------------------------------------------------------------------------------------------------------------------------------------------------------------------------------------------------------------------------------------------------------------------------------------------------------------------------------------------------------------------------------------------------------------------------------------------------------------------------------------------------------------------------------------------------------------------------------------------------------------------------------------------------------------------------------------------------|-------------------------------------------------------------------------------------------------------|
| <b>48</b> | <p>ABCC3, ABCC8, ABLIM2, ACTL6B, ADAM19, ADAMTS7, ADO, ALPPL2, APOBEC3F, APOBEC3G, APOC3, APOE, AQP2, ARTN, ARTN, ASCL2, BIRC7, BOC, CD1C, CD74, CDKN1C, CHRNA2, CLDN9, CLEC10A, CLEC2L, CLEC7A, COL11A2, COX6A1, CSF1R, CSPG5, CST3, DKFZp761P0212, DNALI1, EIF3B, ENPP7, C2CD4B, FAM71A, FCER1G, FGD2, FGFR1, FGL2, FLJ20021, RTP5, GALNT9, GDF9, GNPTAB, GP1BB, GPR114, GPR20, GPR39, GPRC5B, HAB1, HBA1, HBA2, HBA2, hCG_2007354, HES4, HLA-DQB1, HMOX1, IFI30, IGHA1, IGHA1, IL18RAP, IRF8, NMRK2, KDM8, KCNC4, KIAA1598, KIAA1648, PLIN4, KIF26B, KLF4, KLK13, KLRB1, KRT8, LGALS1, LILRA4, LMNA, GPAT2, LOC283177, FBXL19-AS1, SSC5D, LOC284837, LOC349114, LPAR3, LRRC16B, LRRC25, LRRN4, LRTM2, LST1, LST1, LST1, LST1, LST1, MAFB, MNT, Mar-02, MPEG1, MPEG1, MS4A6A, MUC4, MUC5AC, NF1, NFIX, NPPB, NUPR1, NYX, OXCT2, PALLD, PAPLN, PARD6G, PIK3AP1, PILRA, PRDM12, PRDM8, PRKD2, PSG5, RAB40B, RAPGEF3, RASGRF1, RHOV, RIF1, RUNX1T1, SAT1, SIGLEC10, SLC22A7, SLC7A7, SMARCB1, SMTNL1, SNCA, SNCA, SNCG, SNX22, SPON2, TBC1D9, TBX1, TBXA2R, TGFBI, TLE6, TMEM132A, TMEM151B, TMEM176B, TMEM198, TNFSF13B, TPCN1, TRAJ17, TRIM29, TTBK2, TYROBP, USP2, VASH1, VENTX, WIZ, WNK2, WNT6, ZFP36L2, ZNF20, ZNF703</p> | <a href="http://www.ncbi.nlm.nih.gov/pubmed/21917308">http://www.ncbi.nlm.nih.gov/pubmed/21917308</a> |
| <b>49</b> | <p>NFKBIZ, ZC3H12A, RELB, BIRC3, CXCL1, ZC3H12C, TNFAIP3, MAP3K8, CXCL2, CASZ1, IER3, LENG1, SOD2, RRAD, NFKB2, ID2, TATDN1, CBR3, CCL3, ICAM1, PIK3R6, GADD45B, ADAM21, ZBTB25</p>                                                                                                                                                                                                                                                                                                                                                                                                                                                                                                                                                                                                                                                                                                                                                                                                                                                                                                                                                                                                                                            | <a href="http://www.ncbi.nlm.nih.gov/pubmed/24393021">http://www.ncbi.nlm.nih.gov/pubmed/24393021</a> |
| <b>50</b> | <p>MAP3K8, OPLAH, OR13C2, IER3, TMA16, KRTAP8-1, ZC3H12A, RIMBP3, OR2T10, GPIHBP1, HNRNPCL1, NFKBIZ, PTTG1, BDKRB1, CXCL1, F13A1, IL6, LTF, CXCL10, LRMP, TLR5, NFKBIA, CXCL2, GDPGP1</p>                                                                                                                                                                                                                                                                                                                                                                                                                                                                                                                                                                                                                                                                                                                                                                                                                                                                                                                                                                                                                                      | <a href="http://www.ncbi.nlm.nih.gov/pubmed/24393021">http://www.ncbi.nlm.nih.gov/pubmed/24393021</a> |

|           |                                                                                                                                                                                                                                                                                                                                                                                                                                                                                                                                                                                                                                                                                                                                                                                                                                               |                                                                                                                         |
|-----------|-----------------------------------------------------------------------------------------------------------------------------------------------------------------------------------------------------------------------------------------------------------------------------------------------------------------------------------------------------------------------------------------------------------------------------------------------------------------------------------------------------------------------------------------------------------------------------------------------------------------------------------------------------------------------------------------------------------------------------------------------------------------------------------------------------------------------------------------------|-------------------------------------------------------------------------------------------------------------------------|
| <b>51</b> | IL1B, IL6, CSF1, IL1R1, IL27RA, TNFRSF9, TNFRSF12A, IL1RN, CCL4, CXCL1, CCL7, CXCL3, CCL5, CCRL2, CXCL8, RGS1, LIF, CD69, LAT, CD83, ADORA2A, CRIP1, HLA-DQB1, PFDN6, TRAF1, NKG7, PTX3, FCGR2B, TNFAIP6, PTGER2, CLEC5A, GPR183, TREM1, BIRC3, FCAR, TLR2, HIVEP1, FOSB, FOS, EGR3, PHLDA2, SERPINB2, FGFR1, EGR2, INSIG1, PDGFA, IER3, PDGFB, BTG2, KLF10, PLK3, NAMPT, TNFAIP3, TNFAIP8, MARCKSL1, CRABP2, IRF2, RASAL1, FLRT2, SMARCD3, RND3, KAL1, FLNB, CD151, ARF6, ALCAM, MAFF, MSC, NFKB1, BCL6, NFATC1, ATF3, NFKBIA, NFKBIE, MYC, EMP1, ELL2, TOP2A, GTF2H2, DUSP2, THBD, NR4A2, GEM, OLR1, GCH1, SPHK1, NDUFA7, HBEGF, JAG1, LDLR, SMAD7, MALT1, SPRY2, DUSP6, MAP2K3, CREM, DUSP1, MAP3K14, FUT4, JUN, CYTIP, FYN, PGGT1B, VRK2, AKAP13, TTK, ENC1, SLC16A6, HIST2H2AA3, CYP3A4, HIST1H1C, NDC80, STK17A, PELI1, KCNAB1, B4GALT4 | <a href="http://www.ncbi.nlm.nih.gov/pubmed/16911805">http://www.ncbi.nlm.nih.gov/pubmed/16911805</a>                   |
| <b>52</b> | MS4A2, TPSAB1, TPSAB2, CPA3, RGS13, C1orf186                                                                                                                                                                                                                                                                                                                                                                                                                                                                                                                                                                                                                                                                                                                                                                                                  | <a href="http://www.ncbi.nlm.nih.gov/pubmed/27677865">http://www.ncbi.nlm.nih.gov/pubmed/27677865</a>                   |
| <b>53</b> | CLC, CPA3, DNASE1L3, IL1B, ALPL, CXCR2                                                                                                                                                                                                                                                                                                                                                                                                                                                                                                                                                                                                                                                                                                                                                                                                        | <a href="http://www.ncbi.nlm.nih.gov/pubmed/24582314">http://www.ncbi.nlm.nih.gov/pubmed/24582314</a>                   |
| <b>54</b> | CD83, JMJD6, STAT4, TRAF1, SLC7A5, TBCD, NFKB1, CD44, DESI1, NELFE, XCL2, IL4R, DUSP2, DUSP4, NUP188                                                                                                                                                                                                                                                                                                                                                                                                                                                                                                                                                                                                                                                                                                                                          | <a href="http://www.ncbi.nlm.nih.gov/pmc/articles/PMC1253826/">http://www.ncbi.nlm.nih.gov/pmc/articles/PMC1253826/</a> |
| <b>55</b> | ADAM28, CNR2, FFAR3, LGALS12, PRSS33, SPNS3, ADAM8, CORO1A, FHL3, LTC4S, RAB37, TESC, ARAP3, CYP4F12, GGT5, MCTP2, RAB3D, TNFSF14, ASB2, DACH1, GPR56, MMP25, RD3, TREML2, ATP2A3, DAPK2, GPR97, NHSL2, RNASE2, TRPM6, CASS4, DGKD, ICAM3, P2RY2, RNASE3, TSPAN18, CD300LB, EMP4P, IFITM1, PADI2, SIGLEC10, VSTM1, CD69, FAM101B, IL1RL1, PADI4, SIGLEC8, CDA, FAM65B, IL5RA, PGLYRP1, SLC24A3, CHST15, FFAR2, KIF21B, PIK3R6, SORL1                                                                                                                                                                                                                                                                                                                                                                                                          | <a href="http://www.ncbi.nlm.nih.gov/pubmed/23844029">http://www.ncbi.nlm.nih.gov/pubmed/23844029</a>                   |
| <b>56</b> | CLC, SIGLEC8, EMR1, EMR4P, LGAL312, HRH4, CEBPE, DACH1, VSTM1                                                                                                                                                                                                                                                                                                                                                                                                                                                                                                                                                                                                                                                                                                                                                                                 | <a href="http://www.ncbi.nlm.nih.gov/pubmed/27677865">http://www.ncbi.nlm.nih.gov/pubmed/27677865</a>                   |

|    |                                                                                                                                                                                                                                                                                                                                                                                                                                                                                                                                                                                                                                                                                                                                                                                                                                                                                                                                                                                                                                                                                                                                                                                                                                                                                                                                                                                                                                                                                                                                                                                                                                                                                                                                |                                                                                                       |
|----|--------------------------------------------------------------------------------------------------------------------------------------------------------------------------------------------------------------------------------------------------------------------------------------------------------------------------------------------------------------------------------------------------------------------------------------------------------------------------------------------------------------------------------------------------------------------------------------------------------------------------------------------------------------------------------------------------------------------------------------------------------------------------------------------------------------------------------------------------------------------------------------------------------------------------------------------------------------------------------------------------------------------------------------------------------------------------------------------------------------------------------------------------------------------------------------------------------------------------------------------------------------------------------------------------------------------------------------------------------------------------------------------------------------------------------------------------------------------------------------------------------------------------------------------------------------------------------------------------------------------------------------------------------------------------------------------------------------------------------|-------------------------------------------------------------------------------------------------------|
| 57 | <p>CXCL10, IFIT1B, MX1, MX1, OASL, IFIT2, CMPK2, HAS2, RSAD2, HAS1, RSAD2, CXCL11, CSF1, TNFAIP6, IFIT1B, GBP2, RSAD2, RTP4, IRGM, RND1, GBP4, RTP4, IFIH1, IRGM, CMPK2, HAS2, CXCL9, IRGM, IFNB1, CSF1, IL6, ADAMTS4, STAT1, PTX3, GEM, TNFAIP3, PARP14, GBP6, ADAMTS4, DDX58, PYHIN1, FAM26F, TNFAIP2, USP18, MMP13, CCL4, CCL8, CCL11, PYHIN1, MT1H, PLSCR2, TNFAIP3, VCAM1, ADM, CXCL11, C12orf75, ATF3, CP, CCL20, CXCL9, TIMP1, SLFN11, HPX, SAA1, IFI44L, CCL22, NTS, CH25H, IRG1, IFI44L, FGG, MT1A, RGS16, CXCL3, CXCL3, CXCL3, CXCL6, CXCL8, LEP</p>                                                                                                                                                                                                                                                                                                                                                                                                                                                                                                                                                                                                                                                                                                                                                                                                                                                                                                                                                                                                                                                                                                                                                                 | <a href="http://www.ncbi.nlm.nih.gov/pubmed/22990623">http://www.ncbi.nlm.nih.gov/pubmed/22990623</a> |
| 58 | <p>NHLH1, CMPK2, IFIT2, CMPK2, GBP4, MX1, RSAD2, TOR3A, CD274, HERC6, DDX58, HERC6, HERC6, SAMD9L, STAT1, HERC6, GBP4, GBP2, GBP4, RNF213, MX1, ZNFX1, MITD1, PARP14, CXCL10, IRGM, GBP2, SETDB2, STAT1, IFIT1B, EIF2AK2, ENPP4, WARS, IRGM, IRGM, ATM, ASB13, WDR19, OASL, PML, PML, TLR3, IFIH1, RTP4, TOR3A, IFIT1B, SLFN11, ASB13, DDX60, STAT2, PARP11, TRIM5, STAT2, STAT1, TOR3A, TRIM6, RBL1, CXCL11, WDR19, DDX58, PARP9, TRIM21, USP18, WARS, DDX60, GBP2, DTX3L, IL15, GBP6, ENPP4, SLFN11, SECTM1, ADAR, MLKL, XAF1, RSAD2, INPP1, ZUFSP, WARS, MITD1, TRAFD1, RTP4, DHX58, UBE2L6, IDO1, LY6E, STAT1, IFI35, RSAD2, TRIM34, NAMPT, GNB4, CXCL9, NMI, IFI35, CXCL9, PLSCR2, PNPT1, HAS2, TRIM14, NLRC5, CXCL11, PYHIN1, DDX58, IRF9, HAP1, ZBP1, BATF2, IRF7, PYHIN1, DTX3L, DAXX, ZBP1, IFI44, KATNA1, SPATS2L, ADAR, Mar-05, PNP, NCOA7, SLFN5, FAM26F, SP100, IFI44L, RAB19, CX3CL1, ZNF836, PLEKHA4, SLFN11, ISG20, MISP, IFI44L, SERPINA3, CD40, SPPL2A, IFNB1, AIM1, MMP13, UBA7, ADAR, VCAM1, ZC3HAV1, SPATS2L, IFI44L, ATM, TOR1AIP2, TTC39B, DHX58, TMEM171, MOV10, CD40, PAPD7, TNFAIP6, SLFN12, PSMB8, LGALS9C, PARP14, ASAP3, TTC39B, HAS2, PSMB9, TAPBPL, ZSWIM5, CCRL2, CD40, CASP4, ATP10A, AREL1, DCP2, IL6, CCL5, UPP1, SLFN5, ECE2, APOL6, GCH1, CTRL, SP100, CX3CL1, CSF1, LAG3, IL18BP, TTC39B, TMEM106A, PNPT1, SPATS2L, TRIM25, RNF114, PLAC8, FCGR1A, SLC15A3, USP25, NAMPT, SLFN12, EPSTI1, GGT5, XAF1, CD69, CACNB4, SOCS1, MS4A4A, TLR2, ATF3, OAS3, SAMHD1, PYHIN1, GCH1, PPP1R14D, ASB13, TRIM5, LYPD8, NFKBIE, ARHGAP8, CSF1, CASP1, ZC3HAV1, PLA1A, BRIP1, CD86, SOCS1, CCL8, LGALS3BP, OSMR, CCL4, ETNK1, OAS2, TIFA, EPSTI1, ARID5A, PPA1, XDH, TNFAIP3, CNR1, NFKBIE, MS4A4A,</p> | <a href="http://www.ncbi.nlm.nih.gov/pubmed/22990623">http://www.ncbi.nlm.nih.gov/pubmed/22990623</a> |

|    |                                                                                                                                                                                                                                                                                                                                                                                                                                                                                                                                                                                                                                                                                                                                                                                                                                                                                                                                                                                                                                                                                                                                                                                   |                                                                                                              |
|----|-----------------------------------------------------------------------------------------------------------------------------------------------------------------------------------------------------------------------------------------------------------------------------------------------------------------------------------------------------------------------------------------------------------------------------------------------------------------------------------------------------------------------------------------------------------------------------------------------------------------------------------------------------------------------------------------------------------------------------------------------------------------------------------------------------------------------------------------------------------------------------------------------------------------------------------------------------------------------------------------------------------------------------------------------------------------------------------------------------------------------------------------------------------------------------------|--------------------------------------------------------------------------------------------------------------|
|    | <p>ERVFRD-1, CA13, PARP11, MARCKSL1, VCAM1, GLIPR2, LRRC4, SECTM1, GEM, RND1, PTX3, ARSI, AFTPH, NPC2, VCAN, GLIPR2, DNASE1L3, ABTB2, MS4A6A, SLC2A6, CA13, FRAS1, PAPSS2, MXD1, HSPBAP1, B2M, FAP, SLFN5, PCGF5, VCAM1, EPSTI1, MB21D1, ADAMTS4, PTPN2, IFNG, FCGR1A, GZMB, VCAN, POU3F1, CA13, TFPI2, TNFAIP3, VNN1, PML, IAPP, UBD, IRG1, ADAMTS6, IAPP, IAPP, RTN4RL2, DCK, TNFAIP2, RGS1, BCL3, CSRNP1, SLFN12, ADAMTS4, MT1H, KLRK1, VNN1, MSR1, IL12B, CH25H, NTS, CCL22, PYHIN1, IL1RN, TNF, CP, SOCS3, RAD54B, CCR2, TIMD4, TIMP1, XCL2, NAV3, IFITM1, HPX, DDX4, MS4A6A, GZMA, DCK, FCGR3B, CXorf21, NCR2, GPR84, MBD1, MSR1, IL1RN, SELP, IL1RN, MSR1, NCR1, SAA1, SLFN12, CCL3L1, MT1A, CXCL3, FGG, CXCL3, RGS16, CXCL3, ORM2, C15orf48, CXCL8</p>                                                                                                                                                                                                                                                                                                                                                                                                                    |                                                                                                              |
| 59 | <p>KIF26B, CXXC4, DCDK1, FMO3, SPTSSB, 37865, HMGCS2, ADH7, RAB17, ASGR1, HEPACAM2, CCDC176, CLDN8, SYT17, PCLO, TMEM232, GDF10, ATP6V1B1, C11orf87, CDH26</p>                                                                                                                                                                                                                                                                                                                                                                                                                                                                                                                                                                                                                                                                                                                                                                                                                                                                                                                                                                                                                    | <p><a href="http://www.ncbi.nlm.nih.gov/pubmed/22990623">http://www.ncbi.nlm.nih.gov/pubmed/22990623</a></p> |
| 60 | <p>IFIT2, CMPK2, CXCL9, IL18BP, CXCL10, STAT1, CXCL11, CD274, GBP4, HERC6, HERC6, MX1, HERC6, ZBP1, RNF213, RSAD2, TRIM5, BST2, IRF7, GBP2, LAG3, IRGM, IRGM, TOR3A, SAMD9L, OASL, MX1, XAF1, IFI44L, STAT2, IDO1, SPPL2A, ZNFX1, HERC6, STAT2, IRGM, CXCL9, GBP4, IFIT1B, PARP11, UBE2L6, ZBP1, PYHIN1, IFI27, IFI35, TOR3A, CMPK2, PYHIN1, USP18, LGALS3BP, DDX60, RTP4, RSAD2, MLKL, GBP2, STAT1, COL11A2, MS4A6A, UBA7, ISG20, GBP2, ADAR, DTX3L, IFIT1B, DHX58, GBP6, DHX58, TRIM34, RTP4, MS4A4A, OAS3, RSAD2, DDX58, IFI44L, MTHFD2, IFI44, IFI44L, TRIM6, DDX60, IRF9, PML, IFIH1, FCGR1A, PLA1A, PSMB8, CXCL11, CNGB3, EIF2AK2, PARP9, FCGR1A, NMI, MS4A4A, LYPD8, SECTM1, GZMB, NLRC5, APOD, MS4A6A, TRIM5, PLEKHA4, CLEC4A, CCR2, PSMB9, APOL6, DNASE1L3, MTHFD2, SLFN11, EPSTI1, PLAC8, ACP2, LAIR2, LGALS9C, TMEM106A, SIGLEC1, PML, FAM26F, IL1RN, GPR84, TAPBP, C2, LY6E, TMEM106A, HAP1, LAIR2, XCL2, SPATS2L, IL1RN, AIM1, OAS2, HCK, BATF2, EPSTI1, TRIM14, SLFN12, STAT1, IL1RN, CCL5, SLAMF9, UBD, MSR1, HPSE, OCSTAMP, FCER1G, AIF1, PYHIN1, DNASE1L3, LAIR2, MSR1, EVI2A, SCT, NAIP, ZC3HAV1, KLRK1, CST7, DCK, CCL8, MSR1, DAXX, SLC39A2, TLR3, CASP4,</p> | <p><a href="http://www.ncbi.nlm.nih.gov/pubmed/22990623">http://www.ncbi.nlm.nih.gov/pubmed/22990623</a></p> |

|    |                                                                                                                                                                                                                                                                                                                                                                                                                                                                                                                                                                                                                                                                                                                                                                                                                                                                                                                                                                                                                                                                                                                                                                                                                                                                                                                                                                                                                                                                                                                                                                                                                                                                                                           |                                                                                                              |
|----|-----------------------------------------------------------------------------------------------------------------------------------------------------------------------------------------------------------------------------------------------------------------------------------------------------------------------------------------------------------------------------------------------------------------------------------------------------------------------------------------------------------------------------------------------------------------------------------------------------------------------------------------------------------------------------------------------------------------------------------------------------------------------------------------------------------------------------------------------------------------------------------------------------------------------------------------------------------------------------------------------------------------------------------------------------------------------------------------------------------------------------------------------------------------------------------------------------------------------------------------------------------------------------------------------------------------------------------------------------------------------------------------------------------------------------------------------------------------------------------------------------------------------------------------------------------------------------------------------------------------------------------------------------------------------------------------------------------|--------------------------------------------------------------------------------------------------------------|
|    | <p>TGFB1, SLFN12, PYCARD, ADAR, TREML4, SLC2A6, SETDB2, THEMIS2, MSR1, SERPINA3, TIMP1, IL6, GNGT2, SLC15A3, VCAN, FCGR2A, NCR2, CCL4, CCR2, TRIM21, CYBB, SIRPG, IKBKG, BEX4, CA13, CYBB, FGR, VCAM1, CASP1, CCR2, SLFN11, SLC7A5, IRG1, CLEC5A, DDX58, SLFN5, FCGR3B, DCK, KLK1, CA13, RUNX3, TIFAB, APOBEC1, PARP14, MYO1F, AFTPH, MISP, EMR3, TLR7, XDH, SLAMF7, SEMA4D, PLEK, PRF1, AFTPH, DCP2, CYBB, TNFRSF1B, CD86, SLAMF8, HAVCR2, GLIPR2, KLK1, FPR2, IGSF6, NAMPT, CD180, SPI1, VCAN, TGFB1, SLFN11, TRIM25, HPX, LST1, CXorf21, SLFN12, XAF1, GLIPR2, BID, VCAN, PTPN6, NFKBIE, NFKBIE, C3AR1, MILR1, CD69, IFI27, PLD4, PPA1, ORM2, UPP1, PLEK, C3AR1, Mar-01, TLR2, GCH1, FASLG, VCAM1, SPIC, FASLG, CXCL13, P2RY13, GPR35, IL12B, CD48, DDX4, GZMB, SPIC, CA13, IL2RB, SFRP1, CD68, CLEC4A, PARP11, CTSW, SERPINA3, ABCB1, PILRB, CD80, CD40, KLRB1, TIFAB, GPR65, LCP2, FCGR2A, RGS1, VNN1, EPSTI1, C15orf48, EMR3, LILRB2, CCR9, GPR114, FOSL1, CD300A, SAA1, MS4A4A, CH25H, VAV1, FCGR2A, DCLK1, CD33, B2M, GZMA, MS4A7, CCR9, NKG7, IL12B, CCR2, CXCL13, SAMSN1, HAVCR1, KLRB1, RASA4, COCH, PTPRO, GPR171, C3AR1, FGR, NCR1, NCF4, CCL8, POU3F1, PLA2G7, CLEC4E, F10, FCGR2A, IFITM1, SLFN12, CD8A, LCP2, CLEC6A, CD8A, CXCL3, TLR1, GZMK, LPXN, ITIH1, DUSP2, TBX21, SELP, CD72, CD8A, SELL, FYB, ADM, UPB1, CLEC4E, RNASE6, KLK1, TNFRSF9, LAT2, OOEP, VNN1, PTPN2, CXCL3, CLEC6A, IL2RB, PIWIL2, CXCL3, TNF, CCR2, TNFRSF9, MAB21L3, TNFAIP2, ATF3, LCN2, ERVFRD-1, IL18RAP, AOA, SECTM1, CCR2, ZC3H12A, IFNG, IFNB1, CXCL6, CD244, TLR7, CCR1, IL10RA, CSF3, CCL3L1, CD53, GIMAP7, TNFAIP6, FST, NOXO1, RGS16, CCR1, RFPL3, CXCL8, EOMES, CCL15, ADAMTS4, KLRC2, SLA2, GPR176</p> |                                                                                                              |
| 61 | <p>GLS, HEPACAM2, RELN, GRIA1, GPC6, ACAA1, GRIA1, DIRAS2, GSTA1, LRRC17, HTRA3, FCRL2, GDF10, GPC6, ASGR1, DNAH6, SLC7A10, PON1, RYR3, DNER, NOTUM, KIF26B, GNG4, RBFOX3, FAT3, CD207, BCAN, CD163, SYT17, PER1, SHISA9, CES2, DCDK1, NTM, ATP6V1B1, SCARA5, DNER, KLF15, FMO3, CNTN4, GLB1L3, CYP1A1, ANGPTL7, OLFM2, CD209, C11orf87, FABP1, FABP1, HPCAL4, NTRK2, DHRS7C, TTN, TMEM182, TTN, TTN, MB,</p>                                                                                                                                                                                                                                                                                                                                                                                                                                                                                                                                                                                                                                                                                                                                                                                                                                                                                                                                                                                                                                                                                                                                                                                                                                                                                             | <p><a href="http://www.ncbi.nlm.nih.gov/pubmed/22990623">http://www.ncbi.nlm.nih.gov/pubmed/22990623</a></p> |

|           |                                                                                                                                                                                                                                                                                                                                                                                                                                                                                                                                                                                                                                                                                                                                                                                                                                                                                                                                                                                                                                                                                                                                                                              |                                                                                                       |
|-----------|------------------------------------------------------------------------------------------------------------------------------------------------------------------------------------------------------------------------------------------------------------------------------------------------------------------------------------------------------------------------------------------------------------------------------------------------------------------------------------------------------------------------------------------------------------------------------------------------------------------------------------------------------------------------------------------------------------------------------------------------------------------------------------------------------------------------------------------------------------------------------------------------------------------------------------------------------------------------------------------------------------------------------------------------------------------------------------------------------------------------------------------------------------------------------|-------------------------------------------------------------------------------------------------------|
| <b>62</b> | IRF7, APOD, ZBP1, IFI44L, CXCL10, GBP4, PYHIN1, PYHIN1, ZBP1, IFI44, CXCL9, IFIT1B, CXCL11, LY6E, LGALS3BP, USP18, DDX60, SIGLEC1, GBP6, RTP4, LAIR2, MX1, IFI44L, BST2, MX1, RTP4, MS4A6A, XAF1, C3AR1, DDX60, SLAMF9, C3AR1, CMPK2, STAT1, CCR2, FCGR1A, OASL, IFIT2, MS4A4A, FCGR1A, OAS3, C3AR1, LAIR2, IL18BP, OAS2, AIF1, DHX58, LAIR2, CCR2, IRGM, HERC6, TM4SF5, APOC2, SLFN12, MS4A7, CNGB3, MS4A4A, MS4A6A, HERC6, IFI44L, APOBEC1, CCR2, FCGR2A, HERC6, RSAD2, PLA1A, MSR1, CXCL9, GDF3, TIMP1, IL12B, RSAD2, SLFN11, CLEC4A, CCR2, SIRPG, HERC6, B2M, SAA1, IFI27, NLRC5, CLEC4A, CCR2, FCGR2A, EPSTI1, CCL5, CLEC5A, BEX4, CCR2, CD72, SLFN12, MSR1, EPSTI1, TRIM5, MILR1, STAT1, XCL2, FCGR2A, FCGR2A, LPXN, DCK, GPR114, GPR65, MSR1, LST1, VNN1, DHX58, FAM26F, RSAD2, CCR1, MSR1, SAA4, CCL4, CCL8, NCR2, CXCL3, PYHIN1, CCR9, KLRK1, GZMK, IRG1, HAVCR1, PARP14, CCR2, MS4A7, RGS1, CXCL3, CXCL3, KLK1, CH25H, FYB, CXorf21, HPX, GPR35, CD180, FCGR3B, CXCL13, SLFN12, IL6, TLR1, KLK1, CXCL6, ORM2, TNFRSF9, CA13, KLK1, KLRB1, GZMB, C15orf48, EMR3, RGS16, CXCL13, ADAMTS4, CYBB, CXCL11, IL1RN, RFPL3, SLC26A4, CXCL8, UBD, CCL3L1, IFNG, IL1RN, ORM2 | <a href="http://www.ncbi.nlm.nih.gov/pubmed/22990623">http://www.ncbi.nlm.nih.gov/pubmed/22990623</a> |
| <b>63</b> | GRIA1, GRIA1, HEPACAM2, ACAA1, CNTN1, ASGR1, CD207, CD209, SCARA5, FABP1, FABP1, ITGB1BP2, SLC47A1, MYL3, MYL3, MYL3, MB, MYL7, TNNC1, MYL4, SMPX, RYR2, TTN, TTN, CASQ2, PGAM2, CKMT2, SRL, TTN, DHRS7C, CA3, TRDN, TCAP, TTN, TNNT2, LDB3, CFD, MYOZ2, TNNT2, TNNT2, MYBPHL, CSRP3, TXLNB                                                                                                                                                                                                                                                                                                                                                                                                                                                                                                                                                                                                                                                                                                                                                                                                                                                                                  | <a href="http://www.ncbi.nlm.nih.gov/pubmed/22990623">http://www.ncbi.nlm.nih.gov/pubmed/22990623</a> |
| <b>64</b> | IRF7, APOD, CCNA1, PYHIN1, IFI44L, TOMM20L, PYHIN1, IFI44, IFI27, IFI44L, IFIT1B, MS4A7, OAS2, CXCL10, MX1, DDX60, ZBP1, CCR2, C3AR1, ZBP1, SPAG5, CXCL9, SAA1, CCDC67, CCR2, FCGR1A, KLK1, KLK1, OAS3, MX1, MS4A4A, SRSF11, NCAPG, CDK10, CEP55, MS4A4A, CCR2, ESCO2, CCR2, OASL, RGS1, SLFN12, IL12B, KLK1, ORM2, CXCL11, CXCL8, IRG1, CXCL3, CXCL3, CXCL3, SLC26A4, AGR2, CLCA1                                                                                                                                                                                                                                                                                                                                                                                                                                                                                                                                                                                                                                                                                                                                                                                           | <a href="http://www.ncbi.nlm.nih.gov/pubmed/22990623">http://www.ncbi.nlm.nih.gov/pubmed/22990623</a> |
| <b>65</b> | APOD, IRF7, MS4A7, PYHIN1, C3AR1, C3AR1, CCL8, CCR2, MS4A7, PYHIN1, CCR2, C3AR1, CCNA1, IFI44L, SPAG5, TOMM20L, MX1, CDK10, CXCL9, IFI27, IL12B, SAA1, CEP55, OAS2, HAL, IFI44L, ESCO2, CXCL10, RGS1, HMMR, CH25H, CXCL11, ESCO2, C15orf48, ORM2,                                                                                                                                                                                                                                                                                                                                                                                                                                                                                                                                                                                                                                                                                                                                                                                                                                                                                                                            | <a href="http://www.ncbi.nlm.nih.gov/pubmed/22990623">http://www.ncbi.nlm.nih.gov/pubmed/22990623</a> |

|           |                                                                                                                                                                                                                                                                                                                                                                                                                                                                                                                                                                                                                                                                                                                                                                                                                                                                                                                                                                                                                                                                                                                                    |                                                                                                       |
|-----------|------------------------------------------------------------------------------------------------------------------------------------------------------------------------------------------------------------------------------------------------------------------------------------------------------------------------------------------------------------------------------------------------------------------------------------------------------------------------------------------------------------------------------------------------------------------------------------------------------------------------------------------------------------------------------------------------------------------------------------------------------------------------------------------------------------------------------------------------------------------------------------------------------------------------------------------------------------------------------------------------------------------------------------------------------------------------------------------------------------------------------------|-------------------------------------------------------------------------------------------------------|
|           | CXCL8, IRG1, AGR2                                                                                                                                                                                                                                                                                                                                                                                                                                                                                                                                                                                                                                                                                                                                                                                                                                                                                                                                                                                                                                                                                                                  |                                                                                                       |
| <b>66</b> | CNTN1, CD209, FABP1, FOSB, ZBTB16,                                                                                                                                                                                                                                                                                                                                                                                                                                                                                                                                                                                                                                                                                                                                                                                                                                                                                                                                                                                                                                                                                                 | <a href="http://www.ncbi.nlm.nih.gov/pubmed/22990623">http://www.ncbi.nlm.nih.gov/pubmed/22990623</a> |
| <b>67</b> | GDF15, AEN, CCNG1, CDKN1A, EDA2R, CELF5, DDIAS, PSRC1, THEM5, PSAPL1, SAA1, CXCL3, CXCL10, RSAD2, ORM2, CCL20, CXCL6, TIMP1, CXCL8, CCL8, SLC26A4, IL6, ADAMTS4, CXCL9                                                                                                                                                                                                                                                                                                                                                                                                                                                                                                                                                                                                                                                                                                                                                                                                                                                                                                                                                             | <a href="http://www.ncbi.nlm.nih.gov/pubmed/23565148">http://www.ncbi.nlm.nih.gov/pubmed/23565148</a> |
| <b>68</b> | HERC6, VCAN, RSAD2, MX1, IFIT1B, DHX58, IFI44, IRF7, CXCL11, CXCL10, OAS3, FCGR1A, GDF15, MS4A6A, CXCL8, ZBP1, OASL, CYP7B1, DDIAS, SAA1, EDA2R, OAS2, APOD, SERPINA3, CELF5, CXCL3, TIMP1, PSRC1, CCL8, SECTM1, C15orf48, CCR2, CH25H, ORM2, MSR1, FOSL1, IRG1, CXCL6, SPINK1, LIF, SLFN12, IL6, CXCL9, IL1RN, EREG, MORC1, CXCL13, TNC, CHL1, CD177, BCAT1, ADAMTS4, SPRR1B,                                                                                                                                                                                                                                                                                                                                                                                                                                                                                                                                                                                                                                                                                                                                                     | <a href="http://www.ncbi.nlm.nih.gov/pubmed/23565148">http://www.ncbi.nlm.nih.gov/pubmed/23565148</a> |
| <b>69</b> | BEX2, ATP6V1B1, ASGR1, ACVR1C, PCK1, ADIPOQ, CA3, TMEM45B, CFD                                                                                                                                                                                                                                                                                                                                                                                                                                                                                                                                                                                                                                                                                                                                                                                                                                                                                                                                                                                                                                                                     | <a href="http://www.ncbi.nlm.nih.gov/pubmed/23565148">http://www.ncbi.nlm.nih.gov/pubmed/23565148</a> |
| <b>70</b> | CWH43, NTM, SFRP1, IL23A, SPRR1B, FCGR2A, PSRC1, CLDN4, GPNMB, CLEC5A, CDCA8, ATG9B, C3AR1, DCSTAMP, CCNG1, TREM2, CENPH, EXO1, TPX2, DDIAS, CPA4, CHODL, C1QA, NRIP3, AURKB, PIF1, C1QB, TFPI2, PLA1A, FST, PKHD1, GAS2L3, MSR1, SPP1, SHCBP1, C1QC, CCNB2, WFDC12, CLDN6, CCNA2, LRR1, FIGNL1, CHL1, FCRL2, NRCAM, CDCA3, BRINP1, SPC25, CLSPN, STIL, KIAA0101, TRIP13, CEP55, CD200R1L, CDCA5, SKA1, PTGER4, KIF11, VCAN, MMP10, CLEC4A, KIF2C, CCR2, SERPINB2, KIAA1524, CYP7B1, HTR7, C15orf48, GTSE1, VSIG4, PARPBP, CLEC6A, EDA2R, SERPINA3, NCAPG, MIS18BP1, CERS3, KIF18B, SPAG5, RAD51, COL24A1, MS4A6A, CGREF1, CDKN3, TK1, S100A14, NUSAP1, CDK1, GPR85, ELN, CCL17, TNC, FN1, CCL8, TIMP1, DTL, CENPE, P4HA3, CHSY3, E2F8, DEPDC1, ASPM, CENPP, CDK10, TTK, GPR176, GJB4, GATM, DMP1, EREG, THBS4, IQGAP3, CHEK1, FAM3B, RGS16, ESCO2, GJB5, CA13, CASC5, RTN4RL2, UBE2C, FCGR1A, HTR4, HMMR, KLHDC8A, RAD51AP1, MS4A7, TGM1, CCL15, AADAC, PBK, FBN1, DDIT4L, WISP1, LIF, PRSS22, E2F7, HAS2, GDF15, FXYP4, GLOD5, ADAMTS12, GCNT3, LAMA1, CSMD1, HNF4A, FKBP5, CDKN1A, MMP13, CENPF, CXCL10, FOSL1, ACKR1, ALDH1A3, | <a href="http://www.ncbi.nlm.nih.gov/pubmed/23565148">http://www.ncbi.nlm.nih.gov/pubmed/23565148</a> |



|           |                                                                                                                                                                                                                                                                                                                                                                                                                                                                                                                                                                                                                                                                                                                                                                                                                                                                                                                                                                                                                                                       |                                                                                                       |
|-----------|-------------------------------------------------------------------------------------------------------------------------------------------------------------------------------------------------------------------------------------------------------------------------------------------------------------------------------------------------------------------------------------------------------------------------------------------------------------------------------------------------------------------------------------------------------------------------------------------------------------------------------------------------------------------------------------------------------------------------------------------------------------------------------------------------------------------------------------------------------------------------------------------------------------------------------------------------------------------------------------------------------------------------------------------------------|-------------------------------------------------------------------------------------------------------|
|           | SLC26A4, CCR1, SAA1, SECTM1, CEMIP, TUBB3, CILP, RHBDL2, BCL2L15, BCAT1, PTX3, CALCA, CELF5, CXCL9, ADAMTS4, IL1RL1, SPINK1, CLDN2, CH25H, IL1RN, CXCL13, TFAP2A, MORC1, ORM2, CD177, IL6                                                                                                                                                                                                                                                                                                                                                                                                                                                                                                                                                                                                                                                                                                                                                                                                                                                             |                                                                                                       |
| <b>71</b> | IGFBP3, ECM2, ASGR1, SLC7A10, CYP1A1, KIAA0408, FABP1, BCAN, CST8, SNCA, ALAS2                                                                                                                                                                                                                                                                                                                                                                                                                                                                                                                                                                                                                                                                                                                                                                                                                                                                                                                                                                        | <a href="http://www.ncbi.nlm.nih.gov/pubmed/23565148">http://www.ncbi.nlm.nih.gov/pubmed/23565148</a> |
| <b>72</b> | THBS4, ANKRD34B, PSRC1, FN1, ELN, SFRP1, TREM2, COL24A1, NRCAM, EXO1, KIF11, PIF1, CDCA8, CD200R1L, COL5A2, FXD4, CDCA2, PKHD1, THBS2, CHODL, AURKB, CCNA2, P4HA3, KIAA0101, STIL, ZRANB3, C3AR1, C1QB, AADAC, LHFPL2, GAS2L3, GLOD5, ADAMTS12, ILDR2, CTHRC1, C1QA, TPX2, TNC, CLEC6A, FBN2, C1QC, CCNB2, CEP55, CDK10, TTK, LRR1, CENPF, CFI, CDCA3, ADAM12, SPP1, SYT13, DEPDC1, CTSK, CCR2, CDK1, CASC5, SKA1, KIF18B, PTX3, CSMD1, FMOD, LAMA1, MIS18BP1, NCAPG, ASPM, CLSPN, CILP, DCSTAMP, GPNMB, SPAG5, CLEC5A, RAD51, FRZB, MS4A7, BRINP1, EDA2R, DDIAS, KIF2C, ATG9B, CHSY3, DTL, FST, E2F8, SHCBP1, IQGAP3, CERS3, GPR176, SPRR1B, PARPBP, UBE2C, CDCA5, CEMIP, CENPP, CDKN1A, MMP10, DMP1, HAS2, TMEM26, PBK, FBN1, CDKN3, E2F7, MSR1, CENPE, PLA1A, NUSAP1, CHL1, COL5A3, ESCO2, CLDN4, RAD51AP1, TUBB3, IGF1, IL1RL1, HMMR, MS4A6A, MEGF10, EREG, TIMP1, WFDC12, PDCD1, MMP13, CTLA4, FCGR1A, C15orf48, TFAP2A, CELF5, ADAMTS4, ACKR1, CCL8, IBSP, RGS16, LIF, PRND, IL1RN, GREM1, BCAT1, FOSL1, CXCL10, SAA1, SLC26A4, CXCL9, IGJ, IL6 | <a href="http://www.ncbi.nlm.nih.gov/pubmed/23565148">http://www.ncbi.nlm.nih.gov/pubmed/23565148</a> |
| <b>73</b> | IGFBP3, ASGR1, BEX2, TMEM132D, SLC7A10, CYP1A1, NRN1, KCNA2, FABP12, FABP1, CST8, GRIA1, ANKRD63, KRT79, CIDEC, CYP2E1, CA3, RETN, ADIPOQ, PCK1, CFD, TMEM45B, SMPX, NPPA,                                                                                                                                                                                                                                                                                                                                                                                                                                                                                                                                                                                                                                                                                                                                                                                                                                                                            | <a href="http://www.ncbi.nlm.nih.gov/pubmed/23565148">http://www.ncbi.nlm.nih.gov/pubmed/23565148</a> |
| <b>74</b> | CD200R1L, CLEC6A, ATP6V0D2, LHFPL2, PSRC1, ANKRD34B, FXD4, ZRANB3, AADAC, CTSK, OLR1, TREM2, F7, GPNMB, MS4A6A, SLC26A4, CCR2, MSR1, EDA2R, MMP13, EREG, COL24A1, MS4A7, CDKN1A, CCL3L1, TNC, SPRR1B, IL1RL1, CEP55, PTX3, C3AR1, IL1RN, ESCO2, DMP1, CCL8, RGS16, CHODL, SAA1, CHL1, IGJ, ADAMTS4, ORM2, GP2, IL6                                                                                                                                                                                                                                                                                                                                                                                                                                                                                                                                                                                                                                                                                                                                    | <a href="http://www.ncbi.nlm.nih.gov/pubmed/23565148">http://www.ncbi.nlm.nih.gov/pubmed/23565148</a> |
| <b>75</b> | CNN1, BEX2, GRIA1, ANKRD63, NR4A1, TNNT3                                                                                                                                                                                                                                                                                                                                                                                                                                                                                                                                                                                                                                                                                                                                                                                                                                                                                                                                                                                                              | <a href="http://www.ncbi.nlm.nih.gov/pubmed/23565148">http://www.ncbi.nlm.nih.gov/pubmed/23565148</a> |

|           |                                                                                                                                                                                                                                                                                                                                                                                                                                                                                                                                                                                                                                                   |                                                                                                       |
|-----------|---------------------------------------------------------------------------------------------------------------------------------------------------------------------------------------------------------------------------------------------------------------------------------------------------------------------------------------------------------------------------------------------------------------------------------------------------------------------------------------------------------------------------------------------------------------------------------------------------------------------------------------------------|-------------------------------------------------------------------------------------------------------|
| <b>76</b> | TREM2, ZRANB3, ANKRD34B, CLEC6A, PSRC1, GPNMB, FXYD4, COL24A1, THBS4, MS4A7, MSR1, DMP1, SERPINB5, CLEC4D, IL1RN, SPRR1B, CHODL, IGJ, TNC, EREG, PKP1, CHL1, SAA1                                                                                                                                                                                                                                                                                                                                                                                                                                                                                 | <a href="http://www.ncbi.nlm.nih.gov/pubmed/23565148">http://www.ncbi.nlm.nih.gov/pubmed/23565148</a> |
| <b>77</b> | BEX2, TMEM132D, SLC4A1, FABP1, TBX20, KCNJ3, TRDN                                                                                                                                                                                                                                                                                                                                                                                                                                                                                                                                                                                                 | <a href="http://www.ncbi.nlm.nih.gov/pubmed/23565148">http://www.ncbi.nlm.nih.gov/pubmed/23565148</a> |
| <b>78</b> | PSRC1, TREM2, ZRANB3, CLEC6A, SLC26A4, FXYD4, CDKN1A, TNC, MS4A7, MS4A6A, GPR176, EREG, COL24A1, NTRK2, GPNMB, C3AR1, IGJ, CCL8, SPRR1B, RGS16, TFAP2A, DMP1, CHL1, CHODL, SAA1, IGHM, ADAMTS4, CXCL9                                                                                                                                                                                                                                                                                                                                                                                                                                             | <a href="http://www.ncbi.nlm.nih.gov/pubmed/23565148">http://www.ncbi.nlm.nih.gov/pubmed/23565148</a> |
| <b>79</b> | ABLIM3, ADAMDEC1, ADM, ADORA3, ALOX15B, ANGPTL4, ARID5B, BIN1, C1QB, CAMP, CCL7, CCL8, CD163, CES1, CES1P1, CYFIP2, DAAM2, DDIT4, DHRS9, DPYSL3, FBLN5, FKBP1A, FKBP5, FLVCR2, GADD45B, GLDN, HIPK2, HPGD, HS3ST2, HTRA1, IL1R2, IRS2, KCNMA1, KLF9, MERTK, METTL7A, METTL7B, MFG8, MMP19, MS4A6E, MT1A, MT2A, MTMR11, MTSS1, NAPS, OLFML2B, PAPSS2, PCOLCE2, PDK4, PHLDA1, PLIN2, PMP22, PPARGC1A, PTGER2, RBP7, RCAN1, RNASE1, SDC4, SERPINE1, SERPINF1, SESN1, SH3PXD2B, SLA, SLC16A10, SLC16A6, SLC1A3, SLC29A1, SPRY1, SRPX, TBC1D16, TCN2, TFCP2L1, TFPI, THBS1, TIAM2, TMEM236, TPST1, TSC22D3, VSIG4, ZCCHC6                              | <a href="http://www.ncbi.nlm.nih.gov/pubmed/24395918">http://www.ncbi.nlm.nih.gov/pubmed/24395918</a> |
| <b>80</b> | ABCG1, ACAT2, ATP8B4, BCL11A, CCL22, CD4, CD74, CD93, CDH23, CHI3L1, CHST13, CIR1, CLEC4A, CYB561A3, CYP27B1, ENTPD1, EPSTI1, FAIM, FCN1, FSCN1, GAL, GBP5, GIMAP4, GJB2, GM2A, GREM1, GSTM1, GSTM2, H2AFY2, HAMP, HCP5, HK3, HLA-DOA, HLA-DPA1, HLA-DPB1, HLA-DQA1, HLA-DRA, HLA-DRB3, HLA-DRB4, HLA-DRB6, HLA-F, HMG20B, HPSE, HSD11B1, HTRA4, IFI27, IFIT1, IL18BP, KIAA0101, LILRA3, LILRA5, LST1, LXN, MMP7, MMP9, MX1, NBEAL2, OAS2, PGD, PLAU, PTGS1, PTTG1, PTTG3P, RARRES1, RARRES3, RASSF4, RGS12, RHBDF1, SCG5, SLC2A5, ST6GAL1, STAT1, TAP1, TDRD9, TGFBI, TGM2, TIMP3, TMEM138, TNFSF13B, TNNI2, TSC22D1, TSPAN32, TXNRD1, VWF, WARS | <a href="http://www.ncbi.nlm.nih.gov/pubmed/24395918">http://www.ncbi.nlm.nih.gov/pubmed/24395918</a> |

|    |                                                                                                                                                                                                                                                                                                                                                                                                                                                                                                                                                                                                                                                                                                                                                                                                                                                                                                                                                                  |                                                                                                       |
|----|------------------------------------------------------------------------------------------------------------------------------------------------------------------------------------------------------------------------------------------------------------------------------------------------------------------------------------------------------------------------------------------------------------------------------------------------------------------------------------------------------------------------------------------------------------------------------------------------------------------------------------------------------------------------------------------------------------------------------------------------------------------------------------------------------------------------------------------------------------------------------------------------------------------------------------------------------------------|-------------------------------------------------------------------------------------------------------|
| 81 | <p>DUSP1, NFKBIA, TFCP2L1, SRGN, TNFAIP3, AGPAT2, SH2D4A, METTL7A, RHOU, PRDM1, ISG20, ITGB1, CITED2, RABAC1, TXNIP, ABHD5, ERMAP, KLF9, CEBPD, FKBP5, MAL, PDK4, ERFFI1, DDIT4, PERP, AHNAK, ADHFE1, TMEM56, CYSTM1, LYPD6B, ADORA2B, ALOX5AP, KLF5, TSPO, CAPG, CD9, COL4A3, FCER1G, GLRX, LMO7, LOX, RGS1, S100A6, SDC1, RASSF7, VAMP8, MAP3K6, CYTIP, SPRY1, TIPARP, HILPDA, FXYD5, PNPLA2, NCEH1, TMEM243, HOPX, PARD6B, BIRC3, GLUL, SOCS1, TBC1D2, EMILIN2, PRDX6, ANG, ERN1, OLR1, MMRN1, CGN, CCND3, LTB4R, IL6ST, MT1X, MT2A, PER1, PYGB, IL1R2, HOMER2, CCHCR1, CHPT1, DEPTOR, SFXN5, CYP4V2, SEC14L1, SOD2, HRASLS2, TMEM62, ZC3H12A, SLC41A2, TMEM116, RHOB, ATP6V0A1, C5AR1, KLF6, GADD45A, FCGR2A, GCNT1, GCLC, HAGH, FOXN2, KCNK1, MYH6, POU5F1, MAPK13, PXN, MARCO, IL18RAP, PER2, P4HA2, LPIN2, HERPUD1, SPRY2, FSTL3, SERINC3, ELL2, ZNF281, PIK3R5, MKRN1, RASD1, SLC37A1, EPB41L4B, TRIB3, TMEM8A, PLEKHF2, SLC16A10, SLC25A29, RNF149,</p> | <a href="http://www.ncbi.nlm.nih.gov/pubmed/25192440">http://www.ncbi.nlm.nih.gov/pubmed/25192440</a> |
| 82 | <p>HLA-DRB1, MDK, PASK, CDKN2C, E2F7, TNFSF10, AURKA, ADAM19, CKAP4, SPDL1, CDK1, VCAN, DBN1, IGFBP4, KIF20B, DEPDC1, CENPK, BORA, HLA-DMA, ST8SIA4, C12orf75, CAMK4, CYP1A1, DDIT3, DNMT3A, GEM, GUCY1A3, ITGA1, LCK, PDE4B, PDGFRB, PLK1, SOX4, SPIB, ZEB1, ZNF207, FZD3, ENC1, BHLHE40, IER3, NREP, GDF15, IER2, ZEB2, PLK2, FNBP4, ANGPTL2, SLC39A6, PARM1, RND1, UBE2T, DACT1, ARRD3, MARCKSL1, C1orf54, VASH2, NETO2, CDCA3, AFAP1L2, SGOL1, TUBB2B, TCF7, BCL2, HES1, PHIP, PKIA, TIA1, GIT2, CCDC88A, ABLIM1, SLC5A3, WIPI1, MAP3K8, SMARCC1, MAP3K14, INTS6, EPHB1, HOXB2, ID3, ITGA4, MEF2D, NAB2, CDK17, POLB, ST3GAL2, TNFSF9, SUCLA2, TRAF4, CLCF1, PPP1R15A, RASGRP3, MOXD1, SERTAD3, EVL, DPH5, ZFR, BCL11A, ACKR3, PELI1, PLEKHG1, TGIF2, DOCK7, L3HYPDH, MB21D1, RHOF, ARL5B,</p>                                                                                                                                                               | <a href="http://www.ncbi.nlm.nih.gov/pubmed/25192440">http://www.ncbi.nlm.nih.gov/pubmed/25192440</a> |
| 83 | <p>DUSP1, NFKBIA, TFCP2L1, SRGN, TNFAIP3, AGPAT2, SH2D4A, METTL7A, RHOU, PRDM1, ISG20, ITGB1, CITED2, RABAC1, TXNIP, ABHD5, ERMAP, KLF9, CEBPD, FKBP5, MAL, PDK4, ERFFI1, DDIT4, PERP, AHNAK, ADHFE1, TMEM56, CYSTM1, LYPD6B, ADORA2B, ALOX5AP, KLF5, TSPO, CAPG, CD9, COL4A3, FCER1G, GLRX, LMO7, LOX, RGS1, S100A6, SDC1, RASSF7, VAMP8, MAP3K6, CYTIP, SPRY1, TIPARP, HILPDA, FXYD5, PNPLA2, NCEH1,</p>                                                                                                                                                                                                                                                                                                                                                                                                                                                                                                                                                       | <a href="http://www.ncbi.nlm.nih.gov/pubmed/25192440">http://www.ncbi.nlm.nih.gov/pubmed/25192440</a> |

|           |                                                                                                                                                                                                                                                                                                                                                                                                                                                                                                                                                                                                                                                                                                                                                                                                                                                                             |                                                                                                       |
|-----------|-----------------------------------------------------------------------------------------------------------------------------------------------------------------------------------------------------------------------------------------------------------------------------------------------------------------------------------------------------------------------------------------------------------------------------------------------------------------------------------------------------------------------------------------------------------------------------------------------------------------------------------------------------------------------------------------------------------------------------------------------------------------------------------------------------------------------------------------------------------------------------|-------------------------------------------------------------------------------------------------------|
|           | TMEM243, HOPX, PARD6B,                                                                                                                                                                                                                                                                                                                                                                                                                                                                                                                                                                                                                                                                                                                                                                                                                                                      |                                                                                                       |
| <b>84</b> | HLA-DRB1, MDK, PASK, CDKN2C, E2F7, TNFSF10, AURKA, ADAM19, CKAP4, SPDL1, CDK1, VCAN, DBN1, IGFBP4, KIF20B, DEPDC1, CENPK, BORA, HLA-DMA, ST8SIA4, C12orf75, CAMK4, CYP1A1, DDIT3, DNMT3A, GEM, GUCY1A3, ITGA1, LCK, PDE4B, PDGFRB, PLK1, SOX4, SPIB, ZEB1, ZNF207, FZD3, ENC1, BHLHE40, IER3, NREP, GDF15, IER2, ZEB2, PLK2, FNBP4, ANGPTL2, SLC39A6, PARM1, RND1, UBE2T, DACT1, ARRDC3, MARCKSL1, C1orf54, VASH2, NETO2, CDCA3, AFAP1L2, SGOL1, TUBB2B                                                                                                                                                                                                                                                                                                                                                                                                                     | <a href="http://www.ncbi.nlm.nih.gov/pubmed/25192440">http://www.ncbi.nlm.nih.gov/pubmed/25192440</a> |
| <b>85</b> | MLLT4, ELL2, NMT2, SLC43A3, IL4I1, MCOLN2, MAOA, ZFP36L1, APOBEC3A, TXN, FTH1, CCL7, ACSL1, CCL23, VWA8, RBM47, RPLP1, HSP90B3P, RHBDF2, RPN2, HNRNPC, HMGN2P46, SDF4, FABP5, ANXA2P1, TNIP1, TNIP3, LILRB1, TIMP1, PSTPIP2, MARCKSL1, ADAMDEC1, SLC3A2, SRC, NMI, CYP27B1, KYNU, WSB2, SLC41A2, IL3RA, S100A12, VRK2, YWHAG, CXCL5, ATP2C1, NFS1, BID, MTF1, PPBP, PPP2CB, PDE4DIP, CCL5, SLC2A6, CXCL6, CD40, FABP5P3, IFIH1, LAD1, SDC2, GPR84, C1orf122, LILRA3, CFLAR, CAPZA1, LGALS3, GCH1, EIF1AX, P2RX4, NFE2L3, SLBP, CLIC4, MMP12, ACP2, MYC, ARL6IP1, ATP11B, ZSWIM4, VPS37A, SRGN, FTH1P3, TDP2, OAS3, C6orf211, SMAD7, SMARCA5, HSPA13, GPBP1, PARP10, BOLA2, NUP62, IL7R, G3BP1, LARP4, LILRB4, ILK, SLC16A3, GRINA, C1QTNF1, SOD2, FAM129B, RPS29, TPI1, LOC440704, HSPB1, MT1H, EXOG, CD68, PTMA, MT1X, KIAA1147, PDIA3P1, MT1IP, MT1E, GYPC, TPT1, SLC29A1 | <a href="http://www.ncbi.nlm.nih.gov/pubmed/24530056">http://www.ncbi.nlm.nih.gov/pubmed/24530056</a> |
| <b>86</b> | DCK, CAT, EIF4B, P2RY13, SLC2A9, CPED1, ATP2B4, HENMT1, FGL2, EEF1B2, SRSF6, QPRT, PTEN, ACAT2, RNF7, RAB11A, CUTA, RAB7A, AGTPBP1, TSPAN32, ETFA, HADH, C14orf159, GSTK1, FLOT2, PRKAR1A, GNS, C5, ALAD, TMEM131, AP1S2, BHLHE40, GPN1, CPNE3, MPPE1, NDUFA1, ATP6V0E2, DOCK2, MGST2, ARHGEF6, HCP5, LRMP, HEXB, NDUFB5, LY86, PBX3, PQLC3, RNF125, ESYT2, RGS18, RPS4X, VAMP8, TMEM256, ARHGAP15, ERP29, NUDT1, ACACA, ATP5A1, NAA20, ACTR2, CHN2, FBXO33, SLC25A3, PLEK, ALG13, SNCA                                                                                                                                                                                                                                                                                                                                                                                     | <a href="http://www.ncbi.nlm.nih.gov/pubmed/24530056">http://www.ncbi.nlm.nih.gov/pubmed/24530056</a> |

|    |                                                                                                                                                                                                                                                                                                                                                                                                                                                                                                                                                                                                                                                                                                                                                                                                                                                                                                                                                                                                                                                                        |                                                                                                       |
|----|------------------------------------------------------------------------------------------------------------------------------------------------------------------------------------------------------------------------------------------------------------------------------------------------------------------------------------------------------------------------------------------------------------------------------------------------------------------------------------------------------------------------------------------------------------------------------------------------------------------------------------------------------------------------------------------------------------------------------------------------------------------------------------------------------------------------------------------------------------------------------------------------------------------------------------------------------------------------------------------------------------------------------------------------------------------------|-------------------------------------------------------------------------------------------------------|
| 87 | <p>CD69, HAPLN3, C15orf48, DUSP5, LGALS3BP, ISG20, LILRA3, AARS, C1orf228, IRF8, TMEM38B, SERPING1, MTHFD2, HCAR3, APOBEC3A, AIM2, PTPN1, JAK2, LAP3, B4GALT5, MT2A, NCOA7, CCND1, STAT1, BATF2, STAT2, MT1A, RHBDF2, PARP14, PSAT1, NCF1, MAP3K7CL, GBP1, RARRES3, SCO2, IFIT3, CD274, CPD, FEM1C, TGM2, LONRF1, BTG3, SLC1A5, IRF1, EXOG, C2, SLAMF7, CD86, ADAMDEC1, SIK1, C18orf8, SLC7A5, STX11, ARID5B, ASCL2, IL15, LYSMD2, GK, BHLHE41, SLCO4A1, WARS, PARP9, HIST2H2BE, TMEM140, KYNU, IFIT2, TAGAP, CXCL9, TSC22D3, TAP1, GREM1, APOL3, PTRF, RIPK2, P2RX7, HPS3, HLA-F, BPI, HIST2H2AC, UBE2L6, SLAMF1, GBP4, CCL8, GBP2, CFB, SSPN, IL1B, LRRK2, SCML1, ITGB7, TAP2, KLF9, FAM126B, SLC6A12, IFIH1, PDE4B, LILRB3, GPR84, TNFAIP6, PSME2, HELZ2, TSC22D1, GPC4, CRISPLD2, CXCL10, DDX60, PLEK, ASNS, IRF7, SAMD9L, ANKRD22, TNFSF10, BTN3A1, RHBDF1, XRN1, VAMP5, MYOF, FAM129A, C12orf57, GCH1, NINJ1, SCG5, FAM26F, CCL5, NCF1C, GBP5, HLA-H, MT1IP, AKIRIN2, SNX10, MT1E, HLA-A, PPARGC1B, CD38, AK4, LILRB4, ATF3, PSMB9, PSMB8, DUSP10, LAT, SOD2</p> | <a href="http://www.ncbi.nlm.nih.gov/pubmed/24530056">http://www.ncbi.nlm.nih.gov/pubmed/24530056</a> |
| 88 | <p>CAT, FHOD1, ZNF428, STAB1, PLAUI, RBP1, STMN1, TGFBI, ITGB5, NUDT14, SLC18B1, DCAF6, SVIL, FAM198B, CTSD, APMAP, LINC00857, EPDR1, RGS19, GSTP1, NREP, CPVL, PDGFC, TNFSF12, TOP2A, CCL23, S100A4, COLEC12, SNX2, GPR34, EPAS1, FCGRT, NRG1, CLEC4A, SUSL1, CYBRD1, PCED1B, PFN1, CORO1A, PON2, AGRP, F13A1, PEPD, TSPAN4, HADH, MS4A6A, CD163, TLR5, NUSAP1, LDHB, YWHAH, ID3, MMD, CHST13, APOE, RAB3IL1, FOLR2, PCOLCE2, TCEAL4, FUCA1, PLA2G15, SORL1, SLCO2B1, ADAMTSL4, MFNG, PPBP, RAB7B, PLTP, TMEM236, CFD, ATP8B4, CD36, SEPP1, APOC1, MFSD1, DDIAS, RNASE1, ALOX5AP, PNPLA6, NME4, NAIP, MGST2, MYL6, POTEKP, ACTG1, RGS18, TMEM173, ACTB, CXCL5, CYTL1, PPIA, HNMT, DBI, TSPO, NGFRAP1, MS4A4A, AKR1A1, CTSH, CTDSPL</p>                                                                                                                                                                                                                                                                                                                                | <a href="http://www.ncbi.nlm.nih.gov/pubmed/24530056">http://www.ncbi.nlm.nih.gov/pubmed/24530056</a> |

|    |                                                                                                                                                                                                                                                                                                                                                                                                                                                                                                                                                                                                                                                                                                                           |                                                                                                       |
|----|---------------------------------------------------------------------------------------------------------------------------------------------------------------------------------------------------------------------------------------------------------------------------------------------------------------------------------------------------------------------------------------------------------------------------------------------------------------------------------------------------------------------------------------------------------------------------------------------------------------------------------------------------------------------------------------------------------------------------|-------------------------------------------------------------------------------------------------------|
| 89 | <p>CBR3, CLEC10A, FZD2, CD1C, SIGLEC10, PARM1, CCL26, FCER2, MAOA, MAP4K1, FOXQ1, HOMER2, PDXK, GALNT18, NAGPA, CD209, INSIG2, RTKN, SUCNR1, NFXL1, FAM60A, FCER1A, DUOX1, ASAP1, CXCR2P1, FGL2, GPD1L, PALLD, QPRT, C17orf58, C1orf54, CMTM8, CARD9, ADAM19, LIPA, SLC27A3, CTNNAL1, ASCL2, CD1A, RAB33A, DHRS2, RASGRP3, GATM, DTNA, RASSF7, ZNF366, BLOC1S6, PTPRE, ACOT7, STARD7, CCDC6, RASL10A, INTS3, ST6GAL1, DHRS11, ADAM15, PTRF, SGK223, PPP1R14A, BATF3, RAMP1, CERK, MMP12, SLAMF1, IL1R2, KIAA1671, SOCS1, RAP1GAP, ALOX15, CD1E, CDKN1A, SOX8, DENND1B, VCL, SPINT2, PFKP, RHBDF1, FSCN1, RRP1B, SNX8, LOC283070, PPM1F, GOLGA8B, ESPNL, CDR2L, NMNAT3, CCL22, TTC9C, CLEC4G, AUH, PTPRO, CLEC4A, CHN2</p> | <a href="http://www.ncbi.nlm.nih.gov/pubmed/24530056">http://www.ncbi.nlm.nih.gov/pubmed/24530056</a> |
| 90 | <p>RBP1, LRPAP1, NUP214, CXCL8, ANKRD33, MLKL, FCN1, DRAM1, VSIG4, DFNA5, TCF7L2, CTSD, GAPT, NCEH1, CPED1, DUSP6, CTSG, CYBB, CXCL2, PGAM4, TOP2A, C5AR1, LTA4H, RHBDF2, CEBPB, GCHFR, JAKMIP2, CYP27A1, AKR1C3, AGRP, AQP9, ADAMDEC1, NFKBIZ, CCL2, STX11, CD163, OLR1, NUSAP1, S100A8, BOK, FOLR3, GLRX, CD14, APOE, SLC11A1, PLSCR1, ITGAL, S100A9, CXCL5, HDDC2, FAM213A, ENG, MCEMP1, PPBP, SCPEP1, TBC1D2, LAPTM5, PLTP, PNKD, IL1B, CLEC5A, ENPP4, CEBPD, CD37, APOC1, SNTB1, PGD, DNASE2, SPARC, ALOX5AP, PLIN2, GPNMB, S100P, FKBP15, IFI30, SLC7A7, NUPR1, SCARB2, PIM1, LYZ, ALDH1A1, CD300LF, HBEGF, FCER1G, DAB2, TMEM173, CYTL1, CD68, WLS, FAM89A, NCF4, SERPINA1, IL7R, NGFRAP1, CTSL, PLAUR, FCGR1B</p> | <a href="http://www.ncbi.nlm.nih.gov/pubmed/24530056">http://www.ncbi.nlm.nih.gov/pubmed/24530056</a> |

|    |                                                                                                                                                                                                                                                                                                                                                                                                                                                                                                                                                                                                                                                                                                                                                                                                                                                                                                                                                                                                                                                                                                                                                                                                                                                                                                                                                                                                                                                                                                                                                                                                                                                                                                                                                                                                                                      |                                                                                                              |
|----|--------------------------------------------------------------------------------------------------------------------------------------------------------------------------------------------------------------------------------------------------------------------------------------------------------------------------------------------------------------------------------------------------------------------------------------------------------------------------------------------------------------------------------------------------------------------------------------------------------------------------------------------------------------------------------------------------------------------------------------------------------------------------------------------------------------------------------------------------------------------------------------------------------------------------------------------------------------------------------------------------------------------------------------------------------------------------------------------------------------------------------------------------------------------------------------------------------------------------------------------------------------------------------------------------------------------------------------------------------------------------------------------------------------------------------------------------------------------------------------------------------------------------------------------------------------------------------------------------------------------------------------------------------------------------------------------------------------------------------------------------------------------------------------------------------------------------------------|--------------------------------------------------------------------------------------------------------------|
| 91 | <p>SELM, EHD1, IL10RA, NAMPT, MCTP1, C15orf48, SLC7A11, SIGLEC10, CDK5RAP2, EREG, TERF2IP, IL1A, ISG20, MYH11, MCOLN2, CLCF1, DDIT4, ANKRD12, AARS, SQSTM1, FLNB, NUB1, DCUN1D3, CXCL8, RILPL2, DRAM1, ATOX1, PTGS2, MAP3K4, UPB1, ADARB1, CREG1, PTPN1, RNF19B, IER3, NKG7, FAM60A, IL2RA, SLC7A1, MT1H, SAMSN1, ASCC1, FYN, MT2A, ETS1, PPP3CC, MT1A, LAT, RHBD2, G0S2, CEP135, PANX2, C5orf15, HMGN2P46, ORM1, TRAF1, C17orf58, MB21D2, LPAR1, TRAF3IP2, TNFAIP3, SEMA4A, ARHGEF2, LMO4, TNIP1, TBC1D9, ACSL5, CYP2S1, BTG3, TNIP3, EXOG, NLRP3, SEMA6B, PSTPIP2, PTGES, MARCKSL1, CD86, NFKB1, LSS, AQP9, TANK, CCR7, MT1G, LAMB3, SLC25A37, RUNX2, ADAMDEC1, NFKBIE, SYT11, PVRL2, MLLT6, MT1F, ETS2, SLC7A5, CA12, MRPS6, GK, SLC3A2, BHLHE41, WARS, TNFAIP2, CXCL16, PILRA, CCDC115, TMEM205, HIST2H2BE, SIK3, ITGB8, PPP1R18, PTPRE, NBN, HIVEP1, GRAMD1A, KYNU, SLC1A3, NFE2L1, PCNX, CD14, CYP27B1, APBB3, FPR2, CEP350, CTTN, IRAK2, DDX59, CCM2L, PIM2, TSPAN33, ACO1, TAP1, RNF144B, CXCL5, IKBKE, EMR3, APOL3, H1FO, NADK, ZMIZ2, NFS1, HLA-F, BATF3, HIF1A, MTF1, YARS, STOM, RASGRP1, HIST2H2AC, GJB2, SLAMF1, CLEC4E, CCL5, KIAA0226L, GNA15, CFB, AMPD3, PNKD, MT1X, SMOX, IL1B, BIRC3, MAP1LC3A, ZMYND15, SLC2A6, SPECC1L, OSM, PRKCH, C1S, LAD1, PDE4B, STAT4, GPR84, TNFAIP6, C1orf122, PLAGL2, SLC43A2, HELZ2, TSC22D1, SLC5A3, CXCL1, HEY1, ABHD17C, CRISPLD2, DNAJB6, PGD, NDP, MMP9, ASNS, IRF7, ACKR3, RCN1, SLC9A1, RFTN1, EBI3, TGFA, PPA1, ADORA2A, CLEC4D, MUCL1, GPR132, RELB, FAM20A, GCH1, CTSL, NINJ1, ST3GAL1, SMAP2, MYO1B, TYMP, TNFRSF4, NCF1C, GBP5, HBEGF, CYB561A3, MT1IP, ZSWIM4, IL36G, LAMP3, MT1E, ZHX2, PFKFB3, N4BP1, MXD1, GNA12, CD38, PARP10, DTX2, LILRB2, TMEM132A, EMR2, SPHK1, SIRPA, PLAUR, VEGFA, PTPRF, C1QTNF1, STEAP3, MPZL1, CD82, CLEC4A, DUSP10, GLIS3, SOD2, ISCU</p> | <p><a href="http://www.ncbi.nlm.nih.gov/pubmed/24530056">http://www.ncbi.nlm.nih.gov/pubmed/24530056</a></p> |
|----|--------------------------------------------------------------------------------------------------------------------------------------------------------------------------------------------------------------------------------------------------------------------------------------------------------------------------------------------------------------------------------------------------------------------------------------------------------------------------------------------------------------------------------------------------------------------------------------------------------------------------------------------------------------------------------------------------------------------------------------------------------------------------------------------------------------------------------------------------------------------------------------------------------------------------------------------------------------------------------------------------------------------------------------------------------------------------------------------------------------------------------------------------------------------------------------------------------------------------------------------------------------------------------------------------------------------------------------------------------------------------------------------------------------------------------------------------------------------------------------------------------------------------------------------------------------------------------------------------------------------------------------------------------------------------------------------------------------------------------------------------------------------------------------------------------------------------------------|--------------------------------------------------------------------------------------------------------------|

|    |                                                                                                                                                                                                                                                                                                                                                                                                                                                                                                                                                                                                                                                                                                                                                                                                                                                                                                                                                                                                                                                                                                                                                                                                            |                                                                                                       |
|----|------------------------------------------------------------------------------------------------------------------------------------------------------------------------------------------------------------------------------------------------------------------------------------------------------------------------------------------------------------------------------------------------------------------------------------------------------------------------------------------------------------------------------------------------------------------------------------------------------------------------------------------------------------------------------------------------------------------------------------------------------------------------------------------------------------------------------------------------------------------------------------------------------------------------------------------------------------------------------------------------------------------------------------------------------------------------------------------------------------------------------------------------------------------------------------------------------------|-------------------------------------------------------------------------------------------------------|
| 92 | <p>CD69, SPP1, CAT, LSP1, NUCB2, CRIP1, ATP1B1, DUSP23, RPSAP52, LAMP2, PAQR4, BTK, GCNT1, SULF2, ANKRD33, FCN1, H2AFY, CTSD, COL8A2, LINC00857, ADCY3, CTSG, NREP, PGAM4, PDGFC, S100A4, ITGAM, TOP2A, COLEC12, DPEP2, SCD, FGL2, CD300A, GCHFR, CD9, PYGL, FABP5, VAT1, SAP30, TREM2, ATP5C1, GPR34, JAKMIP2, ADORA2B, NRGN, PLBD1, RBPJ, NFE2, CYBRD1, PCED1B, PON2, AGRP, CEBPA, F13A1, LIPA, TSPAN32, HADH, PTPRO, MS4A6A, TLR5, GRAMD4, CD1B, NUSAP1, VEGFB, MPC2, EVL, DHRS9, CHST13, ME1, MNDA, CHCHD10, APOE, SLFN11, FUCA1, PLXDC2, MGAT4A, PLA2G15, CSTB, HHEX, MFNG, HSPD1, SCPEP1, IQGAP2, RAB7B, HLA-DPA1, PHYH, PLTP, NDUFS5, TMEM236, CFD, FABP5P3, CD36, SEPP1, CD37, LPL, APOC1, DDIAS, SIDT2, RNASE1, MGMT, C1QB, S100A10, TUBA1B, CST3, PLIN2, GPNMB, S100P, APBB1IP, CCDC109B, NTAN1, MGST2, NNT, RPL7A, NUPR1, CORO2A, CKS2, ACP5, SERINC2, AP1S2, KLF4, CAMK1, RCBTB2, CHPT1, CD52, CD68, UBE2C, GPBAR1, SLC29A1, NGFRAP1, MS4A4A, FCGR2B,</p>                                                                                                                                                                                                                                      | <a href="http://www.ncbi.nlm.nih.gov/pubmed/24530056">http://www.ncbi.nlm.nih.gov/pubmed/24530056</a> |
| 93 | <p>ZFYVE16, HNRNPDL, MCTP1, SLC7A11, Mar-03, IL1A, MCOLN2, NEK6, DDIT4, MAOA, NUB1, PHLDB1, TNS3, DRAM1, COX10, SLC20A1, VNN1, INSIG2, OCSTAMP, PTPN1, FAM60A, IL2RA, SLC7A1, ETS1, RHBDF2, G0S2, TSC22D1, EEF1B2, IDH3A, C17orf58, TRAF3IP2, PACSIN2, LMO4, TNIP1, MPO, ACSL5, CS, KLHL5, BTG3, OTUD4, PLGRKT, F5, SIAH1, NFKB1, AQP9, LAMB3, RPL32, ADAMDEC1, PFDN1, SYT11, MT1F, TNC, SLC7A5, CA12, METTL21B, MRPS6, GK, BHLHE41, WARS, EFTUD1, SRC, CCDC115, FILIP1L, ARFGAP3, ATP1A1, PTPRE, NBN, HIVEP1, GRAMD1A, KYNU, SLC1A3, NFE2L1, PCNX, CYP27B1, ANXA5, QPCT, SH3PXD2A, SERPINE1, CTTN, CLINT1, TTC13, IRAK2, SLC41A2, TSPAN33, ACO1, RNF144B, HNRNPA0, FAM213A, NFS1, MTF1, BCAT1, UCK2, SLAMF1, STRN3, GPR124, CCL5, IL1B, BIRC3, SLC50A1, SLC2A6, CLEC5A, LINC00938, PRKCH, LAD1, SLC25A3, GPR84, DENND5A, TNFAIP6, SLC35F2, CRISPLD2, PRKCDBP, DNAJB6, NDP, PLEK, MMP9, SPARC, F3, ANKRD22, SLC9A1, RFTN1, TSKU, EBI3, PPA1, ADORA2A, RGS16, MYOF, ATP5L, METTL1, TNPO1, AK4, ESYT2, SCG5, COA1, FNBP4, TNFRSF4, HBEGF, MT1H, TMEM194A, ZSWIM4, IL36G, RPS4X, ACVR1B, BCL2, FYN, DTX2, HOPX, TMEM132A, PTGES2, EMR2, SPHK1, SFXN4, BID, VEGFA, PTPRF, C1QTNF1, HSD11B1, C6orf48, CD82,</p> | <a href="http://www.ncbi.nlm.nih.gov/pubmed/24530056">http://www.ncbi.nlm.nih.gov/pubmed/24530056</a> |



|    |                                                                                                                                                                                                                                                                                                                                                                                                                                                                                                                                                                                                                                                                                                                                                                                                                                                                                                                                                                                                                                                                                                                                                                          |                                                                                                       |
|----|--------------------------------------------------------------------------------------------------------------------------------------------------------------------------------------------------------------------------------------------------------------------------------------------------------------------------------------------------------------------------------------------------------------------------------------------------------------------------------------------------------------------------------------------------------------------------------------------------------------------------------------------------------------------------------------------------------------------------------------------------------------------------------------------------------------------------------------------------------------------------------------------------------------------------------------------------------------------------------------------------------------------------------------------------------------------------------------------------------------------------------------------------------------------------|-------------------------------------------------------------------------------------------------------|
|    | FMNL3, MTHFD2, SOD2                                                                                                                                                                                                                                                                                                                                                                                                                                                                                                                                                                                                                                                                                                                                                                                                                                                                                                                                                                                                                                                                                                                                                      |                                                                                                       |
| 94 | <p>LSP1, NUCB2, STAB1, METTL7A, GFRA2, RBP1, LAMP2, BTK, SOD1, TGFBI, ANKRD33, FCN1, FOS, LOC440704, CTSD, LINC00857, GAPT, RGS19, TLR7, NREP, CXCL2, CPVL, PDGFC, CCNL1, TNFSF12, S100A4, COLEC12, DPEP2, HSP90B3P, CD300A, FES, GCHFR, KLHDC8B, PYGL, FABP5, ANKRD36B, LGMN, ANXA2P1, C1orf85, TREM2, GPR34, JAKMIP2, B3GNT5, CYP27A1, NRG1, TLR4, EIF2AK2, GMFG, NFE2, PCED1B, AGRP, CD68, F13A1, HLA-DRB3, LIPA, GADD45B, MAF, ZFP36, MS4A6A, TLR5, MAP3K1, NUSAP1, RNF130, S100A8, BOK, ARHGDIA, KLF6, KLF2, IFI27L2, RAB31L1, FOLR2, PCOLCE2, ITPRIPL2, OTUD1, FUCA1, MPZL2, C1orf162, HEBP2, CLTC, PLA2G15, SLCO2B1, MAFB, SCPEP1, RAB7B, PHYH, TMEM236, CFD, FABP5P3, CEBPD, NPL, CCL13, CD36, SEPP1, CD37, FAM102B, AIF1, RNASE1, PTGER4, C1QB, BLVRB, STK17B, CST3, HMOX1, GPNMB, S100P, NAIP, CCDC109B, NTAN1, CAPZA1, LGALS3, IFI30, HMGB1, NUPR1, GRN, CORO2A, ADD3, POTEKP, HLA-DRB6, HIST1H4C, ACP5, ALDH1A1, SERINC2, KLF4, SHISA5, MAN2A1, RCBTB2, CAT, NBP10, SLFN11, ECHDC1, HLA-A, CHPT1, CD52, SRP14, TUBA3D, LYL1, HMGB2, PRMT2, FAM89A, ITGB5, GPBAR1, RTN3, LILRB5, PON2, ILK, NGFRAP1, MS4A4A, LTB, DHRS9, TGFBR2, ARRB2, HNRNPUL1, OSBPL1A</p> | <a href="http://www.ncbi.nlm.nih.gov/pubmed/24530056">http://www.ncbi.nlm.nih.gov/pubmed/24530056</a> |

|    |                                                                                                                                                                                                                                                                                                                                                                                                                                                                                                                                                                                                                                                                                                                                                                                                                                                                                                                                                                                                                                                                                                                                                                                                                                                                                                                                                                                                                                                                                                                                                                                                                                                                                                                                                                                                                                                                                                                       |                                                                                                              |
|----|-----------------------------------------------------------------------------------------------------------------------------------------------------------------------------------------------------------------------------------------------------------------------------------------------------------------------------------------------------------------------------------------------------------------------------------------------------------------------------------------------------------------------------------------------------------------------------------------------------------------------------------------------------------------------------------------------------------------------------------------------------------------------------------------------------------------------------------------------------------------------------------------------------------------------------------------------------------------------------------------------------------------------------------------------------------------------------------------------------------------------------------------------------------------------------------------------------------------------------------------------------------------------------------------------------------------------------------------------------------------------------------------------------------------------------------------------------------------------------------------------------------------------------------------------------------------------------------------------------------------------------------------------------------------------------------------------------------------------------------------------------------------------------------------------------------------------------------------------------------------------------------------------------------------------|--------------------------------------------------------------------------------------------------------------|
| 95 | <p>SELM, CYP26A1, EHD1, IL10RA, HNRNPDL, NAMPT, SAP25, MCTP1, C15orf48, PRDM1, SLC7A11, SIGLEC10, ELL2, DUSP5, EREG, IL1A, ISG20, MCOLN2, PFKFB3, CSF2RA, DDIT4, LILRA3, IRAK3, TFDP1, SQSTM1, TFPI, BANP, VAMP4, NUB1, RAB27A, CXCL8, FCGR2A, PID1, ZC3H12A, TMEM71, VNN1, YPEL2, PTGS2, MAP3K4, RILPL2, UPB1, VNN2, ADARB1, MAMLD1, HIF1A, PTPN1, FOXO3, IER3, NKG7, ZNF281, ST3GAL1, FAM60A, IL2RA, SAMSN1, THBS1, FYN, ETS1, UIMC1, LAT, RHBDF2, G0S2, SPRY1, CEP135, GADD45A, CYTH1, PANX2, TNFRSF10B, TNFRSF21, C17orf58, SLC44A1, MB21D2, TRAF3IP2, AKR1B1, TNFAIP3, SEMA4A, CPD, ETV3, TNIP1, PTGER2, CD93, ULK1, ACSL5, CYP2S1, DMXL2, BTG3, TNIP3, LILRB1, ADAM8, IRF1, RNF145, NLRP3, SEMA6B, PTGES, MARCKSL1, CD86, NFKB1, AQP9, TANK, CCR7, MET, LAMB3, SLC25A37, ADAMDEC1, SYT11, LOR, MLLT6, MT1F, ETS2, SLC7A5, CA12, ARID5B, RYBP, MRPS6, SESTD1, GK, MS4A14, BHLHE41, CXCL16, SLC16A6, TMEM205, GPR162, CHST7, PTPRE, NBN, A4GALT, TBC1D8, HIVEP1, VMO1, GRAMD1A, KYNU, SLC1A3, TBK1, PCNX, CD14, APBB3, FPR2, CEP350, DLL1, PLSCR1, IRAK2, FJX1, BMP6, PIM2, S100A12, TSPAN33, RNF144B, CXCL5, EMR3, APOL3, ST8SIA4, RIPK2, THBD, STX1A, SRGN, ZMIZ2, MEF2D, MTF1, BCAT1, IL13RA1, HIST2H2AC, GJB2, RAPGEF1, TM4SF1, SLAMF1, CLEC4E, NFKBIA, CCL5, DNAJB9, GNA15, IL24, SMOX, IL1B, BTG1, BIRC3, MAP1LC3A, CREBRF, ZMYND15, SLC2A6, CXCL6, PELI2, OSM, PRKCH, LAD1, PDE4B, SLC16A10, RFX8, STAT4, GPR84, DENND5A, TNFAIP6, SLC43A2, RUNX3, SLC5A3, CXCL1, HEY1, ABHD17C, CRISPLD2, PDE4D, SOD2, DNAJB6, CRLF2, HIST1H2BK, SMPDL3A, PTPRF, ACKR3, RFTN1, CXCR4, PRDM8, EBI3, VEGFA, VNN3, TGFA, ADORA2A, XBP1, LAMC1, CYP3A5, GCH1, ANKDD1A, CEMIP, NINJ1, AK4, TXN, PGS1, SMAP2, IRS2, MYO1B, NUA2, FNBP4, EPB41L3, TNFRSF4, GBP5, HBEGF, ZSWIM4, IL36G, ITGAV, LAMP3, ZHX2, ARRDC3, NSUN7, MXD1, TMCO3, PILRA, DTX2, WTAP, C9orf72, LILRB2, HOPX, TGIF1, IL7R, GPR64, KL, BTN2A1, FCAR, PLAUR</p> | <p><a href="http://www.ncbi.nlm.nih.gov/pubmed/24530056">http://www.ncbi.nlm.nih.gov/pubmed/24530056</a></p> |
|----|-----------------------------------------------------------------------------------------------------------------------------------------------------------------------------------------------------------------------------------------------------------------------------------------------------------------------------------------------------------------------------------------------------------------------------------------------------------------------------------------------------------------------------------------------------------------------------------------------------------------------------------------------------------------------------------------------------------------------------------------------------------------------------------------------------------------------------------------------------------------------------------------------------------------------------------------------------------------------------------------------------------------------------------------------------------------------------------------------------------------------------------------------------------------------------------------------------------------------------------------------------------------------------------------------------------------------------------------------------------------------------------------------------------------------------------------------------------------------------------------------------------------------------------------------------------------------------------------------------------------------------------------------------------------------------------------------------------------------------------------------------------------------------------------------------------------------------------------------------------------------------------------------------------------------|--------------------------------------------------------------------------------------------------------------|

|    |                                                                                                                                                                                                                                                                                                                                                                                                                                                                                                                                                                                                                                                                                                                                                                                                                                                                                                                                                                                                                                                                                                                                                                                                                                                                                                                                                                                                                                                                                                                                                                                                                                                                                                                                   |                                                                                                       |
|----|-----------------------------------------------------------------------------------------------------------------------------------------------------------------------------------------------------------------------------------------------------------------------------------------------------------------------------------------------------------------------------------------------------------------------------------------------------------------------------------------------------------------------------------------------------------------------------------------------------------------------------------------------------------------------------------------------------------------------------------------------------------------------------------------------------------------------------------------------------------------------------------------------------------------------------------------------------------------------------------------------------------------------------------------------------------------------------------------------------------------------------------------------------------------------------------------------------------------------------------------------------------------------------------------------------------------------------------------------------------------------------------------------------------------------------------------------------------------------------------------------------------------------------------------------------------------------------------------------------------------------------------------------------------------------------------------------------------------------------------|-------------------------------------------------------------------------------------------------------|
| 96 | <p>CD69, SPP1, ATP5D, BCL2L1, CD1C, LSP1, STAB1, METTL7A, GFRA2, MDH1, CRIP1, STMN1, DUSP23, RPSAP52, RNH1, APEX1, AP2S1, CLEC12A, UQCRCQ, GCNT1, RBX1, PLD3, ANKRD33, PPT1, VSIG4, NUDT14, HK3, ALCAM, GALM, ATP5F1, QDPR, ATIC, H2AFY, CTSD, COL8A2, HSPB1, ADCY3, CTSG, NREP, PGAM4, FKBP1A, LAP3, S100A4, ITGAM, TOP2A, IFI6, LST1, CDK4, DPEP2, SCD, ITGB1BP1, HSP90AA1, SNX2, FGL2, EIF3K, PCNA, GCHFR, LY6E, CD9, PYGL, FABP5, IDH1, SLC38A6, ANXA2P1, C1orf85, PYCARD, HCST, VAT1, TREM2, ATP5C1, GPR34, JAKMIP2, AIF1, TUBB, NRG1, PLBD1, RBPJ, IFI16, GMFG, NFE2, ANXA2, PCED1B, CARD9, HSPH1, PFN1, CORO1A, PON2, AGRP, AHNK, CEBPA, F13A1, LIPA, TSPAN32, HADH, CCL2, PTPRO, TECR, MSMD1, MS4A6A, C14orf159, CD163, SLC29A1, LGALS1, GRN, CD1B, NUSAP1, LDHB, FBP1, BOK, ATP1B1, EVL, MARCO, ID3, RGS10, DHRS9, CHST13, ARHGAP1, ME1, CALR, SH3BP1, PSMD14, C1QA, MNDA, CHCHD10, ACOT7, IFI27L2, APOE, NME1, RAB31, TUBA1A, EGR2, A2M, CORO1C, FOLR2, S100A11, IDH2, CECR1, DHRS3, FUCA1, PLXDC2, NDUFS3, PLA2G15, ADAM15, HCFC1R1, IFI44, SEPN1, ESYT1, CSTB, HHEX, HSPD1, SCPEP1, IQGAP2, RAB7B, HLA-DPA1, PHYH, PLTP, TMEM236, CFD, ITGB7, BSG, FABP5P3, IMMT, CCL13, CD36, SEPP1, C1QC, CD37, LPL, 40787, APOC1, MFSD1, DDIAS, UQCC2, SIDT2, DCSTAMP, RNASE1, PTGER4, DNASE2, C1QB, S100A10, MCM6, ACAT1, TUBA1B, CST3, NME4, GPNMB, S100P, EMP1, APBB1IP, CCDC109B, NTAN1, MGST2, HIBADH, IFI30, SLC7A8, NUPR1, POTEK, ACTB, ACTG1, CKS2, ACP5, GGCT, MRPL15, PGAM1, CISD1, YBX1, LRP3, CTNNA1, KLF4, CAMK1, TMEM173, SLFN11, NDUFB1, BANF1, COX7B, CYTL1, PPIA, CD52, LYL1, MRPL18, TSPO, KCNA1, ITGB5, HMG1, GPBAR1, CD1E, YIF1B, CD276, ALG8, NGFRAP1, MS4A4A, ZYX, CD74, FCGR1B, CTDSPL, OSBP1A, LGALS9,</p> | <a href="http://www.ncbi.nlm.nih.gov/pubmed/24530056">http://www.ncbi.nlm.nih.gov/pubmed/24530056</a> |
| 97 | <p>ZBTB34, SLC7A11, OAS2, IFNGR1, FAM60A, STAT2, CENPD1, VMP1, LPAR1, TLR8, CD86, ADAMDEC1, CXCL16, PARP9, VMO1, PRKAR1A, PCNX, MKLN1, MAPK13, CFB, TRIM22, HELZ2, BCDIN3D, MOB3C, ZNF22, HCP5, CCDC117, SAMD9, ISG15, SMAP2, FBNP4, BCL2L13, MX2, PTPRE</p>                                                                                                                                                                                                                                                                                                                                                                                                                                                                                                                                                                                                                                                                                                                                                                                                                                                                                                                                                                                                                                                                                                                                                                                                                                                                                                                                                                                                                                                                      | <a href="http://www.ncbi.nlm.nih.gov/pubmed/24530056">http://www.ncbi.nlm.nih.gov/pubmed/24530056</a> |

|            |                                                                                                                                                                                                                                                                                                                                                                                                                                                                                                                                                                                                                                                                                                                                                                                                                                                                                                                                                                                                                                    |                                                                                                       |
|------------|------------------------------------------------------------------------------------------------------------------------------------------------------------------------------------------------------------------------------------------------------------------------------------------------------------------------------------------------------------------------------------------------------------------------------------------------------------------------------------------------------------------------------------------------------------------------------------------------------------------------------------------------------------------------------------------------------------------------------------------------------------------------------------------------------------------------------------------------------------------------------------------------------------------------------------------------------------------------------------------------------------------------------------|-------------------------------------------------------------------------------------------------------|
| <b>98</b>  | ANKRD33, CTSD, CCNL1, PPIA, FABP5, ANXA2P1, SAP30, JAKMIP2, UBE2C, NFKBIZ, NUSAP1, LDHB, BOK, KLF2, DBI, CLTC, PLTP, TMEM236, CFD, FABP5P3, IMMT, 40787, MGMT, PTGER4, STK17B, HMGB1, NUPR1, POTEKP, HLA-DRB6, CKS2, RPL5, YBX1, SKAP2, KLF4, NBPFI10, KANSL1, SRP14, MYADM, ILK, MS4A4A, UGP2                                                                                                                                                                                                                                                                                                                                                                                                                                                                                                                                                                                                                                                                                                                                     | <a href="http://www.ncbi.nlm.nih.gov/pubmed/24530056">http://www.ncbi.nlm.nih.gov/pubmed/24530056</a> |
| <b>99</b>  | KCTD12, SOX4, NOV, LRRC17, TBX18, SCD, BDKRB2, WNT2, SLC7A14, FER1L6, CLDN11, VCAM1, ADAMTS14, CCKAR, CREB5, TNFAIP6, CRABP2, IGDCC4, TMEM35, GDF15, TSLP, ADAM12, AQP3, FST, PER3, PRSS35, PIEZO2, TNFRSF11B, RND2, CDH6, LIF, ITGA11, ADCY1, SIPA1L2, PHGDH, AMOT, HMOX1, PGBD5, CDON, MXRA5, PLA2G4A, FAM171B, CPA4, AIF1L, GPR68, HSD17B6, LHFPL2, SLC6A9, C4orf46, OLFML2A, EPHB2, GXYLT2, SLC14A1, LRRC15, ODZ4, BDKRB1, BMPER, FAM46C, MARCKS, WARS, ARHGAP28, RCAN2, TMEM119, RAP2B, CDKN2B, MEST, IFIT1, SLC39A10, EPHB3, TUBB, RPS6KA5, LDB2, TUBA1A, C14orf132, TMEM200A, NCKAP5, TUBB3, NEK10, PHLDA1, LOC148145, NYNRIN, RN5-8S1, SLC6A6, RHOJ, FLRT3, TRIM45, CIT, PDE5A, RTKN2, ARSI, G0S2, VEGFA, FAM46A, SEMA3A, JUN, SAMD12, CLIC2, SOX9, GRAMD4,                                                                                                                                                                                                                                                                | <a href="http://www.ncbi.nlm.nih.gov/pubmed/24926665">http://www.ncbi.nlm.nih.gov/pubmed/24926665</a> |
| <b>100</b> | C7, CCDC69, DUSP1, FKBP5, GPX3, KLF15, MAOA, SAMHD1, SERPINA3, SPARCL1, RGCC, TSC22D3, CRISPLD2, PER1, ERFFI1, STEAP4, MT2A, METTL7A, IRS2, RASL11A, FGD4, INHBB, NNMT, KCNK6, GLUL, KLF9, NA, ITGA10, CORO6, ADRA1B, IMPA2, ZBTB16, FOXO1, ADAMTS5, PDK4, ENDOD1, SORT1, CACNB2, ADARB1, NEXN, NAV3, DCXR, STC1, TRNP1, IGFBP2, MAMDC2, SUN2, FSTL3, PTX3, GPRC5B, HSPA2, FAM107A, TJP2, PPP1R14A, MTSS1, CYR61, USP53, GPM6B, ADAMTS1, TRPC6, RASL11B, LMCD1, MMD, ACSL1, PKDCC, STEAP1, ACSS1, TIMP4, COL11A1, PLXNA4, MT1X, APCDD1, DNAJB4, ACTG2, GGT5, LEP, CD302, MT1E, AOX1, CEBPD, DAAM2, TEX2, TCEAL4, SAT1, PHC2, SPON1, KLF5, AFAP1L1, NKD1, PIK3R1, CDC42EP3, CTPS1, INPP5A, PRODH, FBN2, PXDC1, NID1, ALPK3, NR4A3, HPS5, PDPN, EPHB6, ATF3, OXTR, RAB11FIP1, CITED2, RAPGEF5, COL4A1, NEGR1, PRKAG2, SLC16A12, SMARCD2, NEDD9, GALNT15, MYADM, FZD8, CILP, GFPT2, AHCTF1, EOGT, SSH2, SMIM3, DLL4, C10orf10, CHST7, GCNT4, SCARA5, STON1, SLC7A6, ABLIM1, NCOA3, TGFB2, MOB3B, COL4A4, RNF144B, FOXO3, GCLM, DAPK2, | <a href="http://www.ncbi.nlm.nih.gov/pubmed/24926665">http://www.ncbi.nlm.nih.gov/pubmed/24926665</a> |

|            |                                                                                                                                                                                                                                                                                                                                                                                                                                                                                                                                                                                                                                                                                                                                       |                                                                                                       |
|------------|---------------------------------------------------------------------------------------------------------------------------------------------------------------------------------------------------------------------------------------------------------------------------------------------------------------------------------------------------------------------------------------------------------------------------------------------------------------------------------------------------------------------------------------------------------------------------------------------------------------------------------------------------------------------------------------------------------------------------------------|-------------------------------------------------------------------------------------------------------|
|            | MAP1LC3C, COL7A1, CYTH3, FIBIN, DIO2, HIGD1A, CPM, NFIL3, RHOB, HSPB3, CD82, STARD7, WFDC1, ZCCHC5, ANXA4, RAI2, KANK1, SCN7A, ABHD5, STOM, SYNPO2, LBH, RASD1, CALCOCO2, POTE, C1QTNF1, CADPS2, LAMA3, ZHX3, LGI3, ZCCHC6, TSPAN8, CORIN, ENPP1, GADD45B, SAMD4A, LRRC16A, DHRS3, PREB, HMGB2, MAFF, NAMPT, JADE1, ARMC8, NUAK1, ARHGAP29, DDAH1, MICAL2, ANPEP, PNPLA2, KLF6, AASS, CBS, WASF3, LMOD1, RSPO1, AP1M1, FAM43A, FAM46B, SQRDL, LINC00312, FZD5, SAP30, VGLL3, ING2, TM4SF1, DUSP5, FADS3, CTGF, RWDD4, KLHL42, STK17B, REV3L, EBF1, APBB2, HSD11B1, AXIN2, TXNRD1, ABCA6                                                                                                                                               |                                                                                                       |
| <b>101</b> | ADAMTS9, ALOX15, BCL2L15, C1QTNF1, CA2, CCBL1, CCL26, CD274, CD44, CDH26, CISH, CST1, CST2, CST4, CTSC, DPP4, FAM26E, FETUB, GGH, HS3ST1, LRRC31, NTRK1, NABP1, PCSK6, POSTN, SERPINB4, SH2D1B, SIDT1, SLC26A4, SLC39A8, SLC5A1, SOCS1, SUSP2, USP54                                                                                                                                                                                                                                                                                                                                                                                                                                                                                  | ADEPT cohort                                                                                          |
| <b>102</b> | KLRC4, CCL3L3, IL12RB2, CCL5, KLRD1, GZMA, KLRC4, GZMB, CCL4, CCR2, PLEK, SULF2, ENTPD1, ITGAX, MS4A4A, GPR55, IL21R, GRAMD3, DENND4A, PRF1, IRG1, TIGIT, CD2, SYTL2, MMP9, UGCG, CST7, CPNE7, CD28, C1orf21, SH2D2A, KLRB1, PMEPA1, CHSY1, SAMD3, SEPN1, GAS7, NCF1, HOPX, CDH1, MCTP2, SULT2B1, BCL2L11, GPR18, TRAT1, GPR174, ICAM1, PIK3R5, ADAMTS14, ZDHHC15, PADI2, GPC1, SEMA6D, SATB1, ITM2A, KDM2B, LYST, GLP1R, LRRC8D, EOMES, SELL, BAIAP3, BAIAP2                                                                                                                                                                                                                                                                         | <a href="http://www.ncbi.nlm.nih.gov/pubmed/25621825">http://www.ncbi.nlm.nih.gov/pubmed/25621825</a> |
| <b>103</b> | CCR8, CCR4, IL5, KLRG1, IL17RB, HS3ST1, IL1RL1, IL13, SLC7A8, CD27, NEB, RXRG, CALCA, IL6, IL4, PTPN13, PDCD1, NPNT, HLA-DOA, HES1, LPCAT2, IL9R, PPARG, TPH1, STXBP6, CYBB, BMP7, INPP4B, CCL1, BMP2, AR, MC5R, ATP8A2, PPP2R3A, KCNN4, DGAT2, NMUR1, KCNQ5, RAB27B, LRRC52, ALOX5, PTGIR, ZC3H12C, TGM2, IL10RA, ACER2, HBA2, GATA3, CHDH, NCK2, BZW2, NAIP, MRAS, C19orf38, HBA2, TSPAN13, AREG, EBI3, KLF5, PLAUR, ADAM19, IRF4, EEPD1, PDLIM1, NCKAP5, TANC2, SERPINE1, FBXL21, UBE2E2, RNF128, IPMK, CA13, MED12L, CXorf57, PARD3, CHD7, PDE7B, PCSK1, MAP4K3, LGMN, TAF1D, RPS19, CACNA1D, SPCS3, ST6GALNAC5, RPLP1, NFKB1, GALNT3, CXCL1, NAIP, SNORA45A, LPHN2, DHX40, STAB2, PLK2, GLB1, PTPN9, RAB4A, NFIX, BAMBI, UBE2L6, | <a href="http://www.ncbi.nlm.nih.gov/pubmed/25621825">http://www.ncbi.nlm.nih.gov/pubmed/25621825</a> |

|            |                                                                                                                                                                                                                                                                                                                                                                                                                                                                                                                                                                                                                                                                                                                              |                                                                                                       |
|------------|------------------------------------------------------------------------------------------------------------------------------------------------------------------------------------------------------------------------------------------------------------------------------------------------------------------------------------------------------------------------------------------------------------------------------------------------------------------------------------------------------------------------------------------------------------------------------------------------------------------------------------------------------------------------------------------------------------------------------|-------------------------------------------------------------------------------------------------------|
|            | NAV2, ACBD7, SNORD8, FAM71F2, APBB2, MBOAT1, C9orf72, ARL5C, RUNX1T1, HLF, CSF2, EMP3, HOMER2, CYP51A1, SPRY1, GRIN2D, CYP2D7, FOXP3, UNC5B, SPECC1, DUSP10, C21orf62, KRT80, KLF4,                                                                                                                                                                                                                                                                                                                                                                                                                                                                                                                                          |                                                                                                       |
| <b>104</b> | GSTM3, UPP1, EPS8L3, IL1R2, CXorf23, F2RL2, CAPG, FAH, DUSP4, GDA, NMBR, CCNE2, GJB2, RYK, TMTC2, DPEP2, B3GALT2                                                                                                                                                                                                                                                                                                                                                                                                                                                                                                                                                                                                             | <a href="http://www.ncbi.nlm.nih.gov/pubmed/25621825">http://www.ncbi.nlm.nih.gov/pubmed/25621825</a> |
| <b>105</b> | CXCR5, IL1R1, STOM, PTGES, CNTN1, NRP1, VIPR2, HMGN3, CTSH, CCR6, APOBEC1, CD2AP, MAPK10, P2RY1, GUCY1A3, IGFBP4, LINGO4, DLL1, TIFA, PTGER2, SDC4, HS6ST2, IGF1R, CX3CL1, IL17RE, GRIA3, GALM, NPL, SDC2, KIAA1598, ATRNL1, PPAP2B, SNORD14C, SLC6A13, CACNA1G, DNAJC6, ERMP1, RNASE6, OR4C12, PDE6D, PDGFRB, DDC, NAPEPLD, EEF2K, TUBA8, ADK, FAM184B, TRAPPC2, TOX2, HELLS, SLC41A3, KHDRBS3, BATF3, ALG14, MSRB3, FLRT2, TTYH2, SDC1, LTB, DSG2, TMEM60, CITED4, LDHB, SLC6A7, ACTR6, ACAT1, HLA-DQA1, ABCA3, SRR, IRGM, HK3, DNAJB1, GOLPH3L, HTRA2, PARVB, TM9SF2, FERMT2, PLB1, CDC14A, ABHD15, DENND3, MED21, TMEM70, RHOB, FANCL, PMPCB, GDPD5, DSCAM, TMEM229B, P2RX1, APOA1, EID1, LSM10, ZNF43, TMEM126B, ABCA1, | <a href="http://www.ncbi.nlm.nih.gov/pubmed/25621825">http://www.ncbi.nlm.nih.gov/pubmed/25621825</a> |
